# Supplementary material for: Iron catalyzed ketoalkylation and ketoalkylation/etherification of styrenes initiated by selective C–C bond cleavage
Source: Royal Society of Chemistry journal article supplement (doi:10.1039/d0qo00671h), 2020-01-01

## Supporting Information

### Iron catalyzed ketoalkylation and ketoalkylation/etherification of styrenes initiated by selective C-C bond cleavage

Meng-Ting Suo, Shuo Yang, Jun-Cheng Yang, Ze-Yu Liu, Jun-Jie Zhang, and Li-Na Guo\*

Department of Chemistry, School of Chemistry, Xi'an Key Laboratory of Sustainable Energy Material

Chemistry, and MOE Key Laboratory for Nonequilibrium Synthesis and Modulation of Condensed

Matter, Xi'an Jiaotong University, Xi'an 710049, China.

Email: guoln81@xjtu.edu.cn

### Table of Contents

|                                                                                                                              |     |
|------------------------------------------------------------------------------------------------------------------------------|-----|
| General Information                                                                                                          | S2  |
| Starting Materials                                                                                                           | S2  |
| Optimization of Reaction Conditions                                                                                          | S3  |
| General Procedure for the Alkyl-Heck-type Coupling of Cyclopentyl Silyl Peroxide <b>1a</b> with Styrene <b>2a</b>            | S3  |
| Table S1. Optimization of the Reaction of Cyclopentyl Silyl Peroxide <b>1a</b> with Styrene <b>2a</b>                        | S4  |
| General Procedure for the Oxyalkylation of 4-Methoxystyrene <b>2b</b> with Cyclopentyl Silyl Peroxide <b>1a</b> and Methanol | S7  |
| Table S2. Optimization of the Reaction of Cyclopentyl Silyl Peroxide <b>1a</b> with 4-Methoxystyrene <b>2b</b> and Methanol  | S8  |
| Representative Procedure for the Alkyl-Heck-type Couplings of Cycloalkyl Silyl Peroxides <b>1</b> with Olefins <b>2</b>      | S9  |
| Representative Procedure for the Oxyalkylation of Olefins <b>2</b> with Cycloalkyl Silyl Peroxides <b>1</b> and Nucleophiles | S10 |
| Larger Scale for the Reaction of Cyclopentyl Silyl Peroxide <b>1a</b> with Styrene <b>2a</b>                                 | S11 |
| Larger Scale for the Reaction of Cyclopentyl Silyl Peroxide <b>1a</b> with 4-Methoxystyrene <b>2b</b> and Methanol           | S12 |
| Investigation of the Reaction Mechanism                                                                                      | S13 |
| Characterization of Products <b>3</b> , <b>4</b> and <b>5</b>                                                                | S14 |
| References                                                                                                                   | S37 |
| <sup>1</sup> H NMR and <sup>13</sup> C NMR Spectra of Products <b>3</b> , <b>4</b> , <b>5</b> and <b>6a</b>                  | S38 |

## General Information

All reactions were conducted in 10mL oven-dried reaction tube under an atmosphere of nitrogen. Reactions were monitored by thin layer chromatography (TLC) and visualized using UV light or a basic DNP solution. Column chromatography was carried out on silica gel.  $^1\text{H}$  NMR and  $^{13}\text{C}$  NMR spectra were recorded on a Bruker Advance III-400 and Advance III-600 in solvents as indicated. Chemical shift are reported in parts per million from tetramethylsilane (TMS) with the solvent resonance as internal standard ( $\text{CDCl}_3$ :  $^1\text{H}$  NMR:  $\delta = 7.26$ ;  $^{13}\text{C}$  NMR:  $\delta = 77.0$ ). Coupling constants are reported in Hz with multiplicities denoted as s (singlet), d (doublet), t (triplet), q (quartet), and m (multiplet). IR spectra were recorded on a Bruker Tensor 27 spectrometer and only major peaks are reported in  $\text{cm}^{-1}$ . High-resolution mass spectrometry (HRMS) spectra were obtained on a WATERS I-Class VION IMS Q-ToF. Unless otherwise stated, all reagents were purchased from commercial sources and used without further purification.

## Starting Materials

All of cycloalkyl silyl peroxides **1** were prepared from the corresponding cycloalkyl alcohols according to the literature.<sup>1,2</sup> All of the NMR spectra of known compounds were in full accordance with the data in the literature.

## Optimization of Reaction Conditions

### General Procedure for the Alkyl-Heck-type Coupling of Cyclopentyl Silyl Peroxide **1a** with Styrene **2a**

#### Silyl Peroxide **1a** with Styrene **2a**

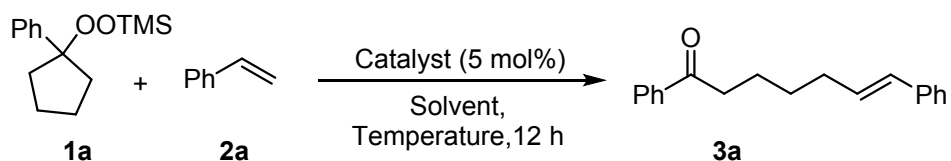

An 10 mL oven-dried Schlenk-tube equipped with a magnetic stirrer was charged with  $\text{Fe}(\text{OTf})_2$  (5 mol %). Then, the tube was evacuated and backfilled with nitrogen for three times. Subsequently, a solution of cyclopentyl silyl peroxide **1a** (1.0 equiv.), styrene **2a** in solvent (See Table S1) was added by syringe under nitrogen. The tube was then sealed and the mixture was stirred at specified temperature for 12 h. After that, the resulting mixture was quenched with  $\text{H}_2\text{O}$  and extracted with EtOAc (3 x 10 mL). The combined organic phase was washed with brine (10 mL), dried over  $\text{Na}_2\text{SO}_4$ , and concentrated in vacuo. The residue was purified by flash column chromatography on silica gel (gradient eluent of EtOAc/petroleum ether = 1:50) to give the product **3a** as colorless oil. The results are summarized as following.

**Table S1. Optimization of the reaction of cyclopentyl silyl peroxide **1a** with styrene **2a**<sup>a</sup>**

**Solvent**

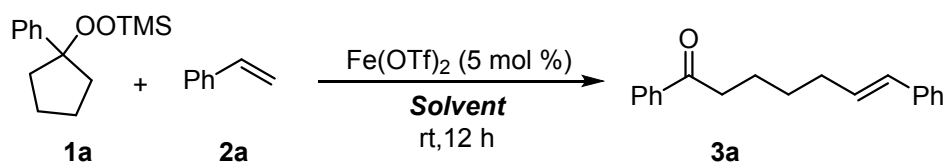

| Entry    | Solvent                | Yield (%) <sup>b</sup> |
|----------|------------------------|------------------------|
| 1        | DMF                    | trace                  |
| 2        | DMAc                   | 35                     |
| 3        | $\text{CH}_3\text{CN}$ | 41                     |
| 4        | DMSO                   | trace                  |
| 5        | THF                    | 29                     |
| 6        | DME                    | 30                     |
| 7        | MTBE                   | 30                     |
| <b>8</b> | <b>1,4-dioxane</b>     | <b>59</b>              |
| 9        | DCE                    | 8                      |
| 10       | Cyclohexane            | 28                     |

<sup>a</sup>Reaction conditions: 5 mol % of  $\text{Fe}(\text{OTf})_2$ , **1a** (0.2 mmol, 1.0 equiv.), **2a** (0.3 mmol, 1.5 equiv.), solvent (1.0 mL), room temperature, for 12 h, under  $\text{N}_2$ . <sup>b</sup>Yields of isolated product of **3a**.

**Catalyst**

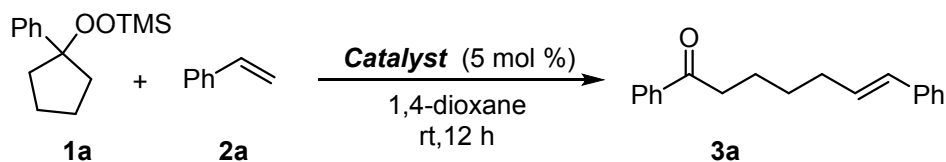

| Entry    | Catalyst                                             | Yield (%) <sup>b</sup> |
|----------|------------------------------------------------------|------------------------|
| <b>1</b> | <b><math>\text{Fe}(\text{OTf})_2</math></b>          | <b>59</b>              |
| 2        | $\text{Fe}(\text{OTs})_2$                            | trace                  |
| 3        | $\text{FeBr}_2$                                      | trace                  |
| 4        | $\text{Fe}(\text{OAc})_2$                            | trace                  |
| 5        | $\text{FeSO}_4 \cdot 7\text{H}_2\text{O}$            | trace                  |
| 6        | $\text{Fe}(\text{OTf})_3$                            | 56                     |
| 7        | $\text{FeCl}_3$                                      | trace                  |
| 8        | $\text{Fe}(\text{NO}_3)_3 \cdot 9\text{H}_2\text{O}$ | trace                  |
| 9        | $\text{Cu}(\text{OTf})$                              | 51                     |
| 10       | $\text{Cu}(\text{OTf})_2$                            | 25                     |
| 11       | $\text{CuCl}$                                        | trace                  |
| 12       | $\text{CuI}$                                         | trace                  |
| 13       | $\text{NiCl}_2 \cdot \text{glyme}$                   | n.r.                   |
| 14       | $\text{CoCl}_2$                                      | n.r.                   |

<sup>a</sup>Reaction conditions: 5 mol % of catalyst, **1a** (0.2 mmol, 1.0 equiv.), **2a** (0.3 mmol, 1.5 equiv.), 1,4-dioxane (1.0 mL), room temperature, for 12 h, under N<sub>2</sub>. <sup>b</sup>Yields of isolated product of **3a**.

### Concentration

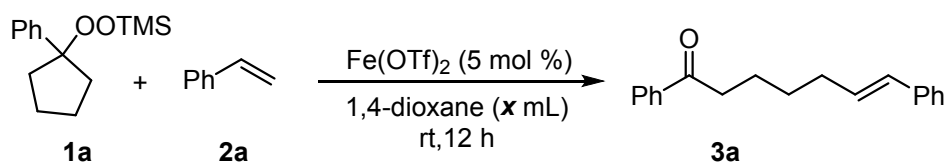

| Entry | Solvent/mL | Yield (%) <sup>b</sup> |
|-------|------------|------------------------|
| 1     | 1.0        | 59                     |
| 2     | 2.0        | 77                     |
| 3     | 5.0        | 73                     |

<sup>a</sup>Reaction conditions: 5 mol % of Fe(OTf)<sub>2</sub>, **1a** (0.2 mmol, 1.0 equiv.), **2a** (0.3 mmol, 1.5 equiv.), 1,4-dioxane (x mL), room temperature, for 12 h, under N<sub>2</sub>. <sup>b</sup>Yields of isolated product of **3a**.

### Ratio of 1a:2a

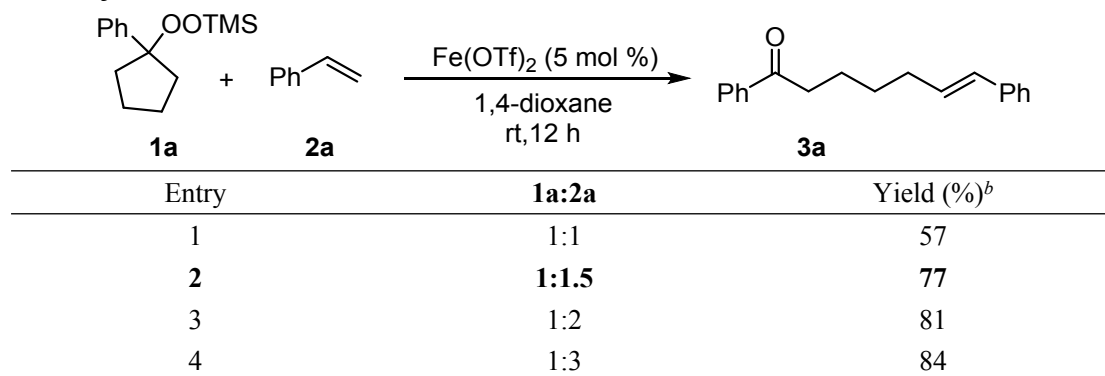

<sup>a</sup>Reaction conditions: 5 mol % of Fe(OTf)<sub>2</sub>, **1a** (0.2 mmol, 1.0 equiv.), **1a:2a** = 1:x, 1,4-dioxane (2.0 mL), room temperature, for 12 h, under N<sub>2</sub>. <sup>b</sup>Yields of isolated product of **3a**.

### Additives

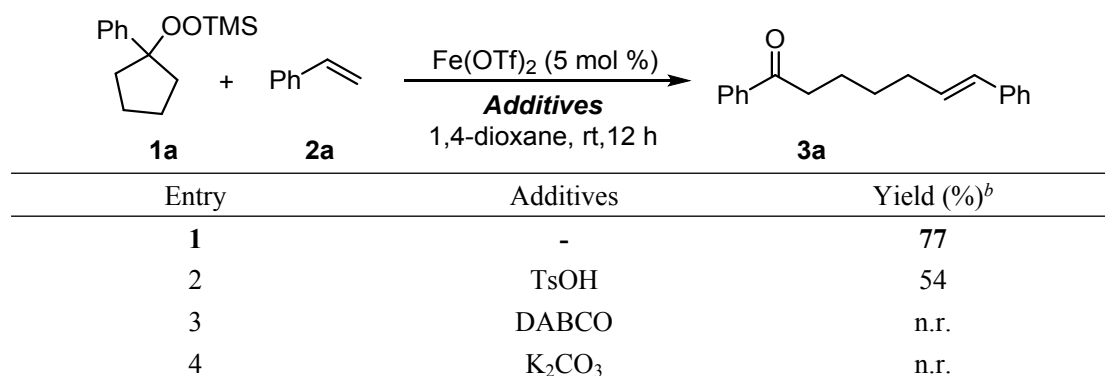

<sup>a</sup>Reaction conditions: 5 mol % of Fe(OTf)<sub>2</sub>, **1a** (0.2 mmol, 1.0 equiv.), **2a** (0.3 mmol, 1.5 equiv.), 1,4-dioxane (2.0 mL), additives (0.4 mmol, 2.0 equiv.), room temperature, for 12 h, under N<sub>2</sub>. <sup>b</sup>Yields of isolated product of **3a**.

### Temperature

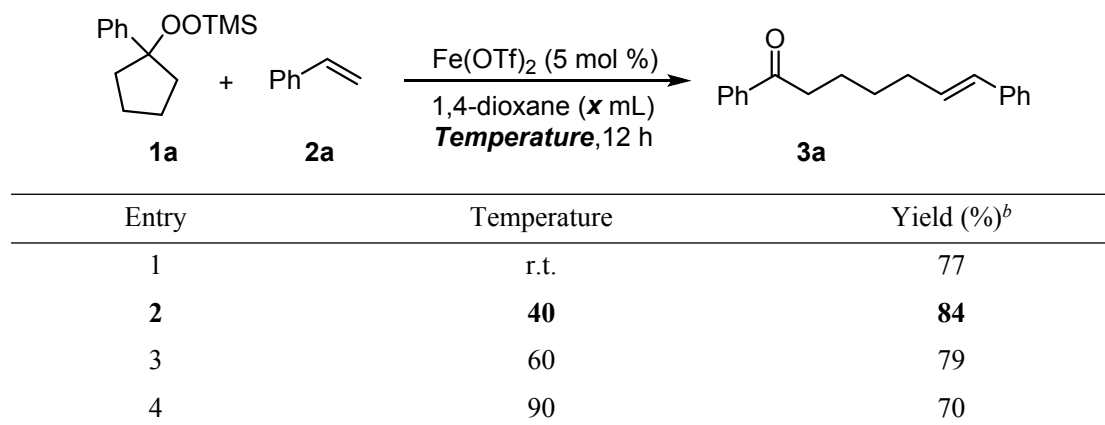

<sup>a</sup>Reaction conditions: 5 mol % of Fe(OTf)<sub>2</sub>, **1a** (0.2 mmol, 1.0 equiv.), **2a** (0.3 mmol, 1.5 equiv.), 1,4-dioxane (2.0 mL), temperature, for 12 h, under N<sub>2</sub>. <sup>b</sup>Yields of isolated product of **3a**.

## General Procedure for the Oxyalkylation of 4-Methoxystyrene **2b** with Cyclopentyl Silyl Peroxide **1a** and Methanol

An 10 mL oven-dried Schlenk-tube equipped with a magnetic stirrer was charged with 5 mol % of Fe(OTf)<sub>2</sub>. Then, the tube was evacuated and backfilled with nitrogen for three times. Subsequently, a solution of cyclopentyl silyl peroxide **1a** (0.20 mmol, 1.0 equiv.), 4-methoxystyrene **2b** (0.30 mmol, 1.5 equiv.), methanol (See Table S2) in 1,4-dioxane (2.0 mL) was added by syringe under nitrogen. The tube was then sealed and the mixture was stirred at 40 °C for 12 h. After that, the resulting mixture was quenched with H<sub>2</sub>O and extracted with CH<sub>2</sub>Cl<sub>2</sub> (3 x 10 mL). The combined organic phase was washed with brine (10 mL), dried over Na<sub>2</sub>SO<sub>4</sub>, and concentrated under reduced pressure. The residue was purified by flash column chromatography on silica gel (gradient eluent of EtOAc/petroleum ether = 1:50) to give the product **5a** as colorless oil. The results are summarized as following.

**Table S2. Optimization of the reaction of cyclopentyl silyl peroxide **1a** with 4-Methoxystyrene **2b** and methanol**

**Ratio of methanol<sup>a</sup>**

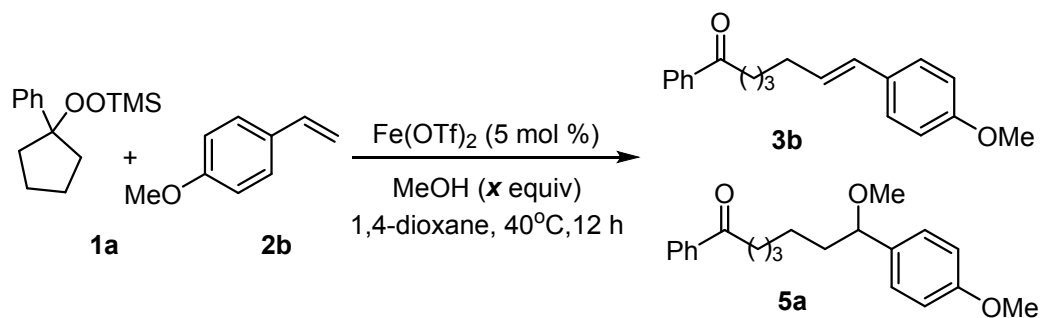

| Entry | Nucleophile (equiv.) | Yield (%) <sup>b/c</sup> |
|-------|----------------------|--------------------------|
| 1     | 1.5                  | 12/70                    |
| 2     | 3.0                  | 9/74                     |
| 3     | <b>5.0</b>           | <b>trace/86</b>          |
| 4     | 10.0                 | trace/88                 |

<sup>a</sup>Reaction conditions: 5 mol % of  $\text{Fe}(\text{OTf})_2$ , **1a** (0.2 mmol, 1.0 equiv.), **2b** (0.3 mmol, 1.5 equiv.), 1,4-dioxane (2.0 mL), MeOH ( $x$  equiv.), 40°C, for 12 h, under  $\text{N}_2$ . <sup>b</sup>Yields of isolated product of **3b**. <sup>c</sup>Yields of isolated product of **5a**.



## **Representative Procedure for the Alkyl-Heck-type Couplings of Cycloalkyl Silyl Peroxides **1** with Olefins **2****

An 10 mL oven-dried Schlenk-tube equipped with a magnetic stirrer was charged with Fe(OTf)<sub>2</sub> (5 mol %). Then, the tube was evacuated and backfilled with nitrogen for three times. Subsequently, a solution of cycloalkyl silyl peroxide **1** (0.20 mmol, 1.0 equiv.), olefins **2** (0.30 mmol, 1.5 equiv.) in 1,4-dioxane (2 mL) was added by syringe under nitrogen. The tube was then sealed and the mixture was stirred at 40 °C for 12 h. After that, the resulting mixture was quenched with H<sub>2</sub>O and extracted with EtOAc (3 x 10 mL). The combined organic phase was washed with brine (10 mL), dried over Na<sub>2</sub>SO<sub>4</sub>, and concentrated in vacuo. The residue was purified by flash column chromatography on silica gel (gradient eluent of EtOAc/petroleum ether = 1:50) to give the product **3** or **4** in yields listed in Schemes 1 and 2.

## **Representative Procedure for the Oxyalkylation of Olefins **2** with Cycloalkyl Silyl Peroxides **1** and Nucleophiles**

An 10 mL oven-dried Schlenk-tube equipped with a magnetic stirrer was charged with 5 mol % of Fe(OTf)<sub>2</sub>. Then, the tube was evacuated and backfilled with nitrogen for three times. Subsequently, a solution of cycloalkyl silyl peroxides **1** (0.20 mmol, 1.0 equiv.), olefins **2** (0.30 mmol, 1.5 equiv.), nucleophiles (1.0 mmol, 5.0 equiv.) in 1,4-dioxane (2.0 mL) was added by syringe under nitrogen. The tube was then sealed and the mixture was stirred at 40 °C for 12 h. After that, the resulting mixture was quenched with H<sub>2</sub>O and extracted with CH<sub>2</sub>Cl<sub>2</sub> (3 x 10 mL). The combined organic phase was washed with brine (10 mL), dried over Na<sub>2</sub>SO<sub>4</sub>, and concentrated under reduced pressure. The residue was purified by flash column chromatography on silica gel (gradient eluent of EtOAc/petroleum ether = 1:50) to give the product **5** in yields listed in Scheme 3.

**Larger Scale for the Reaction of Cyclopentyl Silyl Peroxide 1a with Styrene 2a**

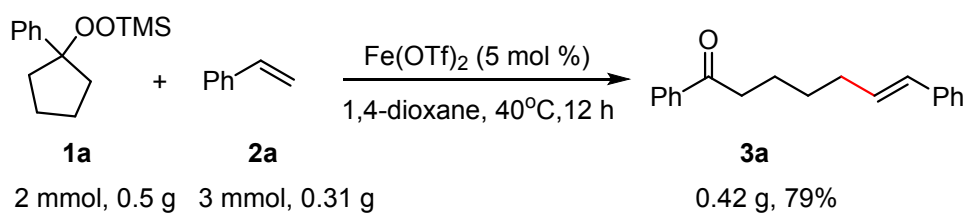

An 100 mL oven-dried sealed tube equipped with a magnetic stirring bar was charged with  $\text{Fe(OTf)}_2$  (5 mol %). Then, the tube was evacuated and backfilled with nitrogen for three times. Subsequently, a solution of cyclopentyl silyl peroxide **1a** (2 mmol, 1.0 equiv, 0.50 g), styrene **2a** (3 mmol, 1.5 equiv, 0.31 g) in 1,4-dioxane (20 mL) was added by syringe under nitrogen. The tube was then sealed and the mixture was stirred at 40°C for 24 h. After that, the resulting mixture was quenched with  $\text{H}_2\text{O}$  and extracted with EtOAc (3 x 30 mL). The combined organic phase was washed with brine (30 mL), dried over  $\text{Na}_2\text{SO}_4$ , and concentrated in vacuo. The resulting residue was purified by column chromatography on silica gel (gradient eluent of EtOAc/petroleum ether = 1:50) to obtain the product **3a** (0.42 g, 79%).

## Larger Scale for the Reaction of Cyclopentyl Silyl Peroxide **1a** with 4-Methoxystyrene **2b** and Methanol

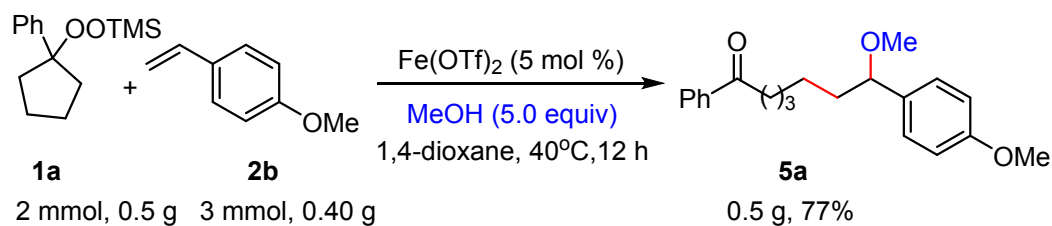

An 100 mL oven-dried Schlenk-tube equipped with a magnetic stirrer was charged with  $\text{Fe}(\text{OTf})_2$  (5 mol %). Then, the tube was evacuated and backfilled with nitrogen for three times. Subsequently, a solution of cyclopentyl silyl peroxide **1a** (2 mmol, 1.0 equiv, 0.50 g), 4-methoxystyrene **2b** (3 mmol, 1.5 equiv, 0.40 g), methanol (10 mmol, 5.0 equiv, 0.32 g) in 1,4-dioxane (20 mL) was added by syringe under nitrogen. The tube was then sealed and the mixture was stirred at  $40^\circ\text{C}$  for 24 h. After that, the resulting mixture was quenched with  $\text{H}_2\text{O}$  and extracted with  $\text{CH}_2\text{Cl}_2$  (3 x 30 mL). The combined organic phase was washed with brine (30 mL), dried over  $\text{Na}_2\text{SO}_4$ , and concentrated under reduced pressure. The resulting residue was purified by column chromatography on silica gel (gradient eluent of EtOAc/petroleum ether = 1:50) to obtain the product **5a** (0.50 g, 77%).

## Investigation of the Reaction Mechanism

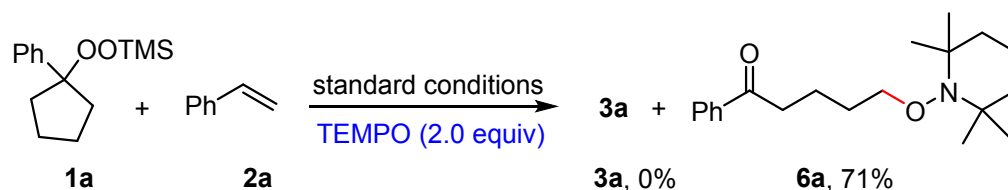

When 2.0 equiv of TEMPO was added to the reaction of **1a** with **2a** under the standard conditions, no desired product **3a** was observed and the corresponding TEMPO-adduct **6a** was obtained in 71 % yield. These results indicate that a radical intermediate might be involved in this transformation.

**1-Phenyl-5-((2,2,6,6-tetramethylpiperidin-1-yl)oxy)pentan-1-one (6a):** (known compound)<sup>1b,2</sup>; Colorless oil; (71%, 45.0 mg);  $R_f = 0.3$  (EtOAc/petroleum ether = 1:30);  $^1\text{H NMR}$  (400 MHz,  $\text{CDCl}_3$ )  $\delta$  7.96 (d,  $J = 7.6$  Hz, 2H), 7.55 (t,  $J = 7.3$  Hz, 1H), 7.46 (t,  $J = 7.6$  Hz, 2H), 3.78 (t,  $J = 6.4$  Hz, 2H), 3.01 (t,  $J = 7.4$  Hz, 2H), 1.88 – 1.80 (m, 2H), 1.66 – 1.59 (m, 2H), 1.50 – 1.40 (m, 5H), 1.32 – 1.28 (m, 1H), 1.15 (s, 6H), 1.08 (s, 6H);  $^{13}\text{C NMR}$  (100 MHz,  $\text{CDCl}_3$ )  $\delta = 200.3, 137.0, 132.8, 128.5, 128.0, 76.4, 59.6, 39.5, 38.6, 33.0, 28.4, 21.4, 20.1, 17.1$  ppm.

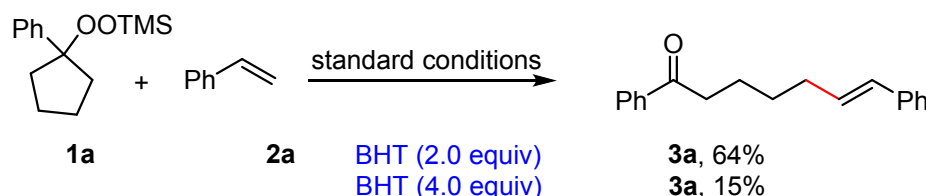

Moreover, when 2.0 equiv or 4.0 equiv of BHT was added to the reaction of **1a** with **2a**, both of them led to a decreased yield of **3a**. These results also support a radical pathway for this transformation.

### Characterization of Products 3

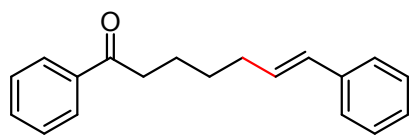

**1,7-Diphenylhept-6-en-1-one (3a):** (known compound)<sup>b</sup>, Colorless oil; (84%, 44.5 mg); *E/Z* > 99:1;  $R_f$  = 0.45 (EtOAc/petroleum ether = 1:20);  $^1\text{H}$  NMR (400 MHz,  $\text{CDCl}_3$ )  $\delta$  7.97 – 7.90 (m, 2H), 7.54 – 7.49 (m, 1H), 7.44 – 7.40 (m, 2H), 7.33 – 7.22 (m, 4H), 7.19 – 7.13 (m, 1H), 6.38 (d,  $J$  = 15.8 Hz, 1H), 6.20 (dt,  $J$  = 16.0, 6.8 Hz, 1H), 2.97 (t,  $J$  = 7.3 Hz, 2H), 2.28 – 2.20 (m, 2H), 1.83 – 1.75 (m, 2H), 1.59 – 1.50 (m, 2H);  $^{13}\text{C}$  NMR (100 MHz,  $\text{CDCl}_3$ )  $\delta$  = 200.3, 137.7, 137.0, 132.9, 130.4, 130.1, 128.5, 128.4, 128.0, 126.8, 125.9, 38.4, 32.8, 29.0, 23.9 ppm.

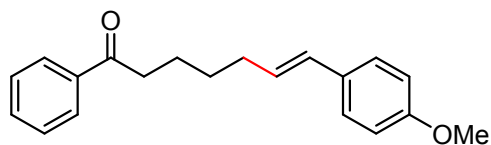

**7-(4-Methoxyphenyl)-1-phenylhept-6-en-1-one (3b):** Colorless oil; (76%, 44.7 mg); *E/Z* > 99:1;  $R_f$  = 0.41 (EtOAc/petroleum ether = 1:20);  $^1\text{H}$  NMR (400 MHz,  $\text{CDCl}_3$ )  $\delta$  7.97 (d,  $J$  = 7.6 Hz, 2H), 7.55 (t,  $J$  = 7.2 Hz, 1H), 7.45 (t,  $J$  = 7.6 Hz, 2H), 7.27 (d,  $J$  = 8.8 Hz, 2H), 6.84 (d,  $J$  = 8.4 Hz, 2H), 6.35 (d,  $J$  = 16.0 Hz, 1H), 6.08 (dt,  $J$  = 15.6, 7.2 Hz, 1H), 3.80 (s, 3H), 3.00 (t,  $J$  = 7.2 Hz, 2H), 2.23 – 2.28 (m, 2H), 1.85 – 1.78 (m, 2H), 1.61 – 1.53 (m, 2H);  $^{13}\text{C}$  NMR (100 MHz,  $\text{CDCl}_3$ )  $\delta$  = 200.4, 158.6, 137.0, 132.9, 130.6, 129.5, 128.5, 128.3, 128.0, 127.0, 113.9, 55.2, 38.4, 32.8, 29.1, 23.9 ppm; IR (neat):  $\nu_{\text{max}}$  2923, 2853, 1725, 1682, 1603, 1508, 1453, 967, 741, 691  $\text{cm}^{-1}$ ; HRMS (ESI) calcd for  $\text{C}_{20}\text{H}_{22}\text{NaO}_2$  [ $\text{M}+\text{Na}$ ]<sup>+</sup>, 317.1512, found 317.1510.

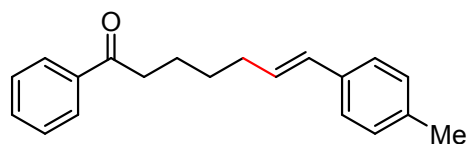

**1-Phenyl-7-(*p*-tolyl)hept-6-en-1-one (3c):** (known compound)<sup>b</sup>, Faint yellow oil; (85%, 47.3 mg); *E/Z* > 99:1;  $R_f$  = 0.30 (EtOAc/petroleum ether = 1:20);  $^1\text{H}$  NMR (400 MHz,  $\text{CDCl}_3$ )  $\delta$  8.01 – 7.94 (m, 2H), 7.59 – 7.53 (m, 1H), 7.46 (t,  $J$  = 7.6 Hz, 2H), 7.24 (d,  $J$  = 8.0 Hz, 2H), 7.11 (t,  $J$  = 6.0 Hz, 2H), 6.38 (d,  $J$  = 16.0 Hz, 1H), 6.18 (dt,  $J$  =

15.6, 6.8 Hz, 1H), 3.01 (t,  $J = 7.2$  Hz, 2H), 2.33 (s, 3H), 2.32 – 2.52 (m, 2H), 1.86 – 1.78 (m, 2H), 1.61 – 1.54 (m, 2H);  $^{13}\text{C}$  NMR (100 MHz,  $\text{CDCl}_3$ )  $\delta = 200.3, 137.0, 136.5, 135.0, 132.9, 130.0, 129.4, 129.1, 128.5, 128.0, 125.8, 38.4, 32.8, 29.1, 23.9, 21.1$  ppm.

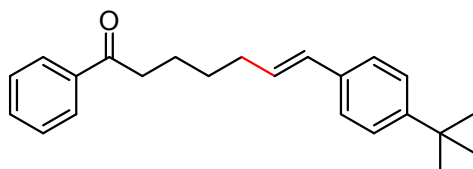

**7-(4-(*tert*-Butyl)phenyl)-1-phenylhept-6-en-1-one (3d):** Yellow oil; (76%, 48.7 mg);  $E/Z > 99:1$ ;  $R_f = 0.34$  (EtOAc/petroleum ether = 1:20);  $^1\text{H}$  NMR (400 MHz,  $\text{CDCl}_3$ )  $\delta$  8.01 – 7.94 (m, 2H), 7.56 (t,  $J = 7.6$  Hz, 1H), 7.46 (t,  $J = 7.6$  Hz, 2H), 7.33 – 7.28 (m, 4H), 6.40 (d,  $J = 16.0$  Hz, 1H), 6.20 (dt,  $J = 15.6, 6.8$  Hz, 1H), 3.01 (t,  $J = 7.2$  Hz, 2H), 2.29 – 2.23 (m, 2H), 1.85 – 1.76 (m, 2H), 1.62 – 1.54 (m, 2H), 1.32 (s, 9H);  $^{13}\text{C}$  NMR (100 MHz,  $\text{CDCl}_3$ )  $\delta = 200.3, 149.8, 137.0, 135.0, 132.9, 129.8, 129.7, 128.5, 128.0, 125.6, 125.3, 38.4, 34.4, 32.8, 31.3, 29.1, 23.9$  ppm; IR (neat):  $\nu_{\text{max}}$  2957, 2866, 1685, 1595, 1510, 1453, 1404, 839, 745, 693  $\text{cm}^{-1}$ ; HRMS (ESI) calcd for  $\text{C}_{23}\text{H}_{28}\text{NaO}$   $[\text{M}+\text{Na}]^+$ , 343.2032, found 343.2030.

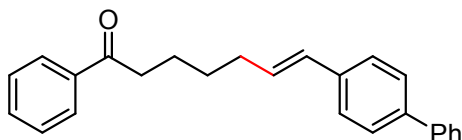

**7-([1,1'-Biphenyl]-4-yl)-1-phenylhept-6-en-1-one (3e):** White solid; (82%, 55.8 mg); mp: 99 – 102  $^{\circ}\text{C}$ ;  $E/Z > 99:1$ ;  $R_f = 0.25$  (EtOAc/petroleum ether = 1:25);  $^1\text{H}$  NMR (600 MHz,  $\text{CDCl}_3$ )  $\delta$  8.01 – 7.93 (m, 2H), 7.62 – 7.58 (m, 2H), 7.58 – 7.53 (m, 3H), 7.47 (t,  $J = 7.8$  Hz, 2H), 7.45 – 7.40 (m, 4H), 7.34 (t,  $J = 7.8$  Hz, 1H), 6.45 (d,  $J = 15.6$  Hz, 1H), 6.28 (dt,  $J = 15.6, 6.6$  Hz, 1H), 3.02 (t,  $J = 7.2$  Hz, 2H), 2.34 – 2.28 (m, 2H), 1.86 – 1.82 (m, 2H), 1.63 – 1.58 (m, 2H);  $^{13}\text{C}$  NMR (150 MHz,  $\text{CDCl}_3$ )  $\delta = 200.3, 140.8, 139.6, 137.0, 136.8, 132.9, 130.7, 129.7, 128.7, 128.6, 128.0, 127.2, 127.1, 126.9, 126.3, 38.4, 32.9, 29.0, 23.9$  ppm; IR (neat):  $\nu_{\text{max}}$  3029, 2927, 2861, 1674, 1590, 1451, 1409, 853, 753, 689  $\text{cm}^{-1}$ ; HRMS (ESI) calcd for  $\text{C}_{25}\text{H}_{24}\text{NaO}$   $[\text{M}+\text{Na}]^+$  363.1719, found 363.1717.

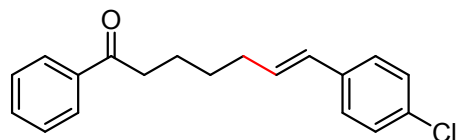

**7-(4-Chlorophenyl)-1-phenylhept-6-en-1-one (3f):** (known compound)<sup>b</sup>, White solid; (73%, 42.8 mg);  $E/Z > 99:1$ ;  $R_f = 0.31$  (EtOAc/petroleum ether = 1:20);  $^1\text{H NMR}$  (400 MHz,  $\text{CDCl}_3$ )  $\delta$  8.02 – 7.93 (m, 2H), 7.56 (t,  $J = 7.2$  Hz, 1H), 7.46 (t,  $J = 8.0$  Hz, 2H), 7.26 – 7.27 (m, 4H), 6.36 (d,  $J = 15.6$  Hz, 1H), 6.28 (dt,  $J = 15.6, 6.6$  Hz, 1H), 3.01 (t,  $J = 7.2$  Hz, 2H), 2.30 – 2.25 (m, 2H), 1.86 – 1.78 (m, 2H), 1.63 – 1.54 (m, 2H);  $^{13}\text{C NMR}$  (100 MHz,  $\text{CDCl}_3$ )  $\delta = 200.2, 137.0, 136.2, 132.9, 132.3, 131.2, 129.0, 128.5, 128.0, 127.1, 38.3, 32.8, 28.9, 23.8$  ppm.

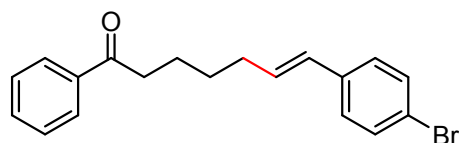

**7-(4-Bromophenyl)-1-phenylhept-6-en-1-one (3g):** (known compound)<sup>b</sup>, White solid; (72%, 49.4 mg);  $E/Z > 99:1$ ;  $R_f = 0.31$  (EtOAc/petroleum ether = 1:20);  $^1\text{H NMR}$  (400 MHz,  $\text{CDCl}_3$ )  $\delta$  7.96 (d,  $J = 7.2$  Hz, 2H), 7.56 (t,  $J = 7.2$  Hz, 1H), 7.46 (t,  $J = 7.6$  Hz, 2H), 7.23 – 7.20 (m, 2H), 7.19 (d,  $J = 8.4$  Hz, 2H), 6.33 (d,  $J = 16.0$  Hz, 1H), 6.22 (dt,  $J = 16.0, 6.8$  Hz, 1H), 3.01 (t,  $J = 7.2$  Hz, 2H), 2.29 – 2.23 (m, 2H), 1.84 – 1.76 (m, 2H), 1.60 – 1.53 (m, 2H);  $^{13}\text{C NMR}$  (100 MHz,  $\text{CDCl}_3$ )  $\delta = 200.3, 136.9, 136.6, 133.0, 131.5, 131.3, 129.0, 128.6, 128.0, 127.5, 120.4, 38.3, 32.8, 28.8, 23.8$  ppm.

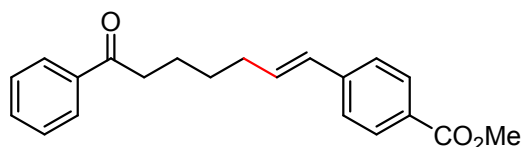

**Methyl 4-(7-oxo-7-phenylhept-1-en-1-yl)benzoate (3h):** Yellow oil; (77%, 49.6 mg);  $E/Z > 99:1$ ;  $R_f = 0.25$  (EtOAc/petroleum ether = 1:15);  $^1\text{H NMR}$  (400 MHz,  $\text{CDCl}_3$ )  $\delta$  7.99 – 7.92 (m, 2H), 7.58 – 7.52 (m, 1H), 7.45 (t,  $J = 8.0$  Hz, 2H), 7.33 (d,  $J = 8.4$  Hz, 2H), 7.01 (d,  $J = 8.8$  Hz, 2H), 6.38 (d,  $J = 16.0$  Hz, 1H), 6.17 (dt,  $J = 16.0, 6.8$  Hz, 1H), 3.00 (t,  $J = 7.6$  Hz, 2H), 2.29 (s, 3H), 2.28 – 2.23 (m, 2H), 1.85 – 1.77 (m, 2H), 1.60 – 1.52 (m, 2H);  $^{13}\text{C NMR}$  (100 MHz,  $\text{CDCl}_3$ )  $\delta = 200.3, 169.5, 149.5, 137.0, 135.6, 132.9, 130.7, 129.2, 128.6, 128.0, 126.8, 121.5, 38.4, 32.8, 29.0, 23.9, 21.1$  ppm; IR (neat):  $\nu_{\text{max}}$  2932, 1760, 1683, 1593, 1505, 1447, 853, 747, 693  $\text{cm}^{-1}$ ; HRMS (ESI) calcd for



C<sub>21</sub>H<sub>22</sub>NaO<sub>3</sub> [M+Na]<sup>+</sup> 345.1461, found 345.1460.

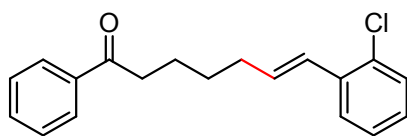

**7-(2-Chlorophenyl)-1-phenylhept-6-en-1-one (3i):** Yellow oil; (77%, 46.1 mg); *E/Z* > 99:1; R<sub>f</sub> = 0.38 (EtOAc/petroleum ether = 1:25); <sup>1</sup>H NMR (400 MHz, CDCl<sub>3</sub>) δ = 7.97 (d, *J* = 7.6 Hz, 2H), 7.56 (t, *J* = 7.6 Hz, 1H), 7.50 – 7.44 (m, 3H), 7.32 (d, *J* = 8.0 Hz, 1H), 7.19 (t, *J* = 7.2 Hz, 1H), 7.13 (t, *J* = 7.6 Hz, 1H), 6.78 (d, *J* = 15.6 Hz, 1H), 6.27 – 6.16 (m, 1H), 3.02 (t, *J* = 7.2 Hz, 2H), 2.35 – 2.30 (m, 2H), 1.87 – 1.79 (m, 2H), 1.64 – 1.58 (m, 2H); <sup>13</sup>C NMR (100 MHz, CDCl<sub>3</sub>) δ = 200.3, 137.0, 135.8, 133.4, 132.9, 132.5, 129.6, 128.6, 128.0, 127.9, 126.7, 126.6, 126.4, 38.4, 33.0, 28.9, 23.9 ppm; IR (neat): ν<sub>max</sub> 3062, 2932, 1684, 1591, 1446, 970, 802, 751, 693 cm<sup>-1</sup>; HRMS (ESI) calcd for C<sub>19</sub>H<sub>19</sub>ClNaO [M+Na]<sup>+</sup> 321.1017, found 321.1016.

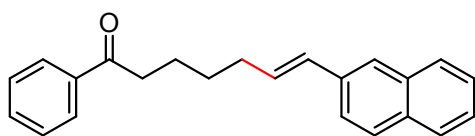

**7-(Naphthalen-2-yl)-1-phenylhept-6-en-1-one (3j):** Yellow oil; (81%, 50.1 mg); *E/Z* > 99:1; R<sub>f</sub> = 0.33 (EtOAc/petroleum ether = 1:25); <sup>1</sup>H NMR (600 MHz, CDCl<sub>3</sub>) δ 7.99 – 7.95 (m, 2H), 7.78 – 7.75 (m, 3H), 7.67 (s, 1H), 7.59 – 7.53 (m, 2H), 7.48 – 7.39 (m, 4H), 6.57 (d, *J* = 15.6 Hz, 1H), 6.36 (dt, *J* = 16.2, 6.6 Hz, 1H), 3.03 (t, *J* = 7.2 Hz, 2H), 2.36 – 2.31 (m, 2H), 1.87 – 1.82 (m, 2H), 1.65 – 1.60 (m, 2H); <sup>13</sup>C NMR (150 MHz, CDCl<sub>3</sub>) δ = 200.33, 137.01, 135.20, 133.68, 132.92, 132.65, 130.95, 130.27, 128.56, 128.04, 128.03, 127.81, 127.60, 126.09, 125.44, 125.36, 123.54, 38.42, 32.97, 29.05, 23.92 ppm; IR (neat): ν<sub>max</sub> 3056, 2930, 2854, 1681, 1626, 1597, 1580, 1508, 1448, 1409, 811, 659 cm<sup>-1</sup>; HRMS (ESI) calcd for C<sub>23</sub>H<sub>22</sub>NaO [M+Na]<sup>+</sup> 337.1563, found 337.1559.

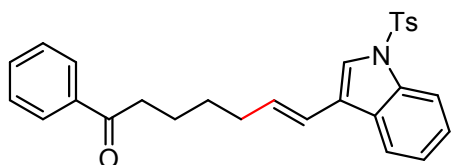

**1-Phenyl-7-(1-tosyl-1H-indol-3-yl)hept-6-en-1-one (3k):** Faint yellow oil; (28%,

25.6 mg); *E/Z* > 99:1;  $R_f$  = 0.23 (EtOAc/petroleum ether = 1:15);  $^1\text{H}$  NMR (400 MHz,  $\text{CDCl}_3$ )  $\delta$  7.99 – 7.95 (m, 3H), 7.76 (d,  $J$  = 8.0 Hz, 2H), 7.70 (d,  $J$  = 7.6 Hz, 1H), 7.56 (t,  $J$  = 7.3 Hz, 1H), 7.51 (s, 1H), 7.45 (t,  $J$  = 7.6 Hz, 2H), 7.32 (t,  $J$  = 7.4 Hz, 1H), 7.25 – 7.19 (m, 3H), 6.45 (d,  $J$  = 16.4 Hz, 1H), 6.32 – 6.23 (m, 1H), 3.02 (t,  $J$  = 7.2 Hz, 2H), 2.32 (s, 3H), 2.31 – 2.27 (m, 2H), 1.87 – 1.79 (m, 2H), 1.63 – 1.56 (m, 2H);  $^{13}\text{C}$  NMR (100 MHz,  $\text{CDCl}_3$ )  $\delta$  = 200.3, 144.9, 136.9, 135.1, 132.9, 132.1, 129.8, 129.2, 128.6, 128.0, 126.8, 124.7, 123.3, 122.8, 120.9, 120.5, 120.3, 113.7, 38.4, 33.3, 29.0, 23.8, 21.5 ppm; IR (neat):  $\nu_{\text{max}}$  3394, 2925, 2315, 1686, 1521, 756, 685  $\text{cm}^{-1}$ ; HRMS (ESI) calcd for  $\text{C}_{28}\text{H}_{27}\text{NNaO}_3\text{S}$   $[\text{M}+\text{Na}]^+$  480.1604, found 480.1609.

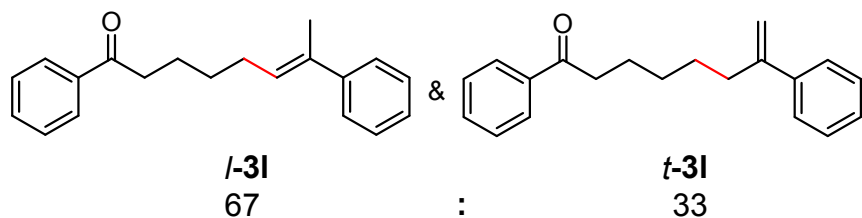

**1,7-Diphenyloct-6-en-1-one (*l*-31) and 1,7-diphenyloct-7-en-1-one (*t*-31):** (known compound)<sup>b</sup>, Yellow oil; (98%, 54.5 mg); *l/t* = 67:33;  $R_f$  = 0.43 (EtOAc/petroleum ether = 1:25);  $^1\text{H}$  NMR (400 MHz,  $\text{CDCl}_3$ )  $\delta$  8.01 – 7.92 (m, 3H), 7.58 – 7.54 (m, 1.5H), 7.48 – 7.45 (m, 3H), 7.43 – 7.35 (m, 3H), 7.35 – 7.28 (m, 3H), 7.25 – 7.20 (m, 1.5H), 5.83 – 5.76 (m, 1H), 5.27 (d,  $J$  = 1.2 Hz, 0.5H), 5.06 (d,  $J$  = 1.2 Hz, 0.5H), 3.01 (t,  $J$  = 7.6 Hz, 2H), 2.95 (t,  $J$  = 7.2 Hz, 1H), 2.53 (t,  $J$  = 7.2 Hz, 1H), 2.30 – 2.24 (m, 2H), 2.05 (s, 3H), 1.87 – 1.81 (m, 2H), 1.79 – 1.71 (m, 1H), 1.61 – 1.51 (m, 3H), 1.48 – 1.40 (m, 1H);  $^{13}\text{C}$  NMR (100 MHz,  $\text{CDCl}_3$ )  $\delta$  = 200.42, 200.35, 148.46, 143.87, 141.27, 137.01, 134.95, 132.89, 132.86, 128.54, 128.52, 128.22, 128.11, 128.07, 128.02, 127.25, 126.47, 126.09, 125.58, 112.23, 38.46, 35.13, 29.28, 28.93, 28.60, 27.99, 24.08, 15.81 ppm.

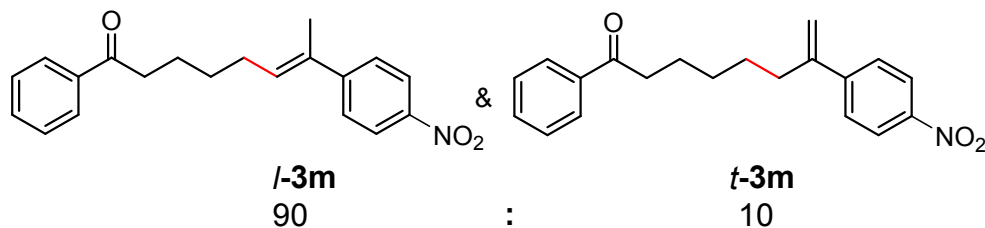

**7-(4-Nitrophenyl)-1-phenyloct-6-en-1-one (*l*-3m) and 7-(4-Nitrophenyl)-1-phenyloct-7-en-1-one (*t*-3m):** Yellow oil; (76%, 49.0 mg); *l/t* = 90:10;  $R_f$  = 0.42

(EtOAc/petroleum ether = 1:15); **l-3m**:  $^1\text{H}$  NMR (400 MHz,  $\text{CDCl}_3$ )  $\delta$  8.18 – 8.14 (m, 2H), 7.97 – 7.93 (m, 2H), 7.58 – 7.53 (m, 1H), 7.52 – 7.43 (m, 4H), 6.01 – 5.90 (m, 1H), 3.02 (t,  $J = 7.2$  Hz, 2H), 2.33 – 2.27 (m, 2H), 2.07 (s, 3H), 1.87 – 1.77 (m, 2H), 1.65 – 1.52 (m, 2H);  $^{13}\text{C}$  NMR (100 MHz,  $\text{CDCl}_3$ )  $\delta = 200.1, 150.3, 146.2, 137.0, 133.6, 133.0, 132.3, 128.6, 128.0, 126.1, 123.5, 38.3, 29.0, 28.9, 24.0, 15.6$  ppm; IR (neat):  $\nu_{\text{max}}$  3448, 2315, 1627, 1382, 746, 664  $\text{cm}^{-1}$ ; HRMS (ESI) calcd for  $\text{C}_{20}\text{H}_{22}\text{NO}_3$   $[\text{M}+\text{H}]^+$  324.1594, found 324.1589.

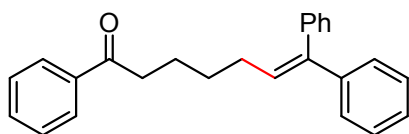

**1,7,7-Triphenylhept-6-en-1-one (3n)**: Yellow oil; (76%, 51.8 mg);  $E/Z > 99:1$ ;  $R_f = 0.35$  (EtOAc/petroleum ether = 1:25);  $^1\text{H}$  NMR (400 MHz,  $\text{CDCl}_3$ )  $\delta$  7.93 – 7.89 (m, 2H), 7.56 – 7.51 (m, 1H), 7.45 – 7.41 (m, 2H), 7.37 – 7.32 (m, 2H), 7.30 – 7.26 (m, 2H), 7.23 – 7.20 (m, 3H), 7.20 (m, 1H), 7.18 – 7.15 (m, 2H), 6.08 (t,  $J = 7.2$  Hz, 1H), 2.89 (t,  $J = 7.6$  Hz, 2H), 2.20 – 2.14 (m, 2H), 1.78 – 1.71 (m, 2H), 1.58 – 1.51 (m, 2H);  $^{13}\text{C}$  NMR (100 MHz,  $\text{CDCl}_3$ )  $\delta = 200.27, 142.68, 141.91, 140.16, 137.01, 132.85, 129.88, 129.49, 128.51, 128.12, 128.03, 128.00, 127.18, 126.85, 126.79, 38.19, 29.43, 29.37, 23.72$  ppm; IR (neat):  $\nu_{\text{max}}$  3451, 3060, 2935, 1682, 1592, 1494, 1449, 757, 698, 643  $\text{cm}^{-1}$ ; HRMS (ESI) calcd for  $\text{C}_{25}\text{H}_{24}\text{NaO}$   $[\text{M}+\text{Na}]^+$  363.1719, found 363.1717.

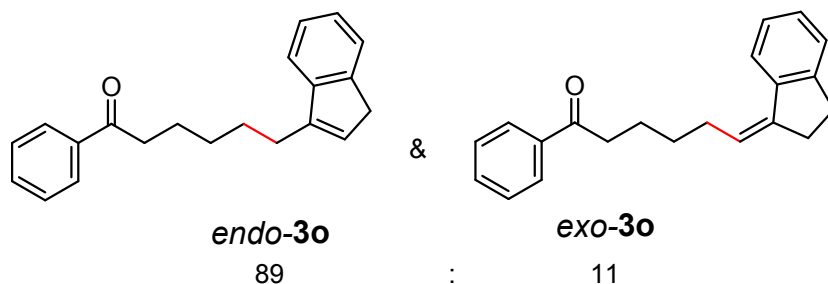

**6-(1H-Inden-3-yl)-1-phenylhexan-1-one (endo-3o) and 6-(2,3-Dihydro-1H-inden-1-ylidene)-1-phenylhexan-1-one (exo-3o)**: Yellow oil; (74%, 42.9 mg);  $endo: exo = 89:11$ ;  $R_f = 0.34$  (EtOAc/petroleum ether = 1:25); **endo-3o**:  $^1\text{H}$  NMR (600 MHz,  $\text{CDCl}_3$ )  $\delta$  7.97 (d,  $J = 7.8$  Hz, 2H), 7.57 – 7.54 (m, 1H), 7.48 – 7.45 (m, 3H), 7.37 (d,  $J = 7.2$  Hz, 1H), 7.30 (t,  $J = 7.2$  Hz, 1H), 7.20 (t,  $J = 7.2$  Hz, 1H), 6.21 (s, 1H), 3.33 (d,  $J = 1.2$  Hz, 2H), 2.99 (t,  $J = 7.2$  Hz, 2H), 2.60 – 2.56 (m, 2H), 1.84 – 1.79 (m, 2H), 1.79

– 1.73 (m, 2H), 1.55 – 1.49 (m, 2H);  $^{13}\text{C}$  NMR (100 MHz,  $\text{CDCl}_3$ )  $\delta$  = 200.5, 145.5, 144.5, 144.4, 137.1, 132.9, 128.5, 128.0, 127.8, 125.9, 124.4, 123.7, 118.9, 38.5, 37.7, 29.3, 27.8, 27.6, 24.2 ppm; IR (neat):  $\nu_{\text{max}}$  3062, 2935, 1682, 1593, 1453, 804, 693  $\text{cm}^{-1}$ ; HRMS (ESI) calcd for  $\text{C}_{21}\text{H}_{22}\text{NaO}$   $[\text{M}+\text{Na}]^+$  313.1563, found 313.1570.

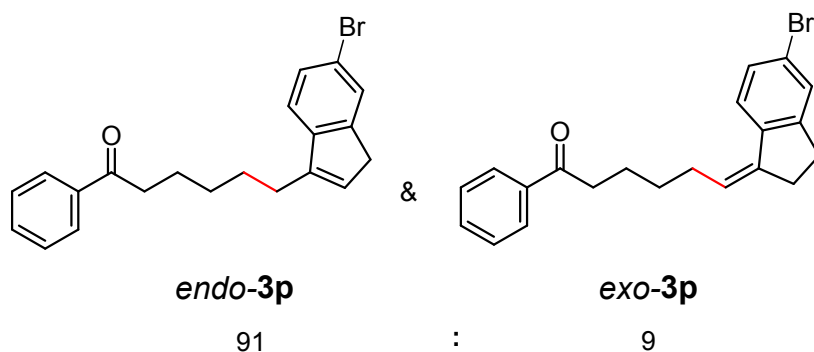

**6-(6-Bromo-1H-inden-3-yl)-1-phenylhexan-1-one (endo-3p) and 6-(5-Bromo-2,3-dihydro-1H-inden-1-ylidene)-1-phenylhexan-1-one (exo-3p):** Yellow oil; (71%, 52.4 mg); *endo*: *exo* = 91:9;  $R_f$  = 0.35 (EtOAc/petroleum ether = 1:20); **endo-3p**:  $^1\text{H}$  NMR (400 MHz,  $\text{CDCl}_3$ )  $\delta$  7.96 (d,  $J$  = 7.2 Hz, 2H), 7.59 – 7.53 (m, 2H), 7.48 – 7.44 (m, 2H), 7.41 (d,  $J$  = 8.4 Hz, 1H), 7.20 (d,  $J$  = 8.0 Hz, 1H), 6.18 (s, 1H), 3.30 (s, 2H), 2.98 (t,  $J$  = 7.6 Hz, 2H), 2.53 (t,  $J$  = 6.8 Hz, 2H), 1.84 – 1.76 (m, 2H), 1.76 – 1.68 (m, 2H), 1.54 – 1.44 (m, 2H);  $^{13}\text{C}$  NMR (100 MHz,  $\text{CDCl}_3$ )  $\delta$  = 200.4, 146.6, 144.4, 143.9, 137.0, 132.9, 129.0, 128.5, 128.2, 128.0, 126.9, 120.1, 118.6, 38.5, 37.6, 29.2, 27.8, 27.4, 24.1 ppm; IR (neat):  $\nu_{\text{max}}$  3449, 2931, 1682, 1593, 1454, 803, 752, 691  $\text{cm}^{-1}$ ; HRMS (ESI) calcd for  $\text{C}_{21}\text{H}_{21}\text{BrNaO}$   $[\text{M}+\text{Na}]^+$  391.0668, found 391.0670.

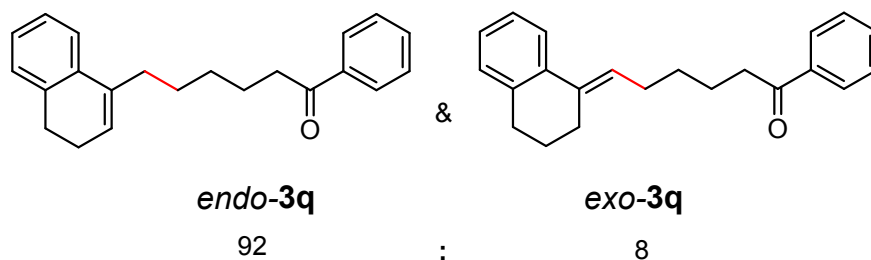

**6-(3,4-Dihydronaphthalen-1-yl)-1-phenylhexan-1-one (endo-3q) and 6-(3,4-Dihydronaphthalen-1(2H)-ylidene)-1-phenylhexan-1-one (exo-3q):** Yellow oil; (83%, 50.5 mg); *endo*: *exo* = 92:8;  $R_f$  = 0.33 (EtOAc/petroleum ether = 1:25); **endo-3q**:  $^1\text{H}$  NMR (400 MHz,  $\text{CDCl}_3$ )  $\delta$  7.99 – 7.93 (m, 2H), 7.58 – 7.54 (m, 1H), 7.46 (t,  $J$  = 7.6 Hz, 2H), 7.26 – 7.24 (m, 1H), 7.23 – 7.17 (m, 1H), 7.14 – 7.13 (m, 2H), 5.85 (t,  $J$  =

4.4 Hz, 1H), 2.98 (t,  $J = 7.6$  Hz, 2H), 2.76 – 2.70 (m, 2H), 2.48 – 2.44 (m, 2H), 2.27 – 2.21 (m, 2H), 1.82 – 1.75 (m, 2H), 1.63 – 1.56 (m, 2H), 1.51 – 1.43 (m, 2H);  $^{13}\text{C}$  NMR (100 MHz,  $\text{CDCl}_3$ )  $\delta = 200.5, 137.1, 136.8, 136.3, 134.9, 132.8, 128.5, 128.0, 127.5, 126.5, 126.2, 124.8, 122.6, 38.5, 32.6, 29.2, 28.4, 28.2, 24.2, 23.1$  ppm; IR (neat):  $\nu_{\text{max}}$  3059, 2933, 1683, 1592, 1450, 803, 750, 693  $\text{cm}^{-1}$ ; HRMS (ESI) calcd for  $\text{C}_{22}\text{H}_{24}\text{NaO}$   $[\text{M}+\text{Na}]^+$  327.1719, found 327.1716.

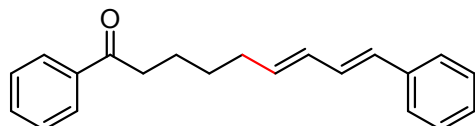

**1,9-Diphenylnona-6,8-dien-1-one (3r):** (known compound)<sup>b</sup>, Colorless oil; (58%, 33.7 mg);  $EE/ZE = 2:1$ ;  $R_f = 0.49$  (EtOAc/petroleum ether = 1:20);  $^1\text{H}$  NMR (400 MHz,  $\text{CDCl}_3$ )  $\delta$  8.01 – 7.92 (m, 2H), 7.58 – 7.53 (m, 1H), 7.49 – 7.44 (m, 2H), 7.42 – 7.36 (m, 2H), 7.34 – 7.28 (m, 2H), 7.24 – 7.17 (m, 1H), 7.07 (dd,  $J = 15.1, 11.5$  Hz, 0.34H), 6.75 (dd,  $J = 15.6, 10.4$  Hz, 0.69H), 6.54 (d,  $J = 15.6$  Hz, 0.32H), 6.45 (d,  $J = 15.7$  Hz, 0.64H), 6.28 – 6.14 (m, 1H), 5.90 – 5.76 (m, 0.66H), 5.57 – 5.50 (m, 0.33H), 3.02 – 2.98 (m, 2H), 2.42 – 2.30 (m, 1H), 2.23 – 2.20 (m, 1H), 1.86 – 1.76 (m, 2H), 1.58 – 1.50 (m, 2H);  $^{13}\text{C}$  NMR (100 MHz,  $\text{CDCl}_3$ )  $\delta = 200.3, 137.6, 137.0, 135.1, 132.9, 132.5, 132.2, 130.9, 130.2, 129.3, 129.1, 128.6, 128.5, 128.0, 127.4, 127.1, 126.3, 126.1, 124.3, 38.4, 38.3, 32.6, 29.3, 29.0, 27.8, 23.9, 23.9$  ppm.

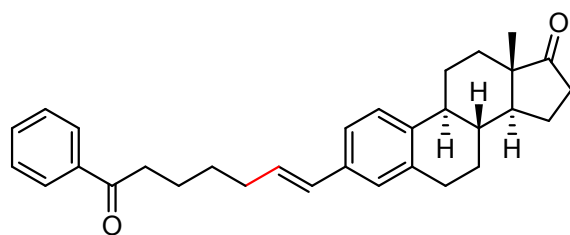

**(8R,9S,13S,14S)-13-Methyl-3-(7-oxo-7-phenylhept-1-en-1-yl)-**

**6,7,8,9,11,12,13,14,15,16-decahydro-17H-cyclopenta[a]phenanthren-17-one (3s):** Colorless oil; (59%, 52.0 mg);  $R_f = 0.15$  (EtOAc/petroleum ether = 1:5);  $^1\text{H}$  NMR (400 MHz,  $\text{CDCl}_3$ )  $\delta$  7.99 – 7.93 (m, 2H), 7.56 (t,  $J = 7.6$  Hz, 1H), 7.46 (t,  $J = 8.0$  Hz, 2H), 7.22 (d,  $J = 8.0$  Hz, 1H), 7.13 (d,  $J = 8.4$  Hz, 1H), 7.08 (s, 1H), 6.35 (d,  $J = 15.6$  Hz, 1H), 6.18 (dt,  $J = 15.6, 6.8$  Hz, 1H), 3.00 (t,  $J = 7.2$  Hz, 2H), 2.91 – 2.88 (m, 2H), 2.54 – 2.47 (m, 1H), 2.45 – 2.38 (m, 1H), 2.29 – 2.23 (m, 3H), 2.20 – 2.12 (m, 1H), 2.10 –

1.94 (m, 3H), 1.84 – 1.76 (m, 2H), 1.66 – 1.60 (m, 2H), 1.57 – 1.42 (m, 6H), 0.91 (s, 3H);  $^{13}\text{C}$  NMR (100 MHz,  $\text{CDCl}_3$ )  $\delta$  = 220.9, 200.3, 138.5, 137.0, 136.5, 135.4, 132.9, 129.9, 129.8, 128.5, 128.0, 126.5, 125.5, 123.4, 50.5, 48.0, 44.4, 38.4, 38.2, 35.8, 32.8, 31.6, 29.4, 29.1, 26.5, 25.7, 23.8, 21.6, 13.8 ppm; IR (neat):  $\nu_{\text{max}}$  3450, 2960, 1734, 1681, 1412, 803, 692  $\text{cm}^{-1}$ ; HRMS (ESI) calcd for  $\text{C}_{31}\text{H}_{36}\text{NaO}_2$   $[\text{M}+\text{Na}]^+$  463.2608, found 463.2606.

## Characterization of Products 4

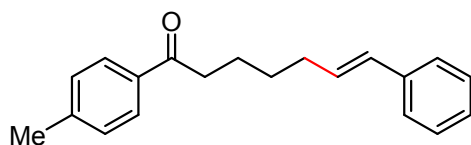

**7-Phenyl-1-(*p*-tolyl)hept-6-en-1-one (4a):** (known compound)<sup>b</sup>, White solid; (88%, 48.9 mg); *E/Z* > 99:1;  $R_f$  = 0.36 (EtOAc/petroleum ether = 1:20); <sup>1</sup>H NMR (400 MHz, CDCl<sub>3</sub>)  $\delta$  7.88 – 7.85 (m, 2H), 7.36 – 7.32 (m, 2H), 7.30 – 7.26 (m, 2H), 7.24 (s, 1H), 7.22 – 7.16 (m, 1H), 6.40 (d, *J* = 16.0 Hz, 1H), 6.23 (dt, *J* = 16.0, 6.8 Hz, 1H), 2.98 (t, *J* = 7.2 Hz, 2H), 2.41 (s, 3H), 2.31 – 2.23 (m, 2H), 1.84 – 1.76 (m, 2H), 1.61 – 1.52 (m, 2H); <sup>13</sup>C NMR (100 MHz, )  $\delta$  = 200.0, 143.7, 134.5, 130.5, 130.1, 129.2, 128.4, 128.2, 126.8, 125.9, 38.3, 32.9, 29.0, 24.0, 21.6 ppm.

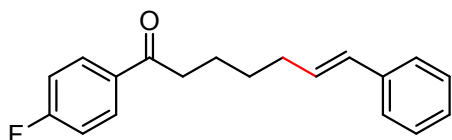

**1-(4-Fluorophenyl)-7-phenylhept-6-en-1-one (4b):** (known compound)<sup>b</sup>, White solid; (85%, 48.1 mg); *E/Z* > 99:1;  $R_f$  = 0.43 (EtOAc/petroleum ether = 1:20); <sup>1</sup>H NMR (600 MHz, CDCl<sub>3</sub>)  $\delta$  8.00 – 7.97 (m, 2H), 7.34 (d, *J* = 7.2 Hz, 2H), 7.30 – 7.27 (m, 2H), 7.20 (d, *J* = 7.2 Hz, 1H), 7.13 – 7.10 (m, 2H), 6.40 (d, *J* = 15.6 Hz, 1H), 6.23 (dt, *J* = 16.2, 6.6 Hz, 1H), 2.97 (t, *J* = 7.2 Hz, 2H), 2.30 – 2.25 (m, 2H), 1.83 – 1.78 (m, 2H), 1.60 – 1.54 (m, 2H); <sup>13</sup>C NMR (150 MHz, CDCl<sub>3</sub>)  $\delta$  = 198.6, 165.6 (d, *J* = 252.0 Hz), 137.7, 133.4 (d, *J* = 3.0 Hz), 130.6 (d, *J* = 9.0 Hz), 130.4, 130.2, 128.5, 126.9, 125.9, 115.6 (d, *J* = 21.8 Hz), 38.3, 32.8, 29.0, 23.8 ppm.

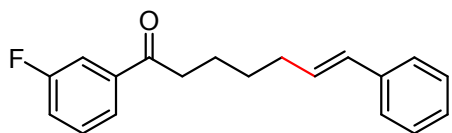

**1-(3-Fluorophenyl)-7-phenylhept-6-en-1-one (4c):** (known compound)<sup>b</sup>, Colorless oil; (93%, 52.5 mg); *E/Z* > 99:1;  $R_f$  = 0.50 (EtOAc/petroleum ether = 1:20); <sup>1</sup>H NMR (600 MHz, CDCl<sub>3</sub>)  $\delta$  7.75 – 7.73 (m, 1H), 7.66 – 7.63 (m, 1H), 7.43 (td, *J* = 7.8, 5.4 Hz, 1H), 7.34 (d, *J* = 7.2 Hz, 2H), 7.29 (t, *J* = 7.8 Hz, 2H), 7.27 – 7.24 (m, 1H), 7.20 (t, *J* = 7.2 Hz, 1H), 6.41 (d, *J* = 15.8 Hz, 1H), 6.23 (dt, *J* = 16.2, 6.6 Hz, 1H), 2.98 (t, *J* =

7.2 Hz, 2H), 2.30 – 2.26 (m, 2H), 1.84 – 1.78 (m, 2H), 1.61 – 1.55 (m, 2H);  $^{13}\text{C}$  NMR (150 MHz,  $\text{CDCl}_3$ )  $\delta$  = 198.92 (d,  $J$  = 2.1 Hz), 162.85 (d,  $J$  = 246.3 Hz), 139.08 (d,  $J$  = 5.9 Hz), 137.68, 130.31, 130.21 (d,  $J$  = 17.6 Hz), 130.18, 128.45, 126.86, 125.91, 123.76 (d,  $J$  = 2.6 Hz), 119.91 (d,  $J$  = 21.1 Hz), 114.76 (d,  $J$  = 22.1 Hz), 38.53, 32.79, 28.92, 23.70 ppm.

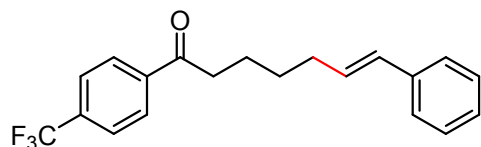

**7-Phenyl-1-(4-(trifluoromethyl)phenyl)hept-6-en-1-one (4d):** (known compound)<sup>b</sup>, White solid; (85%, 55.0 mg);  $E/Z$  > 99:1;  $R_f$  = 0.39 (EtOAc/petroleum ether = 1:20);  $^1\text{H}$  NMR (600 MHz,  $\text{CDCl}_3$ )  $\delta$  8.05 (d,  $J$  = 7.8 Hz, 2H), 7.71 (d,  $J$  = 7.8 Hz, 2H), 7.33 (d,  $J$  = 7.2 Hz, 2H), 7.28 (t,  $J$  = 7.8 Hz, 2H), 7.19 (t,  $J$  = 7.2 Hz, 1H), 6.40 (d,  $J$  = 16.2 Hz, 1H), 6.21 (dt,  $J$  = 15.6, 7.2 Hz, 1H), 3.02 (t,  $J$  = 7.2 Hz, 2H), 2.30 – 2.23 (m, 2H), 1.84 – 1.79 (m, 2H), 1.60 – 1.55 (m, 2H);  $^{13}\text{C}$  NMR (150 MHz,  $\text{CDCl}_3$ )  $\delta$  = 199.21, 139.60, 137.66, 134.24 (q,  $J$  = 32.7 Hz), 130.27, 130.24, 128.48, 128.35, 126.91, 125.91, 125.65 (q,  $J$  = 4.1 Hz), 124.77 (q,  $J$  = 270.8 Hz), 38.70, 32.78, 28.89, 23.62 ppm.

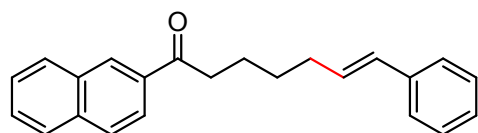

**1-(Naphthalen-2-yl)-7-phenylhept-6-en-1-one (4e):** Yellow oil; (62%, 39.0 mg);  $E/Z$  > 99:1;  $R_f$  = 0.33 (EtOAc/petroleum ether = 1:25);  $^1\text{H}$  NMR (400 MHz,  $\text{CDCl}_3$ )  $\delta$  8.48 (s, 1H), 8.06 – 8.03 (m, 1H), 7.95 (d,  $J$  = 8.0 Hz, 1H), 7.91 – 7.87 (m, 2H), 7.64 – 7.52 (m, 2H), 7.35 (d,  $J$  = 7.2 Hz, 2H), 7.31 – 7.27 (m, 2H), 7.20 (t,  $J$  = 7.2 Hz, 1H), 6.42 (d,  $J$  = 15.6 Hz, 1H), 6.25 (dt,  $J$  = 15.6, 6.4 Hz, 1H), 3.14 (t,  $J$  = 7.2 Hz, 2H), 2.34 – 2.28 (m, 2H), 1.92 – 1.83 (m, 2H), 1.65 – 1.57 (m, 2H);  $^{13}\text{C}$  NMR (100 MHz,  $\text{CDCl}_3$ )  $\delta$  = 200.30, 137.70, 135.48, 134.28, 132.49, 130.46, 130.12, 129.62, 129.51, 128.45, 128.39, 128.34, 127.73, 126.82, 126.69, 125.90, 123.90, 38.47, 32.85, 29.02, 24.04 ppm; IR (neat):  $\nu_{\text{max}}$  3025, 2931, 2858, 1947, 1679, 1630, 1591, 814, 746, 697  $\text{cm}^{-1}$ ; HRMS (ESI) calcd for  $\text{C}_{23}\text{H}_{22}\text{NaO}$  [ $\text{M}+\text{Na}$ ] $^+$  337.1563, found 337.1571.



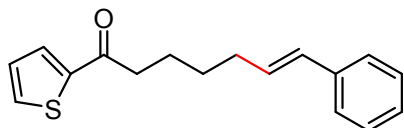

**7-Phenyl-1-(thiophen-2-yl)hept-6-en-1-one (4f):** Yellow oil; (55%, 29.8 mg); *E/Z* > 99:1;  $R_f = 0.35$  (EtOAc/petroleum ether = 1:25);  $^1\text{H NMR}$  (400 MHz,  $\text{CDCl}_3$ )  $\delta$  7.72 – 7.70 (m, 1H), 7.65 – 7.59 (m, 1H), 7.34 – 7.30 (m, 2H), 7.30 – 7.27 (m, 2H), 7.14 – 7.11 (m, 1H), 7.14 – 7.09 (m, 1H), 6.40 (d,  $J = 15.8$  Hz, 1H), 6.22 (dt,  $J = 15.6, 6.8$  Hz, 1H), 2.94 (t,  $J = 7.2$  Hz, 2H), 2.30 – 2.24 (m, 2H), 1.87 – 1.78 (m, 2H), 1.62 – 1.54 (m, 2H);  $^{13}\text{C NMR}$  (100 MHz,  $\text{CDCl}_3$ )  $\delta = 193.3, 144.4, 137.7, 133.4, 131.7, 130.3, 130.1, 128.4, 128.0, 126.8, 125.9, 39.2, 32.8, 28.9, 24.3$  ppm; IR (neat):  $\nu_{\text{max}}$  3024, 2931, 2859, 1662, 1509, 1449, 1415, 1234, 1062, 967, 598  $\text{cm}^{-1}$ ; HRMS (ESI) calcd for  $\text{C}_{17}\text{H}_{18}\text{NaOS}$   $[\text{M}+\text{Na}]^+$  293.0971, found 293.0970.

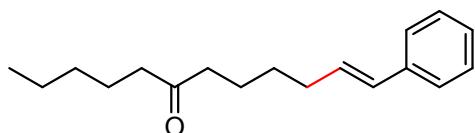

**9-(3-Methoxyphenyl)non-8-en-3-one (4g):** Colorless oil; (78%, 40.3 mg); *E/Z* > 99:1;  $R_f = 0.45$  (EtOAc/petroleum ether = 1:10);  $^1\text{H NMR}$  (600 MHz,  $\text{CDCl}_3$ )  $\delta$  7.33 (d,  $J = 7.2$  Hz, 2H), 7.29 (t,  $J = 7.2$  Hz, 2H), 7.19 (t,  $J = 7.2$  Hz, 1H), 6.38 (d,  $J = 15.6$  Hz, 1H), 6.20 (dt,  $J = 15.6, 6.6$  Hz, 1H), 2.42 (t,  $J = 7.2$  Hz, 2H), 2.39 (t,  $J = 7.2$  Hz, 2H), 2.25 – 2.20 (m, 2H), 1.66 – 1.61 (m, 2H), 1.60 – 1.54 (m, 2H), 1.50 – 1.44 (m, 2H), 1.34 – 1.29 (m, 2H), 1.28 – 1.24 (m, 2H), 0.89 (t,  $J = 7.2$  Hz, 3H);  $^{13}\text{C NMR}$  (150 MHz,  $\text{CDCl}_3$ )  $\delta = 211.4, 137.7, 130.4, 130.1, 128.4, 126.8, 125.9, 42.8, 42.6, 32.8, 31.4, 28.9, 23.5, 23.4, 22.4, 13.9$  ppm; IR (neat):  $\nu_{\text{max}}$  3023, 2931, 2862, 1712, 1454, 1413, 968, 746, 695  $\text{cm}^{-1}$ ; HRMS (ESI) calcd for  $\text{C}_{18}\text{H}_{26}\text{NaO}$   $[\text{M}+\text{Na}]^+$  281.1876, found 281.1879.

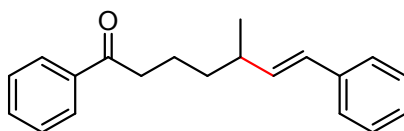

**5-Methyl-1,7-diphenylhept-6-en-1-one (4h):** (known compound)<sup>b</sup>, Colorless oil; (89%, 49.6 mg); *E/Z* > 99:1;  $R_f = 0.43$  (EtOAc/petroleum ether = 1:20);  $^1\text{H NMR}$  (600 MHz,  $\text{CDCl}_3$ )  $\delta$  7.97 – 7.95 (m, 2H), 7.57 – 7.53 (m, 1H), 7.46 – 7.43 (m, 2H), 7.35 (d,  $J = 7.2$  Hz, 2H), 7.30 (t,  $J = 7.2$  Hz, 2H), 7.20 (t,  $J = 7.2$  Hz, 1H), 6.38 (d,  $J = 15.6$  Hz,

1H), 6.11 (dd,  $J = 15.6, 7.8$  Hz, 1H), 3.03 – 2.93 (m, 2H), 2.39 – 2.34 (m, 1H), 1.82 – 1.76 (m, 2H), 1.52 – 1.45 (m, 2H), 1.12 (d,  $J = 6.6$  Hz, 3H);  $^{13}\text{C}$  NMR (150 MHz,  $\text{CDCl}_3$ )  $\delta = 200.36, 137.72, 136.99, 136.31, 132.87, 128.53, 128.43, 128.40, 128.02, 126.82, 125.97, 38.60, 37.24, 36.62, 22.24, 20.66$  ppm.

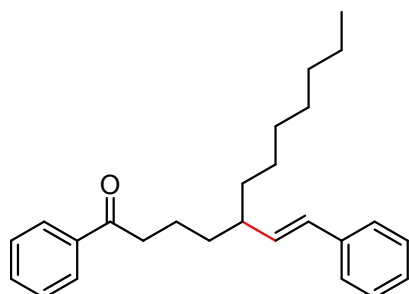

**1-Phenyl-5-styryldodecan-1-one (4i):** Yellow oil; (83%, 60.2 mg);  $E/Z > 99:1$ ;  $R_f = 0.41$  (EtOAc/petroleum ether = 1:25);  $^1\text{H}$  NMR (600 MHz,  $\text{CDCl}_3$ )  $\delta$  7.96 – 7.93 (m, 2H), 7.54 (t,  $J = 7.2$  Hz, 1H), 7.43 (t,  $J = 7.2$  Hz, 2H), 7.35 (d,  $J = 7.2$  Hz, 2H), 7.29 (t,  $J = 7.2$  Hz, 2H), 7.19 (t,  $J = 7.2$  Hz, 1H), 6.36 (d,  $J = 15.6$  Hz, 1H), 5.97 (dd,  $J = 15.6, 9.0$  Hz, 1H), 3.01 – 2.91 (m, 2H), 2.20 – 2.14 (m, 1H), 1.84 – 1.77 (m, 1H), 1.76 – 1.69 (m, 1H), 1.58 – 1.52 (m, 1H), 1.48 – 1.38 (m, 2H), 1.33 – 1.32 (m, 2H), 1.29 – 1.22 (m, 9H), 0.87 (t,  $J = 7.2$  Hz, 3H);  $^{13}\text{C}$  NMR (150 MHz,  $\text{CDCl}_3$ )  $\delta = 200.4, 137.7, 137.0, 135.2, 132.9, 129.9, 128.5, 128.4, 128.0, 126.8, 126.0, 43.4, 38.7, 35.5, 35.1, 31.9, 29.7, 29.3, 27.3, 22.7, 22.3, 14.1$  ppm; IR (neat):  $\nu_{\text{max}}$  2921, 1680, 1450, 966, 879, 753, 686  $\text{cm}^{-1}$ ; HRMS (ESI) calcd for  $\text{C}_{26}\text{H}_{34}\text{NaO}$   $[\text{M}+\text{Na}]^+$  385.2502, found 385.2497.

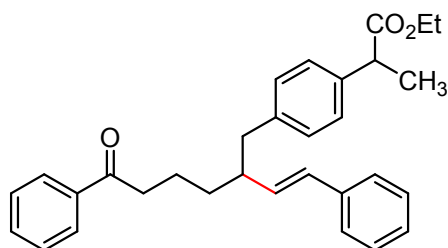

**Ethyl-2-(4-(6-oxo-6-phenyl-2-styrylhexyl)phenyl)propanoate (4j):** (known compound)<sup>b</sup>, Colorless oil; (79%, 71.8 mg);  $E/Z > 99:1$ ; dr = 1:1;  $R_f = 0.17$  (EtOAc/petroleum ether = 1:5);  $^1\text{H}$  NMR (400 MHz,  $\text{CDCl}_3$ )  $\delta$  7.93 – 7.91 (m, 2H), 7.56 – 7.51 (m, 1H), 7.45 – 7.40 (m, 2H), 7.30 – 7.27 (m, 4H), 7.20 – 7.18 (m, 3H), 7.10 (d,  $J = 8.0$  Hz, 2H), 6.28 (d,  $J = 16.0$  Hz, 1H), 6.02 (dd,  $J = 16.0, 8.8$  Hz, 1H), 4.15 – 4.05 (m, 2H), 3.69 – 3.63 (m, 1H), 2.99 – 2.87 (m, 2H), 2.71 (d,  $J = 6.8$  Hz, 2H), 2.52

– 2.44 (m, 1H), 1.86 – 1.78 (m, 1H), 1.75 – 1.66 (m, 1H), 1.63 – 1.58 (m, 1H), 1.56 – 1.50 (m, 1H), 1.47 (d,  $J = 7.2$  Hz, 3H), 1.20 – 1.16 (m, 3H);  $^{13}\text{C}$  NMR (100 MHz,  $\text{CDCl}_3$ )  $\delta = 200.28, 174.72, 174.70, 138.99, 138.16, 138.13, 137.60, 136.99, 133.99, 132.89, 130.36, 129.50, 128.54, 128.43, 128.03, 127.21, 126.93, 126.04, 60.63, 45.17, 45.14, 44.87, 41.76, 38.59, 34.10, 29.69, 22.22, 18.55, 18.50, 14.09$  ppm.

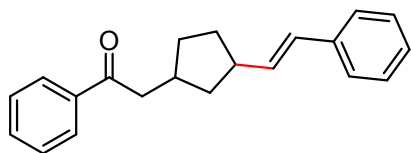

**1-Phenyl-2-(3-styrylcyclopentyl)ethan-1-one (4k):** (known compound)<sup>b</sup>, Colorless oil; (78%, 45.3 mg);  $E/Z > 99:1$ ; dr = 1:1;  $R_f = 0.55$  (EtOAc/petroleum ether = 1:25);  $^1\text{H}$  NMR (400 MHz,  $\text{CDCl}_3$ )  $\delta$  7.98 (d,  $J = 7.2$  Hz, 2H), 7.57 (t,  $J = 7.2$  Hz, 1H), 7.47 (t,  $J = 7.6$  Hz, 2H), 7.34 (d,  $J = 7.2$  Hz, 2H), 7.29 (t,  $J = 7.2$  Hz, 2H), 7.19 (t,  $J = 7.2$  Hz, 1H), 6.37 (dd,  $J = 16.0, 2.8$  Hz, 1H), 6.21 (dd,  $J = 16.0, 8.0$  Hz, 1H), 3.07 – 3.03 (m, 2H), 2.81 – 2.50 (m, 2H), 2.12 – 2.18 (m, 0.54H), 2.09 – 1.88 (m, 2H), 1.86 – 1.78 (m, 0.56H), 1.60 – 1.46 (m, 1H), 1.44 – 1.25 (m, 1.44H), 1.19 – 1.09 (m, 0.56H);  $^{13}\text{C}$  NMR (100 MHz,  $\text{CDCl}_3$ )  $\delta = 200.0, 137.7, 137.1, 135.3, 135.1, 132.9, 128.5, 128.4, 128.1, 128.0, 126.8, 125.9, 45.3, 45.0, 43.5, 42.3, 40.6, 38.9, 35.8, 34.7, 33.3, 32.9, 31.9, 31.7$  ppm.

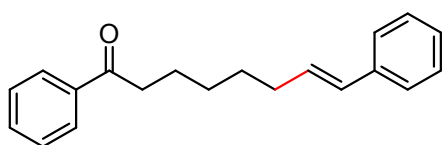

**1,8-Diphenyloct-7-en-1-one (4l):** (known compound)<sup>b</sup>, White solid; (44%, 24.5 mg);  $E/Z > 99:1$ ;  $R_f = 0.44$  (EtOAc/petroleum ether = 1:20);  $^1\text{H}$  NMR (600 MHz,  $\text{CDCl}_3$ )  $\delta$  7.98 – 7.93 (m, 2H), 7.55 (t,  $J = 7.2$  Hz, 1H), 7.48 – 7.44 (m, 2H), 7.34 (d,  $J = 7.8$  Hz, 2H), 7.29 (t,  $J = 7.2$  Hz, 2H), 7.19 (t,  $J = 7.2$  Hz, 1H), 6.38 (d,  $J = 15.6$  Hz, 1H), 6.22 (dt,  $J = 15.6, 7.2$  Hz, 1H), 2.98 (t,  $J = 7.2$  Hz, 2H), 2.26 – 2.21 (m, 2H), 1.81 – 1.76 (m, 2H), 1.56 – 1.51 (m, 2H), 1.48 – 1.43 (m, 2H);  $^{13}\text{C}$  NMR (150 MHz,  $\text{CDCl}_3$ )  $\delta = 200.46, 137.82, 137.03, 132.89, 130.81, 129.92, 128.55, 128.45, 128.04, 126.79, 125.90, 38.54, 32.84, 29.18, 28.89, 24.17$  ppm.

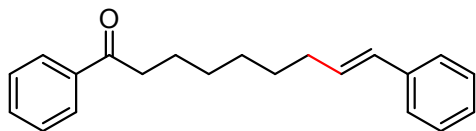

**1,9-Diphenylnon-8-en-1-one (4m):** (known compound)<sup>b</sup>, Colorless oil; (80%, 46.8 mg); *E/Z* > 99:1;  $R_f = 0.43$  (EtOAc/petroleum ether = 1:20);  $^1\text{H NMR}$  (600 MHz,  $\text{CDCl}_3$ )  $\delta$  7.98 – 7.94 (m, 2H), 7.57 – 7.54 (m, 1H), 7.48 – 7.45 (m, 2H), 7.35 (d,  $J = 7.2$  Hz, 2H), 7.29 (t,  $J = 7.2$  Hz, 2H), 7.19 (t,  $J = 7.2$  Hz, 1H), 6.38 (d,  $J = 16.2$  Hz, 1H), 6.23 (dt,  $J = 16.2, 6.6$  Hz, 1H), 2.98 (t,  $J = 7.8$  Hz, 2H), 2.24 – 2.20 (m, 2H), 1.79 – 1.73 (m, 2H), 1.53 – 1.46 (m, 2H), 1.45 – 1.38 (m, 4H);  $^{13}\text{C NMR}$  (150 MHz,  $\text{CDCl}_3$ )  $\delta = 200.49, 137.85, 137.04, 132.84, 130.97, 129.79, 128.52, 128.43, 128.01, 126.73, 125.87, 38.54, 32.92, 29.17, 29.15, 28.98, 24.24$  ppm.

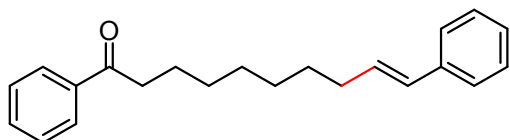

**1,10-Diphenyldec-9-en-1-one (4n):** (known compound)<sup>b</sup>, White solid; (70%, 42.9 mg); *E/Z* > 99:1;  $R_f = 0.49$  (EtOAc/petroleum ether = 1:20);  $^1\text{H NMR}$  (400 MHz,  $\text{CDCl}_3$ )  $\delta$  7.97 – 7.95 (m, 2H), 7.57 – 7.53 (m, 1H), 7.48 – 7.44 (m, 2H), 7.35 – 7.27 (m, 4H), 7.21 – 7.17 (m, 1H), 6.38 (d,  $J = 16.0$  Hz, 1H), 6.22 (dt,  $J = 16.0, 6.8$  Hz, 1H), 2.99 – 2.95 (m, 2H), 2.23 – 2.18 (m, 2H), 1.77 – 1.71 (m, 2H), 1.49 – 1.44 (m, 2H), 1.38 – 1.37 (m, 6H);  $^{13}\text{C NMR}$  (100 MHz,  $\text{CDCl}_3$ )  $\delta = 200.6, 137.9, 137.0, 132.9, 131.1, 129.7, 128.5, 128.4, 128.0, 126.7, 125.9, 38.6, 33.0, 29.3, 29.0, 24.3$  ppm.

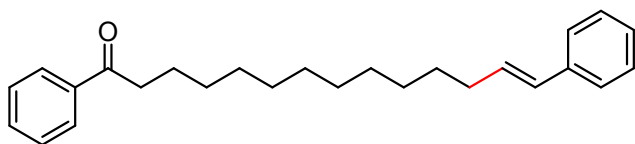

**1,14-Diphenyltetradec-13-en-1-one (4o):** White solid; (77%, 55.8 mg); mp: 73 – 75 °C; *E/Z* > 99:1;  $R_f = 0.50$  (EtOAc/petroleum ether = 1:25);  $^1\text{H NMR}$  (400 MHz,  $\text{CDCl}_3$ )  $\delta$  7.97 (d,  $J = 7.2$  Hz, 2H), 7.56 (t,  $J = 7.2$  Hz, 1H), 7.46 (t,  $J = 7.6$  Hz, 2H), 7.35 (d,  $J = 7.6$  Hz, 2H), 7.31 – 7.27 (m, 2H), 7.19 (t,  $J = 7.6$  Hz, 1H), 6.38 (d,  $J = 15.6$  Hz, 1H), 6.23 (dt,  $J = 16.0, 6.8$  Hz, 1H), 2.96 (t,  $J = 7.2$  Hz, 2H), 2.23 – 2.17 (m, 2H), 1.78 – 1.70 (m, 2H), 1.48 – 1.43 (m, 2H), 1.37 – 1.26 (m, 14H);  $^{13}\text{C NMR}$  (100 MHz,  $\text{CDCl}_3$ )  $\delta = 200.6, 137.9, 137.0, 132.8, 131.2, 129.6, 128.5, 128.4, 128.0, 126.7, 125.9, 38.6,$

33.0, 29.6, 29.5, 29.4, 29.2, 24.3 ppm; IR (neat):  $\nu_{\max}$  2921, 2851, 1684, 1456, 736, 690  $\text{cm}^{-1}$ ; HRMS (ESI) calcd for  $\text{C}_{26}\text{H}_{34}\text{NaO}$   $[\text{M}+\text{Na}]^+$  385.2502, found 385.2497.

### Characterization of Products 5

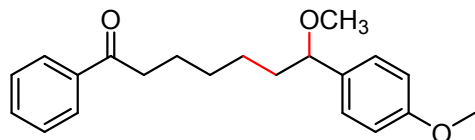

**7-Methoxy-7-(4-methoxyphenyl)-1-phenylheptan-1-one (5a):** Colorless oil; (86%, 56.2 mg);  $R_f = 0.25$  (EtOAc/petroleum ether = 1:25);  $^1\text{H}$  NMR (400 MHz,  $\text{CDCl}_3$ )  $\delta$  7.97 – 7.91 (m, 2H), 7.58 – 7.50 (m, 1H), 7.45 (t,  $J = 8.0$  Hz, 2H), 7.19 (d,  $J = 8.4$  Hz, 2H), 6.90 – 6.86 (m, 2H), 4.03 (t,  $J = 6.8$  Hz, 1H), 3.80 (s, 3H), 3.17 (s, 3H), 2.93 (t,  $J = 7.2$  Hz, 2H), 1.84 – 1.59 (m, 4H), 1.45 – 1.23 (m, 4H);  $^{13}\text{C}$  NMR (100 MHz,  $\text{CDCl}_3$ )  $\delta = 200.4, 159.0, 137.0, 134.3, 132.8, 128.5, 128.0, 127.8, 113.7, 83.5, 56.3, 55.2, 38.5, 37.9, 29.2, 25.6, 24.2$  ppm; IR (neat):  $\nu_{\max}$  2934, 2856, 1684, 1607, 1510, 1454, 831, 748, 694  $\text{cm}^{-1}$ ; HRMS (ESI) calcd for  $\text{C}_{21}\text{H}_{26}\text{NaO}_3$   $[\text{M}+\text{Na}]^+$  349.1774, found 349.1775.

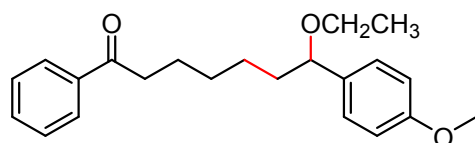

**7-Ethoxy-7-(4-methoxyphenyl)-1-phenylheptan-1-one (5b):** Colorless oil; (81%, 55.1 mg);  $R_f = 0.28$  (EtOAc/petroleum ether = 1:25);  $^1\text{H}$  NMR (400 MHz,  $\text{CDCl}_3$ )  $\delta$  7.96 – 7.91 (m, 2H), 7.57 – 7.52 (m, 1H), 7.45 (t,  $J = 7.6$  Hz, 2H), 7.22 – 7.18 (m, 2H), 6.89 – 6.85 (m, 2H), 4.13 (t,  $J = 6.8$  Hz, 1H), 3.80 (s, 3H), 3.39 – 3.30 (m, 1H), 3.30 – 3.29 (m, 1H), 2.93 (t,  $J = 7.6$  Hz, 2H), 1.83 – 1.59 (m, 4H), 1.47 – 1.33 (m, 3H), 1.31 – 1.22 (m, 1H), 1.15 (t,  $J = 6.8$  Hz, 3H);  $^{13}\text{C}$  NMR (100 MHz,  $\text{CDCl}_3$ )  $\delta = 200.4, 158.8, 137.0, 135.1, 132.8, 128.5, 128.0, 127.7, 113.6, 81.6, 63.7, 55.2, 38.5, 38.1, 29.2, 25.7, 24.2, 15.3$  ppm; IR (neat):  $\nu_{\max}$  2934, 2861, 1684, 1607, 1510, 1453, 830, 751, 693  $\text{cm}^{-1}$ ; HRMS (ESI) calcd for  $\text{C}_{22}\text{H}_{28}\text{NaO}_3$   $[\text{M}+\text{Na}]^+$  363.1931, found 363.1930.

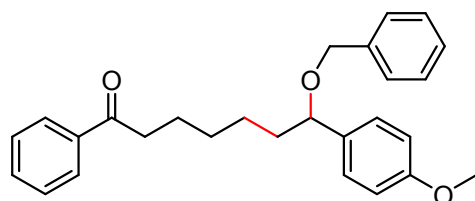

**7-(Benzyloxy)-7-(4-methoxyphenyl)-1-phenylheptan-1-one (5c):** Yellow oil; (93%,

74.8 mg);  $R_f = 0.40$  (EtOAc/petroleum ether = 1:15);  $^1\text{H NMR}$  (400 MHz,  $\text{CDCl}_3$ )  $\delta$  7.94 (d,  $J = 7.2$  Hz, 2H), 7.55 (t,  $J = 7.2$  Hz, 1H), 7.45 (t,  $J = 8.0$  Hz, 2H), 7.35 – 7.28 (m, 5H), 7.26 – 7.24 (s, 2H), 6.91 (d,  $J = 8.4$  Hz, 2H), 4.43 (d,  $J = 12.0$  Hz, 1H), 4.27 – 4.20 (m, 2H), 3.83 (s, 3H), 2.92 (t,  $J = 7.2$  Hz, 2H), 1.94 – 1.82 (m, 1H), 1.76 – 1.64 (m, 3H), 1.51 – 1.44 (m, 1H), 1.40 – 1.28 (m, 3H);  $^{13}\text{C NMR}$  (100 MHz,  $\text{CDCl}_3$ )  $\delta = 200.4, 159.0, 138.7, 136.9, 134.5, 132.8, 128.5, 128.3, 128.0, 127.9, 127.8, 127.4, 113.7, 80.8, 70.1, 55.2, 38.5, 38.1, 29.1, 25.7, 24.2$  ppm; IR (neat):  $\nu_{\text{max}}$  2933, 2857, 1683, 1608, 1509, 1453, 804, 746, 695  $\text{cm}^{-1}$ ; HRMS (ESI) calcd for  $\text{C}_{27}\text{H}_{30}\text{NaO}_3$   $[\text{M}+\text{Na}]^+$  425.2087, found 425.2090.

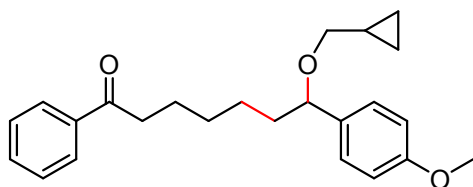

**7-(Cyclopropylmethoxy)-7-(4-methoxyphenyl)-1-phenylheptan-1-one (5d):**

Yellow oil; (86%, 62.9 mg);  $R_f = 0.35$  (EtOAc/petroleum ether = 1:25);  $^1\text{H NMR}$  (400 MHz,  $\text{CDCl}_3$ )  $\delta$  8.00 – 7.86 (m, 2H), 7.58 – 7.50 (m, 1H), 7.45 (t,  $J = 7.6$  Hz, 2H), 7.21 – 7.18 (m, 2H), 6.88 – 6.84 (m, 2H), 4.16 (t,  $J = 6.8$  Hz, 1H), 3.80 (s, 3H), 3.11 (dd,  $J = 10.0, 6.8$  Hz, 1H), 3.04 (dd,  $J = 10.0, 6.8$  Hz, 1H), 2.93 (t,  $J = 7.2$  Hz, 2H), 1.91 – 1.77 (m, 1H), 1.75 – 1.67 (m, 2H), 1.64 – 1.56 (m, 1H), 1.50 – 1.34 (m, 3H), 1.32 – 1.25 (m, 1H), 1.07 – 0.96 (m, 1H), 0.53 – 0.42 (m, 2H), 0.15 – 0.07 (m, 2H);  $^{13}\text{C NMR}$  (100 MHz,  $\text{CDCl}_3$ )  $\delta = 200.5, 158.8, 137.0, 135.0, 132.8, 128.5, 128.0, 127.7, 113.6, 81.4, 73.2, 55.2, 38.5, 38.3, 29.2, 25.8, 24.2, 10.7, 3.1, 2.9$  ppm; IR (neat):  $\nu_{\text{max}}$  3072, 2005, 2935, 1685, 1607, 1510, 1455, 830, 750, 693  $\text{cm}^{-1}$ ; HRMS (ESI) calcd for  $\text{C}_{24}\text{H}_{30}\text{NaO}_3$   $[\text{M}+\text{Na}]^+$  389.2087, found 389.2082.

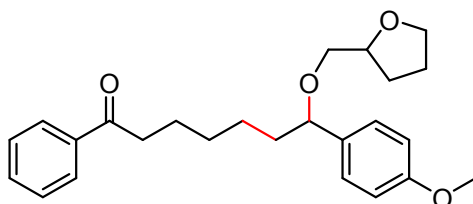

**7-(4-Methoxyphenyl)-1-phenyl-7-((tetrahydrofuran-2-yl)methoxy)heptan-1-one**

**(5e):** Faint yellow oil; (78%, 61.8 mg);  $dr = 1:1$ ;  $R_f = 0.32$  (EtOAc/petroleum ether =

1:25);  $^1\text{H}$  NMR (400 MHz,  $\text{CDCl}_3$ )  $\delta$  7.97 – 7.90 (m, 2H), 7.55 (t,  $J = 7.2$  Hz, 1H), 7.45 (t,  $J = 7.6$  Hz, 2H), 7.20 (d,  $J = 7.2$  Hz, 2H), 6.86 (d,  $J = 8.4$  Hz, 2H), 4.20 – 4.15 (m, 1H), 4.05 – 3.95 (m, 1H), 3.87 – 3.81 (m, 1H), 3.80 (s, 3H), 3.77 – 3.70 (m, 1H), 3.30 (dd,  $J = 10.0, 6.0$  Hz, 0.5H), 3.27 – 3.22 (m, 1H), 3.19 (dd,  $J = 10.0, 4.4$  Hz, 0.5H), 2.95 – 2.89 (m, 2H), 1.92 – 1.79 (m, 4H), 1.74 – 1.66 (m, 2H), 1.64 – 1.57 (m, 2H), 1.45 – 1.32 (m, 4H);  $^{13}\text{C}$  NMR (100 MHz,  $\text{CDCl}_3$ )  $\delta = 200.46, 158.89, 137.01, 134.74, 134.70, 132.83, 128.50, 128.01, 127.90, 127.81, 113.63, 82.34, 82.31, 78.10, 77.82, 71.27, 71.16, 68.26, 68.22, 55.20, 38.49, 38.09, 37.99, 29.17, 28.32, 28.13, 25.70, 25.61, 25.43, 24.20$  ppm; IR (neat):  $\nu_{\text{max}}$  3029, 2935, 2861, 1728, 1684, 1592, 1452, 756, 698  $\text{cm}^{-1}$ ; HRMS (ESI) calcd for  $\text{C}_{24}\text{H}_{32}\text{NaO}_4$   $[\text{M}+\text{Na}]^+$  419.2193, found 419.2197.

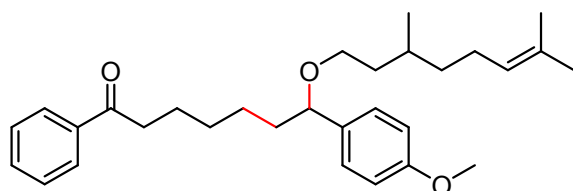

**7-((3,7-Dimethyloct-6-en-1-yl)oxy)-7-(4-methoxyphenyl)-1-phenylheptan-1-one**

**(5f):** Yellow oil; (78%, 70.3 mg); dr = 1:1;  $R_f = 0.33$  (EtOAc/petroleum ether = 1:25);  $^1\text{H}$  NMR (400 MHz,  $\text{CDCl}_3$ )  $\delta$  7.93 (d,  $J = 8.0$  Hz, 2H), 7.54 (t,  $J = 7.2$  Hz, 1H), 7.44 (t,  $J = 7.6$  Hz, 2H), 7.18 (d,  $J = 8.4$  Hz, 2H), 6.86 (d,  $J = 8.4$  Hz, 2H), 5.07 – 5.05 (m, 1H), 4.10 (t,  $J = 6.4$  Hz, 1H), 3.79 (s, 3H), 3.34 – 3.26 (m, 1H), 3.25 – 3.16 (m, 1H), 2.92 (t,  $J = 7.2$  Hz, 2H), 2.02 – 1.84 (m, 2H), 1.79 – 1.50 (m, 12H), 1.43 – 1.22 (m, 6H), 1.15 – 0.97 (m, 1H), 0.84 – 0.78 (m, 3H);  $^{13}\text{C}$  NMR (100 MHz,  $\text{CDCl}_3$ )  $\delta = 200.46, 158.77, 136.96, 135.19, 135.16, 132.84, 131.05, 130.99, 128.50, 128.00, 127.70, 127.66, 124.84, 124.83, 113.57, 81.84, 81.71, 66.80, 55.18, 38.48, 38.19, 37.17, 37.02, 36.89, 36.79, 29.50, 29.45, 29.17, 25.75, 25.71, 25.44, 25.40, 24.20, 19.51, 19.46, 17.60$  ppm; IR (neat):  $\nu_{\text{max}}$  2925, 2859, 1727, 1685, 1608, 1510, 1453, 805, 752, 693  $\text{cm}^{-1}$ ; HRMS (ESI) calcd for  $\text{C}_{30}\text{H}_{42}\text{NaO}_3$   $[\text{M}+\text{Na}]^+$  473.3036, found 473.3039.

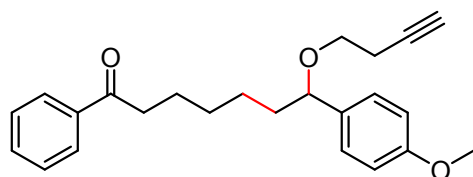

**7-(But-3-yn-1-yloxy)-7-(4-methoxyphenyl)-1-phenylheptan-1-one (5g):** Faint

yellow oil; (80%, 58.3 mg);  $R_f = 0.35$  (EtOAc/petroleum ether = 1:25);  $^1\text{H NMR}$  (400 MHz,  $\text{CDCl}_3$ )  $\delta$  7.98 – 7.89 (m, 2H), 7.59 – 7.51 (m, 1H), 7.47 – 7.43 (m, 2H), 7.22 – 7.19 (m, 2H), 6.91 – 6.81 (m, 2H), 4.24 – 4.11 (m, 1H), 3.80 (s, 3H), 3.46 – 3.39 (m, 1H), 3.38 – 3.31 (m, 1H), 2.93 (t,  $J = 7.2$  Hz, 2H), 2.48 – 2.32 (m, 2H), 1.94 (t,  $J = 2.8$  Hz, 1H), 1.87 – 1.77 (m, 1H), 1.76 – 1.66 (m, 2H), 1.65 – 1.60 (m, 1H), 1.52 – 1.42 (m, 1H), 1.43 – 1.29 (m, 3H);  $^{13}\text{C NMR}$  (100 MHz,  $\text{CDCl}_3$ )  $\delta = 200.5, 159.0, 137.0, 134.5, 132.9, 128.5, 128.0, 127.8, 113.7, 82.0, 81.5, 69.1, 66.5, 55.2, 38.5, 38.0, 29.1, 25.7, 24.2, 19.9$  ppm; IR (neat):  $\nu_{\text{max}}$  2934, 2861, 2237, 1684, 1607, 1511, 1454, 828, 751, 692  $\text{cm}^{-1}$ ; HRMS (ESI) calcd for  $\text{C}_{24}\text{H}_{28}\text{NaO}_3$   $[\text{M}+\text{Na}]^+$  387.1931, found 387.1928.

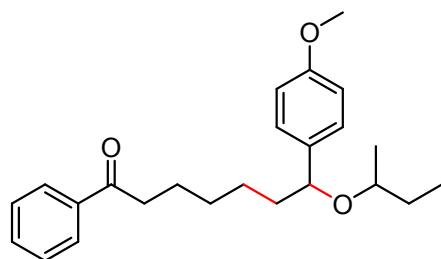

**7-(*sec*-Butoxy)-7-(4-methoxyphenyl)-1-phenylheptan-1-one (5h):** Yellow oil; (62%, 45.7 mg); dr = 1:1;  $R_f = 0.23$  (EtOAc/petroleum ether = 1:25);  $^1\text{H NMR}$  (400 MHz,  $\text{CDCl}_3$ )  $\delta$  7.94 (d,  $J = 7.6$  Hz, 2H), 7.55 (t,  $J = 7.2$  Hz, 1H), 7.45 (t,  $J = 7.6$  Hz, 2H), 7.23 – 7.19 (m, 2H), 6.86 (d,  $J = 8.1$  Hz, 2H), 4.24 (dd,  $J = 12.4, 5.6$  Hz, 1H), 3.80 (s, 3H), 3.31 – 3.23 (m, 0.5H), 3.22 – 3.13 (m, 0.5H), 2.93 (t,  $J = 7.2$  Hz, 2H), 1.82 – 1.66 (m, 3H), 1.61 – 1.51 (m, 2H), 1.50 – 1.27 (m, 5H), 1.09 (d,  $J = 6.0$  Hz, 1.5H), 0.97 (d,  $J = 6.0$  Hz, 1.5H), 0.88 (t,  $J = 7.6$  Hz, 1.5H), 0.76 (t,  $J = 7.6$  Hz, 1.5H);  $^{13}\text{C NMR}$  (100 MHz,  $\text{CDCl}_3$ )  $\delta = 200.5, 158.7, 137.0, 136.1, 132.8, 128.5, 128.0, 127.9, 127.7, 120.1, 113.5, 113.4, 104.9, 79.4, 78.3, 73.9, 73.0, 55.2, 38.6, 38.5, 30.3, 29.2, 28.1, 25.9, 24.2, 20.3, 18.6, 10.2, 9.3, 8.0$  ppm; IR (neat):  $\nu_{\text{max}}$  2932, 2866, 1684, 1611, 1455, 830, 752, 693  $\text{cm}^{-1}$ ; HRMS (ESI) calcd for  $\text{C}_{24}\text{H}_{32}\text{NaO}_3$   $[\text{M}+\text{Na}]^+$  391.2244, found 391.2239.

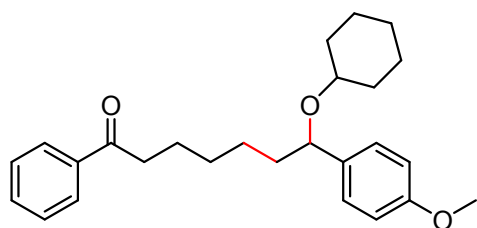

**7-(Cyclohexyloxy)-7-(4-methoxyphenyl)-1-phenylheptan-1-one (5i):** Faint yellow



oil; (50%, 39.5 mg);  $R_f = 0.30$  (EtOAc/petroleum ether = 1:15);  $^1\text{H NMR}$  (400 MHz,  $\text{CDCl}_3$ )  $\delta$  7.94 (d,  $J = 8.0$  Hz, 2H), 7.55 (t,  $J = 7.3$  Hz, 1H), 7.45 (t,  $J = 7.2$  Hz, 2H), 7.21 (d,  $J = 8.4$  Hz, 2H), 6.86 (d,  $J = 8.4$  Hz, 2H), 4.32 – 4.28 (m, 1H), 3.80 (s, 3H), 3.15 – 3.05 (m, 1H), 2.93 (t,  $J = 7.2$  Hz, 2H), 1.75 – 1.67 (m, 6H), 1.43 – 1.34 (m, 2H), 1.30 – 1.25 (m, 7H), 1.15 – 1.09 (m, 3H);  $^{13}\text{C NMR}$  (100 MHz,  $\text{CDCl}_3$ )  $\delta = 200.5$ , 158.6, 136.2, 132.8, 128.5, 128.0, 127.6, 113.5, 78.2, 74.5, 55.2, 38.8, 38.5, 33.6, 31.5, 29.2, 26.0, 25.8, 24.4, 24.3, 24.1 ppm; IR (neat):  $\nu_{\text{max}}$  2929, 2857, 1685, 1610, 1510, 1454, 804, 752, 695  $\text{cm}^{-1}$ ; HRMS (ESI) calcd for  $\text{C}_{26}\text{H}_{34}\text{NaO}_3$   $[\text{M}+\text{Na}]^+$  417.2400, found 417.2401.

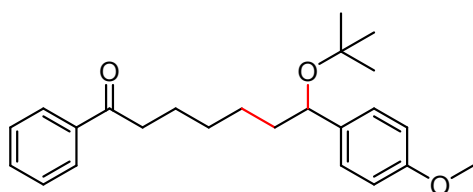

**7-(tert-Butoxy)-7-(4-methoxyphenyl)-1-phenylheptan-1-one (5j):** Yellow oil; (35%, 25.8 mg);  $R_f = 0.35$  (EtOAc/petroleum ether = 1:15);  $^1\text{H NMR}$  (400 MHz,  $\text{CDCl}_3$ )  $\delta$  7.94 (d,  $J = 7.6$  Hz, 2H), 7.55 (t,  $J = 7.2$  Hz, 1H), 7.45 (t,  $J = 7.6$  Hz, 2H), 7.21 (d,  $J = 8.5$  Hz, 2H), 6.83 (d,  $J = 8.4$  Hz, 2H), 4.38 – 4.34 (m, 1H), 3.79 (s, 3H), 2.93 (t,  $J = 7.2$  Hz, 2H), 1.75 – 1.66 (m, 2H), 1.56 – 1.43 (m, 2H), 1.41 – 1.34 (m, 2H), 1.28 – 1.25 (m, 2H), 1.10 (s, 9H);  $^{13}\text{C NMR}$  (100 MHz,  $\text{CDCl}_3$ )  $\delta = 200.5$ , 158.2, 139.1, 137.0, 132.8, 128.5, 128.0, 127.0, 113.4, 73.9, 73.8, 55.2, 40.3, 38.5, 29.3, 28.8, 26.1, 24.3 ppm; IR (neat):  $\nu_{\text{max}}$  2966, 1684, 1608, 1509, 1455, 815, 749, 694  $\text{cm}^{-1}$ ; HRMS (ESI) calcd for  $\text{C}_{24}\text{H}_{32}\text{NaO}_3$   $[\text{M}+\text{Na}]^+$  391.2244, found 391.2239.

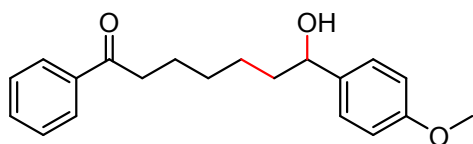

**7-Hydroxy-7-(4-methoxyphenyl)-1-phenylheptan-1-one (5k):** Yellow oil; (84%, 52.4 mg);  $R_f = 0.20$  (EtOAc/petroleum ether = 1:10);  $^1\text{H NMR}$  (400 MHz,  $\text{CDCl}_3$ )  $\delta$  7.97 – 7.90 (m, 2H), 7.58 – 7.51 (m, 1H), 7.45 (t,  $J = 8.0$  Hz, 2H), 7.27 – 7.23 (m, 2H), 6.89 – 6.84 (m, 2H), 4.61 (t,  $J = 6.4$  Hz, 1H), 3.79 (s, 3H), 2.94 (t,  $J = 7.6$  Hz, 2H), 1.94 (s, 1H), 1.85 – 1.77 (m, 1H), 1.74 – 1.70 (m, 2H), 1.51 – 1.20 (m, 5H);  $^{13}\text{C NMR}$  (100 MHz,  $\text{CDCl}_3$ )  $\delta = 200.4$ , 158.9, 136.9, 132.9, 128.5, 128.0, 127.1, 113.7, 74.1, 55.2,

38.7, 38.4, 29.1, 25.7, 24.1 ppm; IR (neat):  $\nu_{\max}$  2966, 1684, 1608, 1509, 1455, 815, 749, 694  $\text{cm}^{-1}$ ; HRMS (ESI) calcd for  $\text{C}_{20}\text{H}_{24}\text{NaO}_3$   $[\text{M}+\text{Na}]^+$  335.1618, found 335.1617.

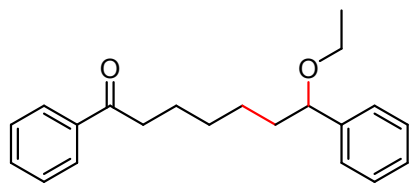

**7-Ethoxy-1,7-diphenylheptan-1-one (5l):** Colorless oil; (46%, 28.5 mg);  $R_f = 0.34$  (EtOAc/petroleum ether = 1:20);  $^1\text{H}$  NMR (400 MHz,  $\text{CDCl}_3$ )  $\delta$  8.00 – 7.88 (m, 2H), 7.55 (t,  $J = 7.2$  Hz, 1H), 7.45 (t,  $J = 7.6$  Hz, 2H), 7.36 – 7.26 (m, 5H), 4.19 (t,  $J = 6.0$  Hz, 1H), 3.41 – 3.33 (m, 1H), 3.32 – 3.25 (m, 1H), 2.93 (t,  $J = 7.2$  Hz, 2H), 1.86 – 1.76 (m, 1H), 1.76 – 1.67 (m, 2H), 1.67 – 1.60 (m, 1H), 1.52 – 1.44 (m, 1H), 1.43 – 1.34 (m, 2H), 1.33 – 1.26 (m, 1H), 1.17 (t,  $J = 6.8$  Hz, 3H);  $^{13}\text{C}$  NMR (100 MHz,  $\text{CDCl}_3$ )  $\delta = 200.5, 143.2, 137.6, 132.9, 128.5, 128.3, 128.0, 127.3, 126.5, 82.1, 64.1, 38.5, 38.2, 29.2, 25.7, 24.2, 15.3$  ppm; IR (neat):  $\nu_{\max}$  2966, 2929, 1684, 1523, 1458, 756, 696  $\text{cm}^{-1}$ ; HRMS (ESI) calcd for  $\text{C}_{21}\text{H}_{26}\text{NaO}_2$   $[\text{M}+\text{Na}]^+$  333.1825, found 333.1860.

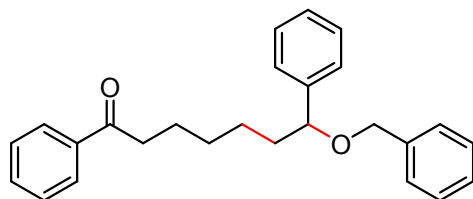

**7-(Benzyloxy)-1,7-diphenylheptan-1-one (5m):** Colorless oil; (48%, 35.7 mg);  $R_f = 0.33$  (EtOAc/petroleum ether = 1:20);  $^1\text{H}$  NMR (400 MHz,  $\text{CDCl}_3$ )  $\delta$  7.99 – 7.88 (m, 2H), 7.58 – 7.54 (m, 1H), 7.46 (t,  $J = 8.0$  Hz, 2H), 7.39 – 7.28 (m, 10H), 4.46 (d,  $J = 11.6$  Hz, 1H), 4.30 (dd,  $J = 7.6, 6.0$  Hz, 1H), 4.25 (d,  $J = 11.6$  Hz, 1H), 2.93 (t,  $J = 7.2$  Hz, 2H), 1.94 – 1.81 (m, 1H), 1.76 – 1.64 (m, 3H), 1.55 – 1.46 (m, 1H), 1.41 – 1.28 (m, 3H);  $^{13}\text{C}$  NMR (100 MHz,  $\text{CDCl}_3$ )  $\delta = 200.4, 142.6, 138.6, 137.0, 132.9, 128.5, 128.4, 128.3, 128.0, 127.8, 127.5, 127.4, 126.8, 81.3, 70.4, 38.5, 38.2, 29.1, 25.7, 24.2$  ppm; IR (neat):  $\nu_{\max}$  3030, 2934, 2859, 1684, 1592, 1494, 1452, 802, 746, 697  $\text{cm}^{-1}$ ; HRMS (ESI) calcd for  $\text{C}_{26}\text{H}_{28}\text{NaO}_2$   $[\text{M}+\text{Na}]^+$  395.1982, found 395.1979.

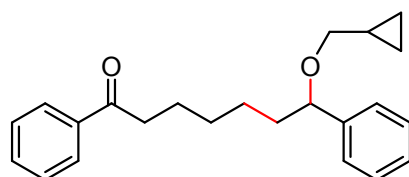

**7-(Cyclopropylmethoxy)-1,7-diphenylheptan-1-one (5n):** Yellow oil; (54%, 36.3 mg);  $R_f = 0.35$  (EtOAc/petroleum ether = 1:20);  $^1\text{H NMR}$  (400 MHz,  $\text{CDCl}_3$ )  $\delta$  7.98 – 7.90 (m, 2H), 7.55 (t,  $J = 7.2$  Hz, 1H), 7.45 (t,  $J = 7.6$  Hz, 2H), 7.35 – 7.30 (m, 2H), 7.29 – 7.26 (m, 3H), 4.21 (dd,  $J = 7.2, 5.6$  Hz, 1H), 3.14 (dd,  $J = 10.0, 6.4$  Hz, 1H), 3.07 (dd,  $J = 10.0, 6.4$  Hz, 1H), 2.94 (t,  $J = 7.2$  Hz, 2H), 1.90 – 1.79 (m, 1H), 1.76 – 1.67 (m, 2H), 1.66 – 1.60 (m, 1H), 1.56 – 1.44 (m, 1H), 1.42 – 1.35 (m, 2H), 1.34 – 1.26 (m, 1H), 1.09 – 0.98 (m, 1H), 0.54 – 0.43 (m, 2H), 0.15 – 0.08 (m, 2H);  $^{13}\text{C NMR}$  (100 MHz,  $\text{CDCl}_3$ )  $\delta = 200.5, 143.1, 137.0, 132.9, 128.5, 128.3, 128.0, 127.3, 126.5, 81.8, 73.5, 38.5, 38.3, 29.2, 25.8, 24.2, 10.7, 3.1, 2.9$  ppm; IR (neat):  $\nu_{\text{max}}$  3013, 2934, 2858, 1684, 1592, 1453, 1410, 802, 746, 697  $\text{cm}^{-1}$ ; HRMS (ESI) calcd for  $\text{C}_{23}\text{H}_{28}\text{NaO}_2$   $[\text{M}+\text{Na}]^+$  359.1982, found 359.1975.

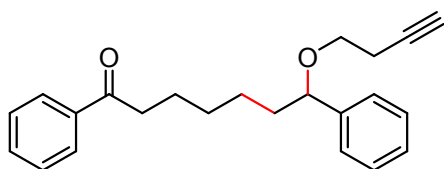

**7-(But-3-yn-1-yloxy)-1,7-diphenylheptan-1-one (5o):** Faint yellow oil; (50%, 33.4 mg);  $R_f = 0.30$  (EtOAc/petroleum ether = 1:20);  $^1\text{H NMR}$  (400 MHz,  $\text{CDCl}_3$ )  $\delta$  7.96 – 7.92 (m, 2H), 7.59 – 7.51 (m, 1H), 7.49 – 7.42 (m, 2H), 7.36 – 7.30 (m, 2H), 7.30 – 7.26 (m, 3H), 4.25 – 4.21 (m, 1H), 3.48 – 3.41 (m, 1H), 3.40 – 3.34 (m, 1H), 2.94 (t,  $J = 7.2$  Hz, 2H), 2.50 – 2.35 (m, 2H), 1.94 (t,  $J = 2.4$  Hz, 1H), 1.88 – 1.77 (m, 1H), 1.75 – 1.64 (m, 2H), 1.65 – 1.60 (m, 1H), 1.55 – 1.43 (m, 1H), 1.42 – 1.35 (m, 2H), 1.34 – 1.26 (m, 1H);  $^{13}\text{C NMR}$  (100 MHz,  $\text{CDCl}_3$ )  $\delta = 200.4, 142.5, 137.0, 132.9, 128.5, 128.3, 128.0, 127.5, 126.5, 82.4, 81.5, 69.1, 66.7, 38.5, 38.1, 29.1, 25.7, 24.2, 19.9$  ppm; IR (neat):  $\nu_{\text{max}}$  3013, 2959, 2245, 1682, 1591, 1450, 802, 694  $\text{cm}^{-1}$ ; HRMS (ESI) calcd for  $\text{C}_{23}\text{H}_{26}\text{NaO}_2$   $[\text{M}+\text{Na}]^+$  357.1825, found 357.1819.

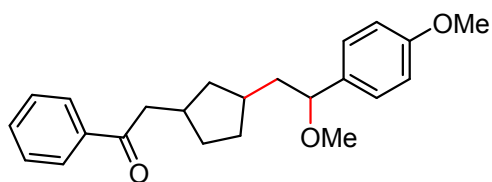

**2-(3-(2-Methoxy-2-(4-methoxyphenyl)ethyl)cyclopentyl)-1-phenylethan-1-one (5p):** Faint yellow oil; (81%, 56.9 mg); dr = 1:1;  $R_f = 0.33$  (EtOAc/petroleum ether =

1:20);  $^1\text{H}$  NMR (400 MHz,  $\text{CDCl}_3$ )  $\delta$  7.99 – 7.90 (m, 2H), 7.57 – 7.52 (m, 1H), 7.47 – 7.43 (m, 2H), 7.21 – 7.17 (m, 2H), 6.89 – 6.86 (m, 2H), 4.03 (t,  $J = 6.8$  Hz, 1H), 3.81 (s, 3H), 3.15 (s, 3H), 2.99 (d,  $J = 6.9$  Hz, 1H), 2.95 (d,  $J = 7.1$  Hz, 1H), 2.56 – 2.47 (m, 0.5H), 2.43 – 2.34 (m, 0.5H), 1.96 – 1.78 (m, 4H), 1.59 – 1.40 (m, 2H), 1.30 – 1.22 (m, 2H), 1.20 – 1.13 (m, 1H);  $^{13}\text{C}$  NMR (100 MHz,  $\text{CDCl}_3$ )  $\delta = 200.24, 159.01, 137.21, 134.45, 132.84, 128.52, 128.06, 127.91, 127.86, 113.71, 82.84, 82.78, 82.72, 56.29, 55.22, 45.27, 45.18, 44.85, 44.77, 40.53, 38.56, 38.48, 36.44, 35.85, 35.73, 35.19, 35.14, 34.65, 34.56, 33.01, 32.85, 32.77, 31.58, 31.45, 31.39$  ppm; IR (neat):  $\nu_{\text{max}}$  2931, 2856, 1683, 1463, 1447, 1209, 1034, 831, 694, 574  $\text{cm}^{-1}$ ; HRMS (ESI) calcd for  $\text{C}_{23}\text{H}_{28}\text{NaO}_3$   $[\text{M}+\text{Na}]^+$  375.1931, found 375.1924.

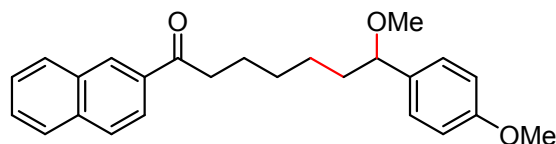

**7-Methoxy-7-(4-methoxyphenyl)-1-(naphthalen-2-yl)heptan-1-one (5q):** Faint yellow oil; (63%, 47.4 mg);  $R_f = 0.28$  (EtOAc/petroleum ether = 1:20);  $^1\text{H}$  NMR (400 MHz,  $\text{CDCl}_3$ )  $\delta$  8.45 (s, 1H), 8.03 – 8.00 (m, 1H), 7.96 (d,  $J = 7.9$  Hz, 1H), 7.90 – 7.86 (m, 2H), 7.64 – 7.51 (m, 2H), 7.21 – 7.18 (m, 2H), 6.89 – 6.86 (m, 2H), 4.04 (t,  $J = 6.8$  Hz, 1H), 3.80 (s, 3H), 3.18 (s, 3H), 3.07 (t,  $J = 7.6$  Hz, 2H), 1.80 – 1.73 (m, 2H), 1.71 – 1.54 (m, 2H), 1.42 – 1.38 (m, 2H), 1.35 – 1.22 (m, 2H);  $^{13}\text{C}$  NMR (100 MHz,  $\text{CDCl}_3$ )  $\delta = 200.4, 159.0, 135.5, 134.4, 134.3, 132.5, 129.6, 129.5, 128.4, 128.3, 127.8, 127.7, 126.7, 123.9, 83.5, 56.3, 55.2, 38.5, 37.9, 29.2, 25.7, 24.4$  ppm; IR (neat):  $\nu_{\text{max}}$  2931, 1670, 1610, 1510, 1244, 1173, 1086, 827, 748, 476  $\text{cm}^{-1}$ ; HRMS (ESI) calcd for  $\text{C}_{25}\text{H}_{28}\text{NaO}_3$   $[\text{M}+\text{Na}]^+$  399.1931, found 399.1918.

## References

- (1) (a) R. Sakamoto, S. Sakurai and K. Maruoka, *Chem.-Eur. J.*, **2017**, *23*, 9030; (b) R. Sakamoto, T. Kato, S. Sakurai and K. Maruoka, *Org. Lett.*, **2018**, *20*, 1400; (c) T. Seihara, S. Sakurai, T. Kato, R. Sakamoto and Maruoka, K. *Org. Lett.*, **2019**, *21*, 2477; (d) P. C. Too, Y. L. Tnay and S. Chiba, *Beilstein J. Org. Chem.*, 2013, **9**, 1217.
- (2) P. Gao, H. Wu, J.-C. Yang and L.-N. Guo, *Org. Lett.*, **2019**, *21*, 7104.

# <sup>1</sup>H NMR and <sup>13</sup>C NMR Spectra of the Products 3

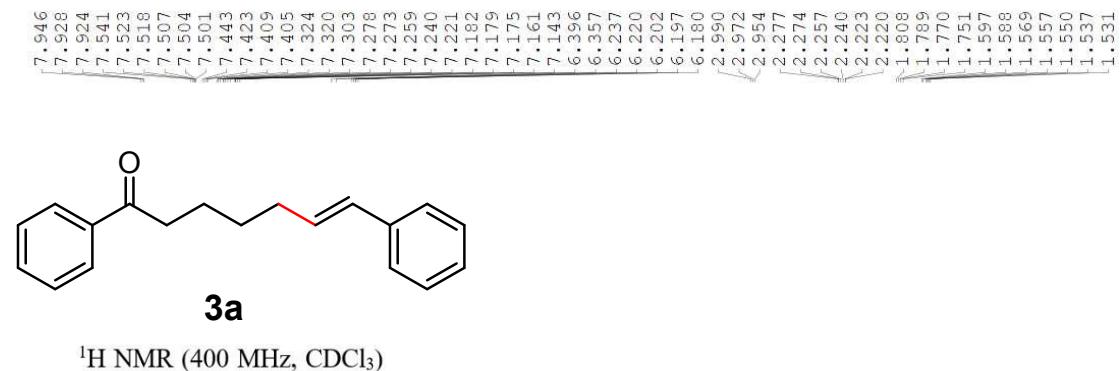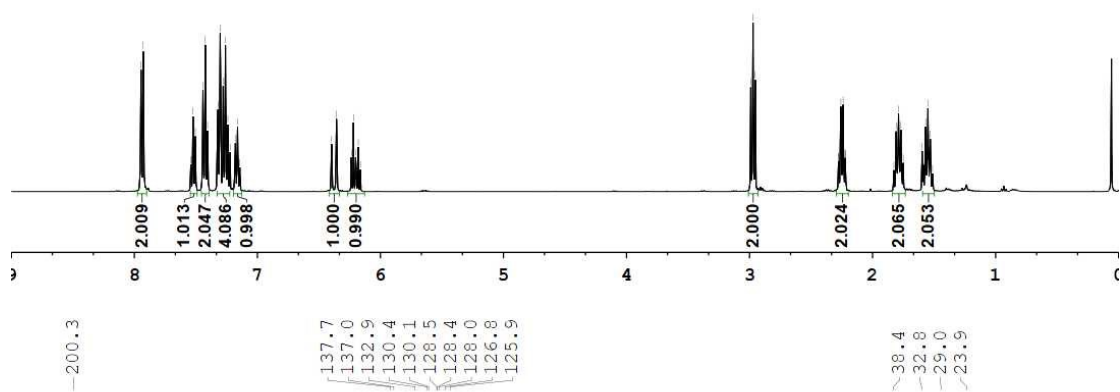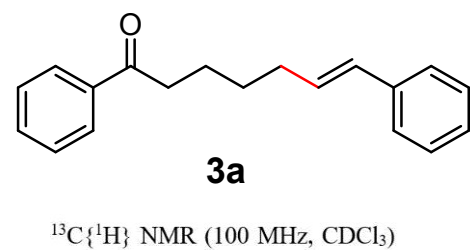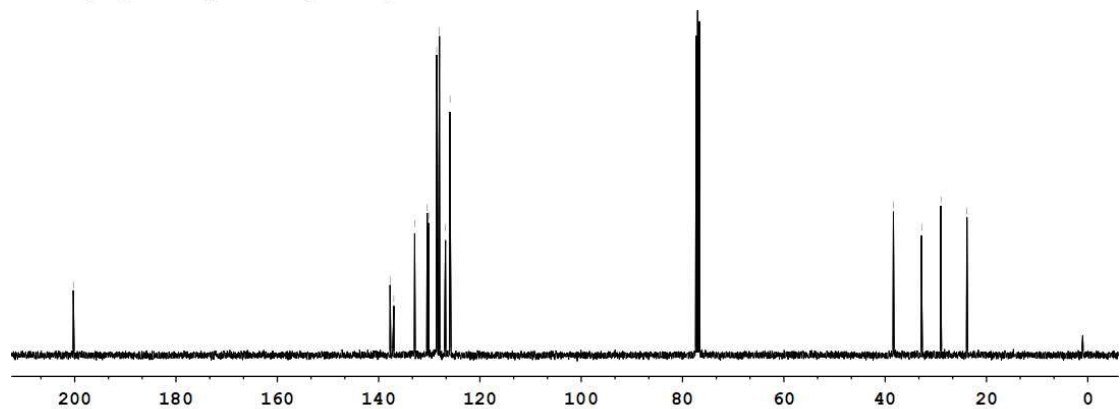

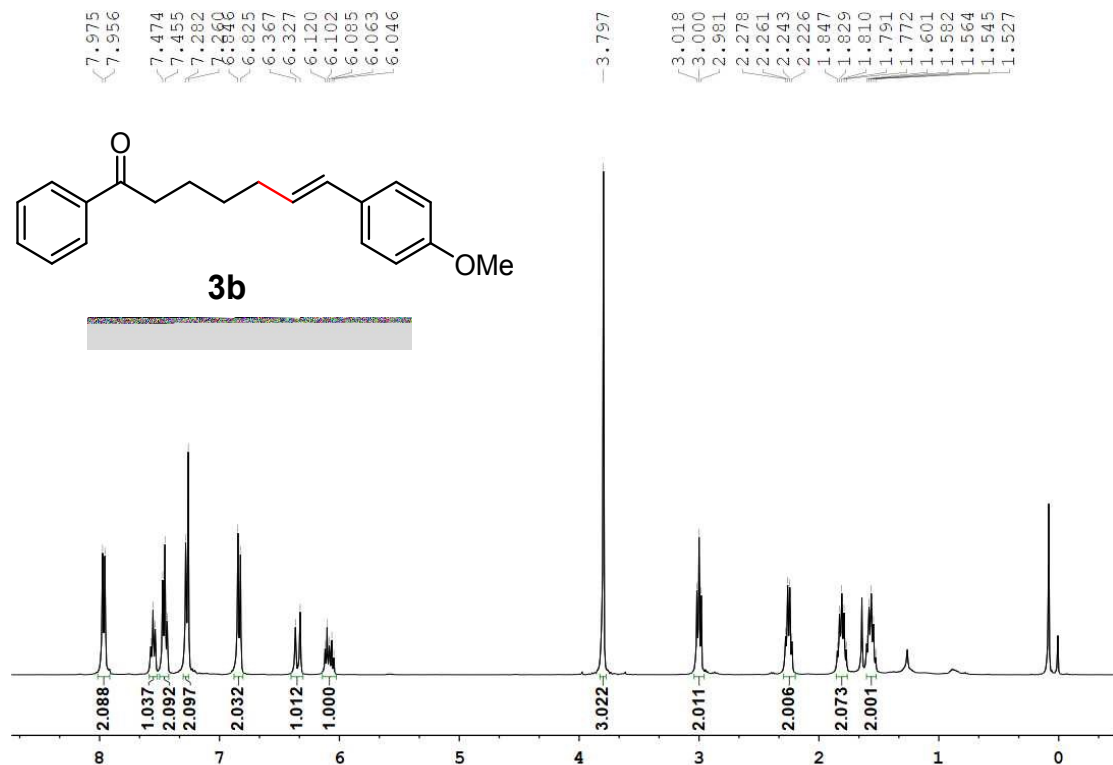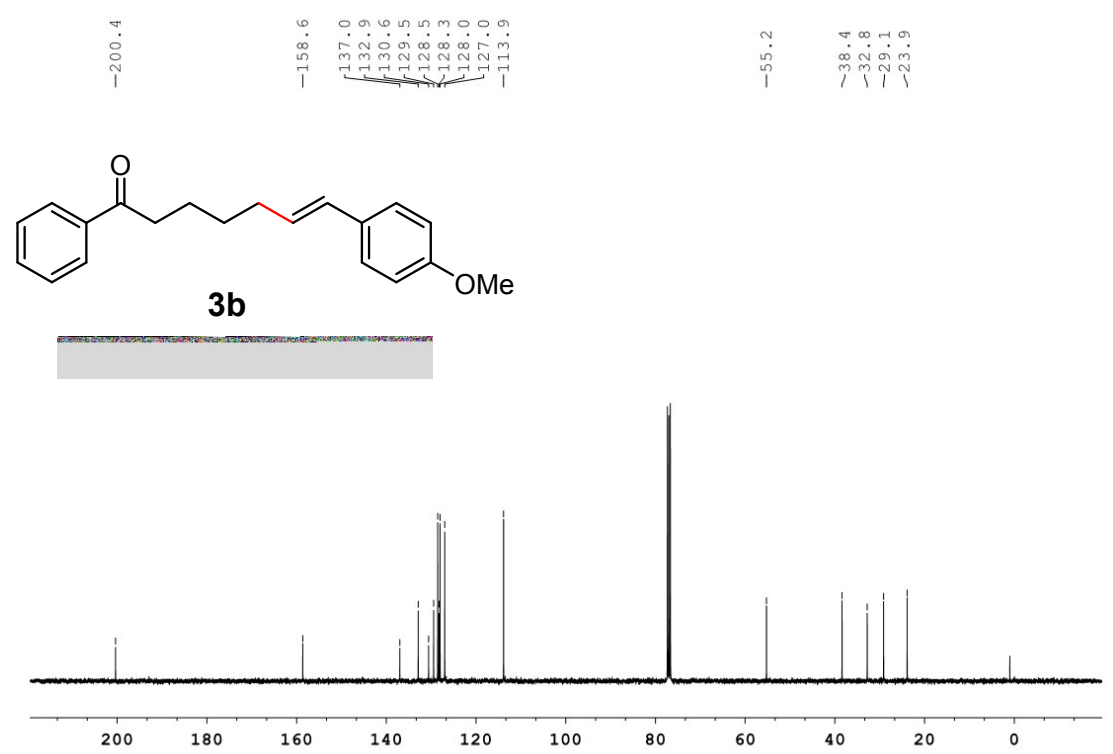

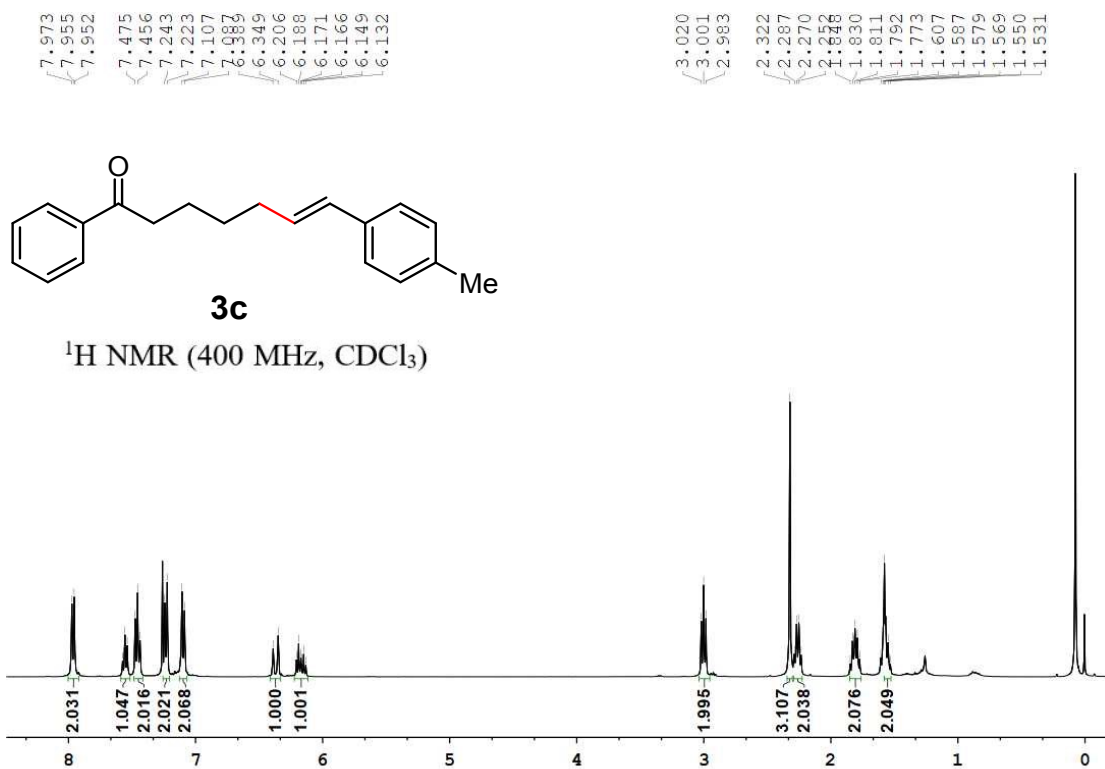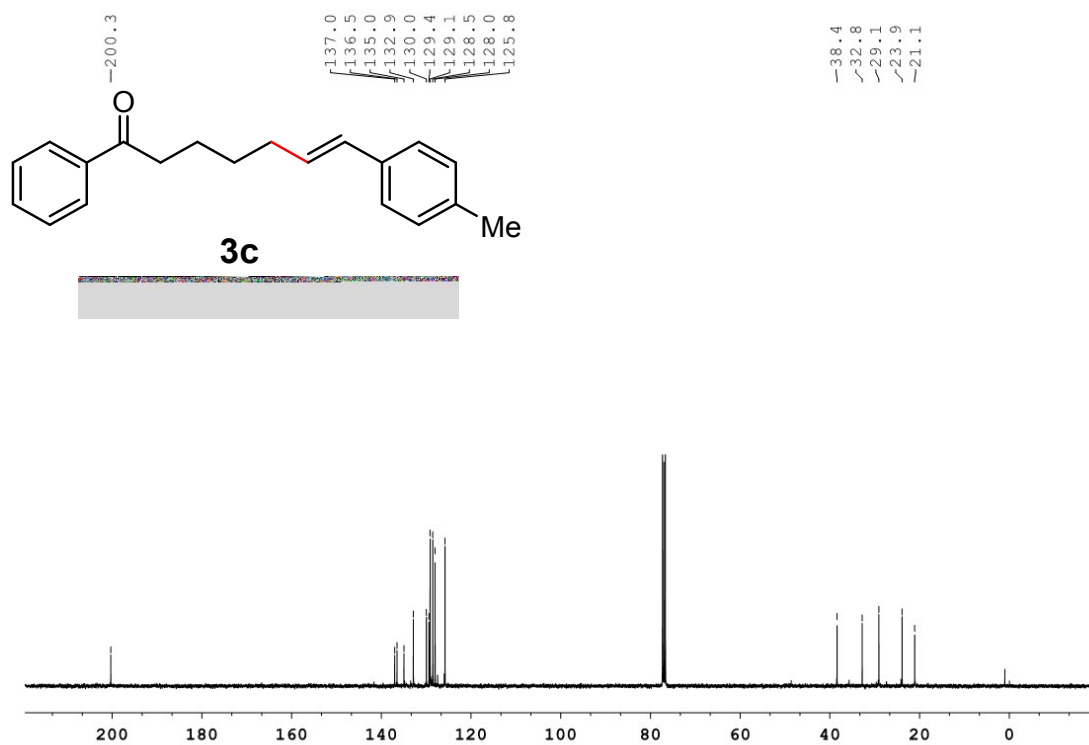



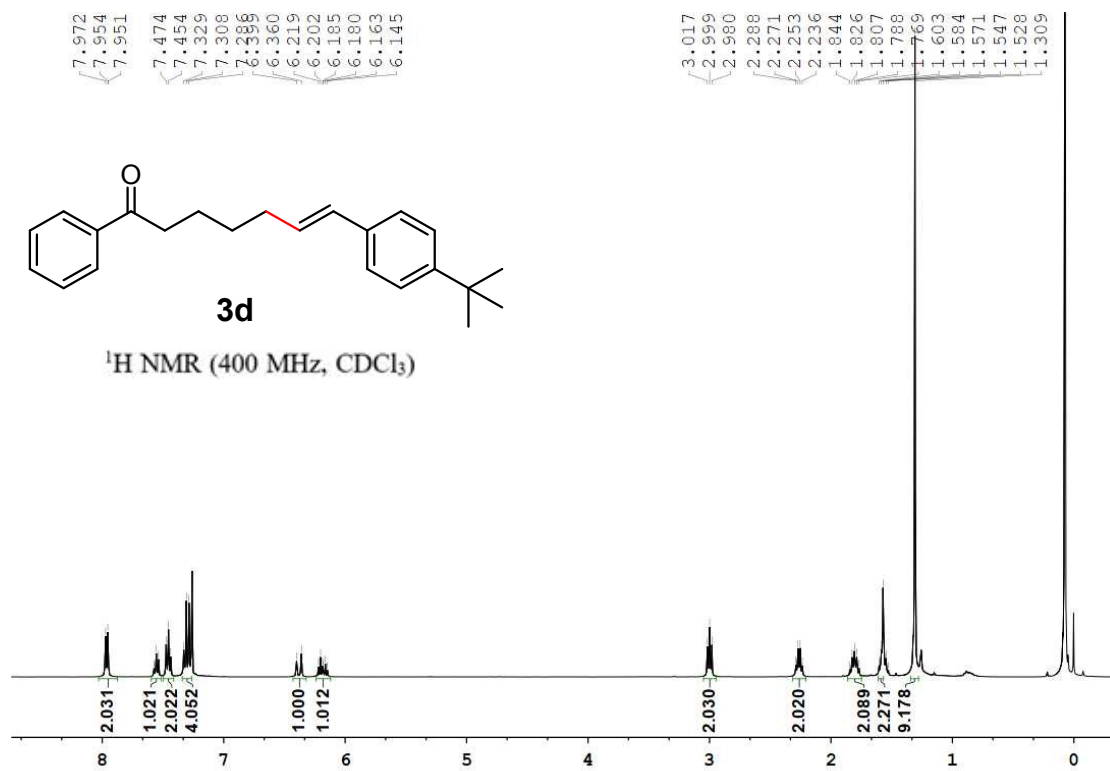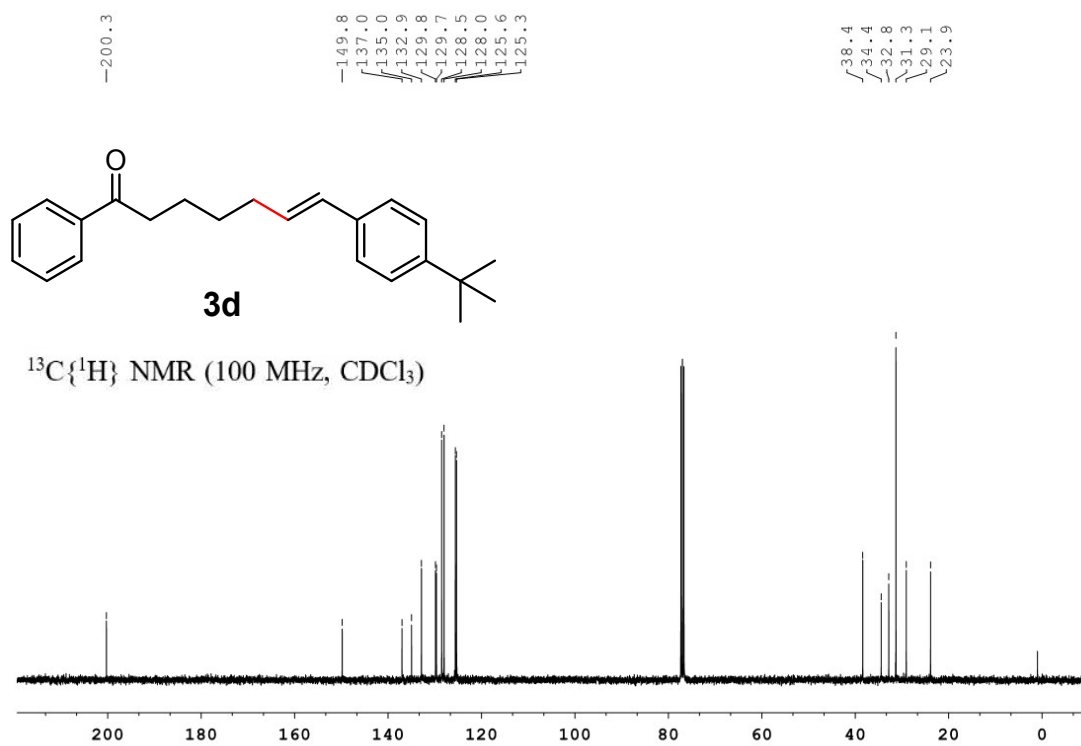

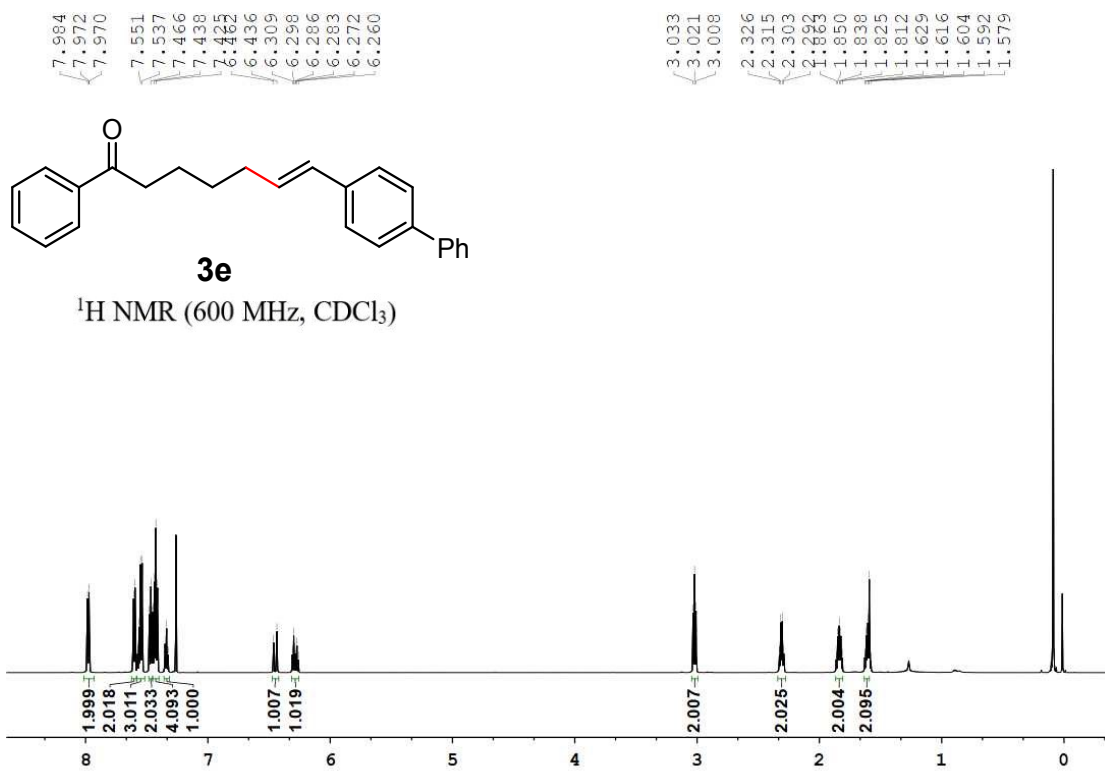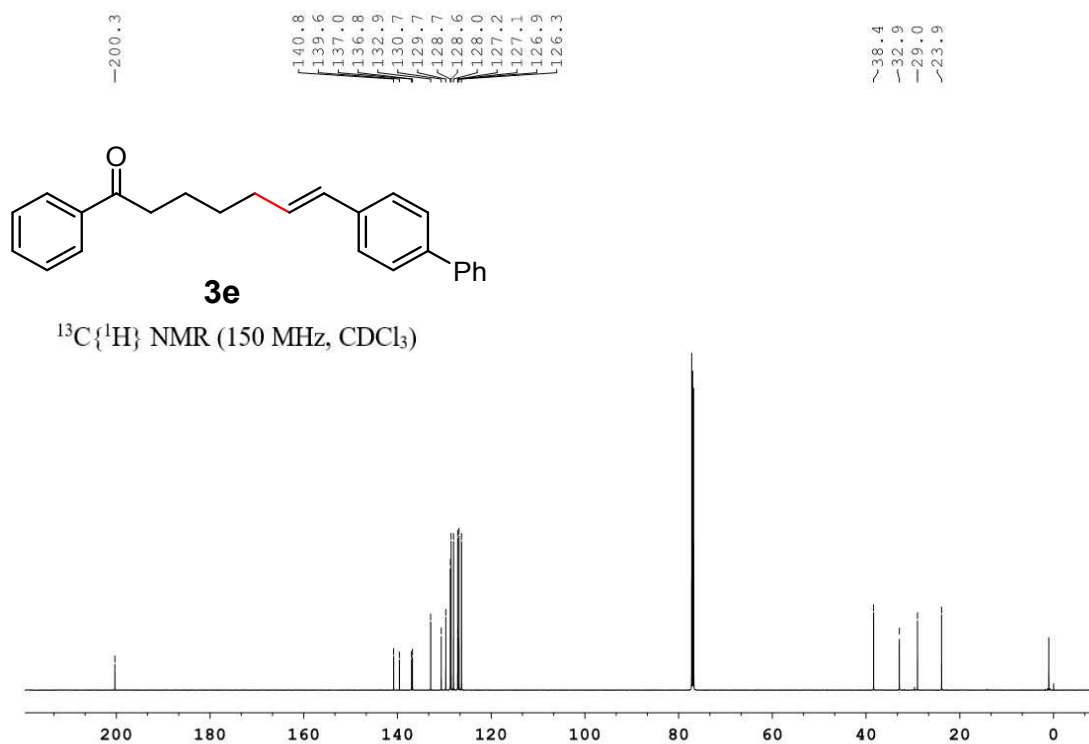

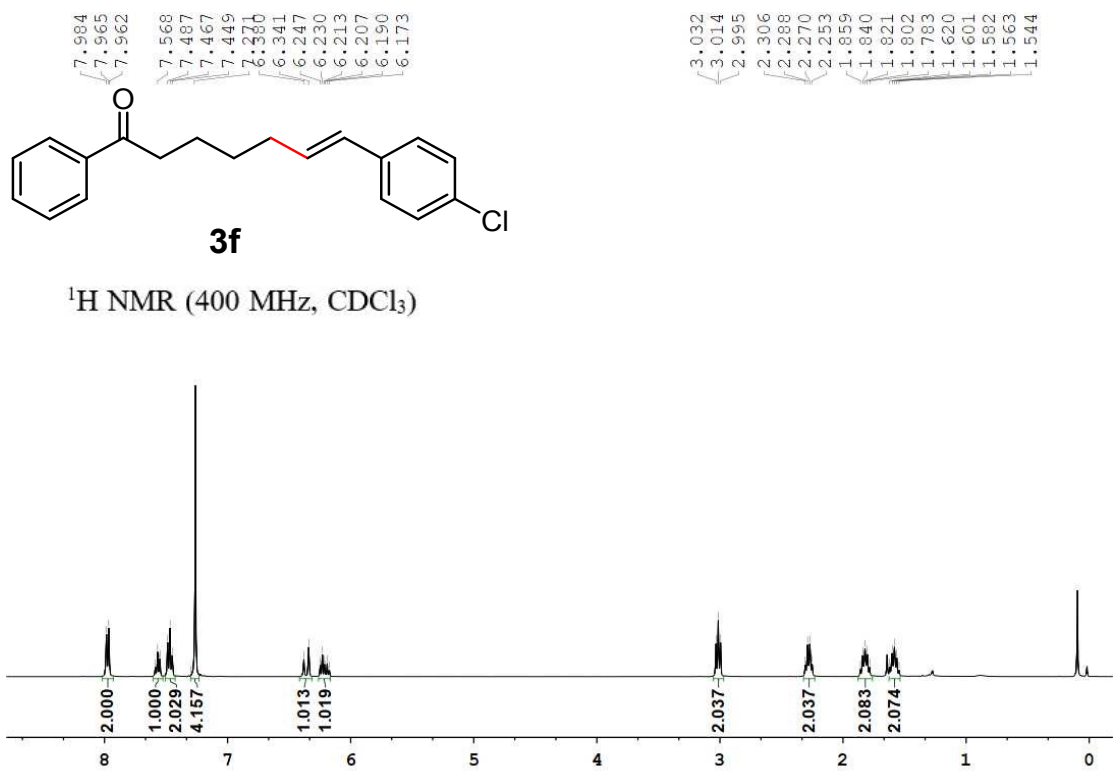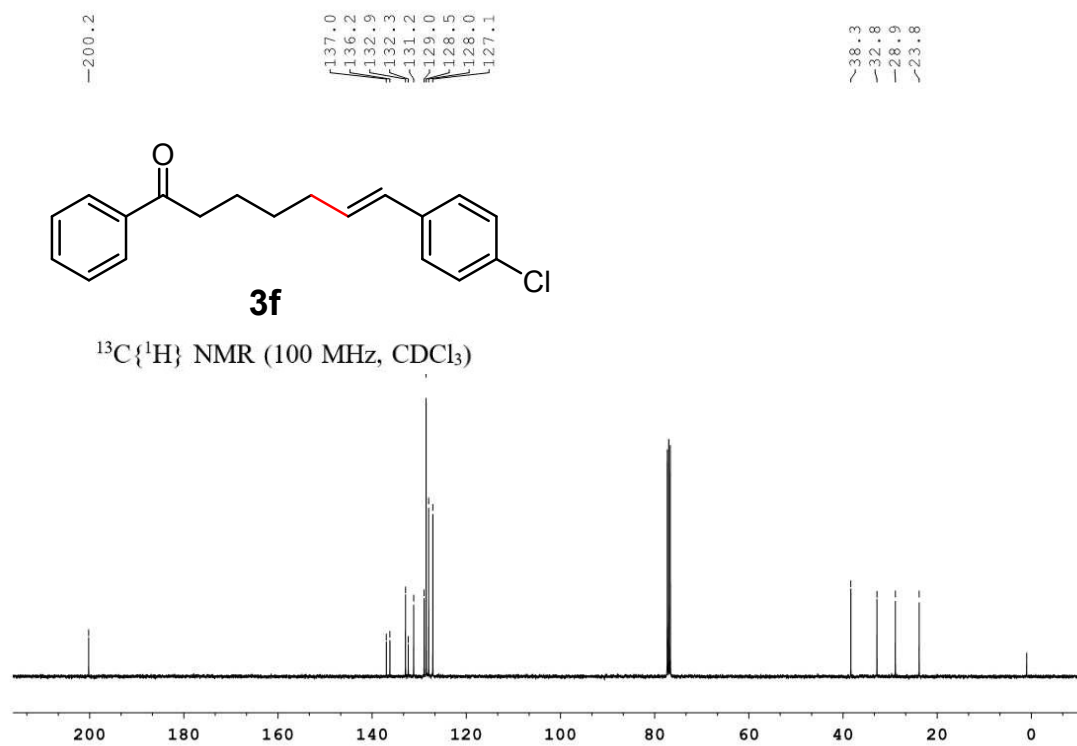

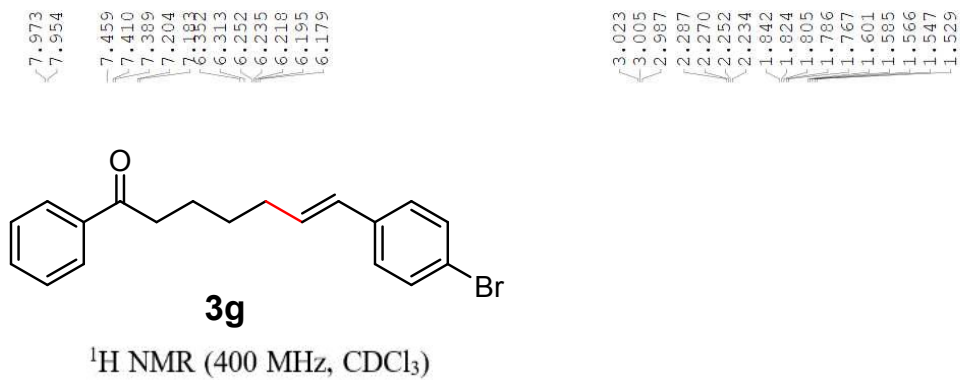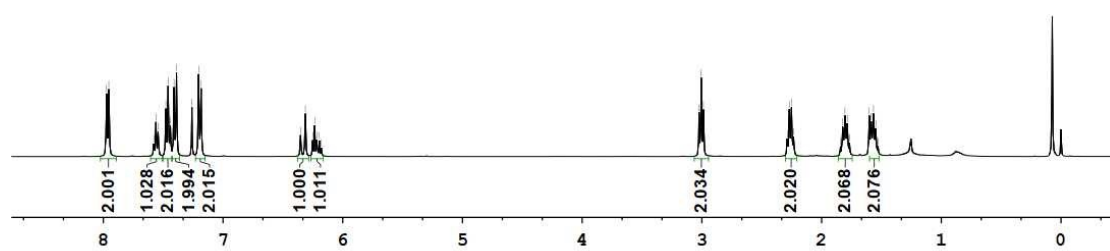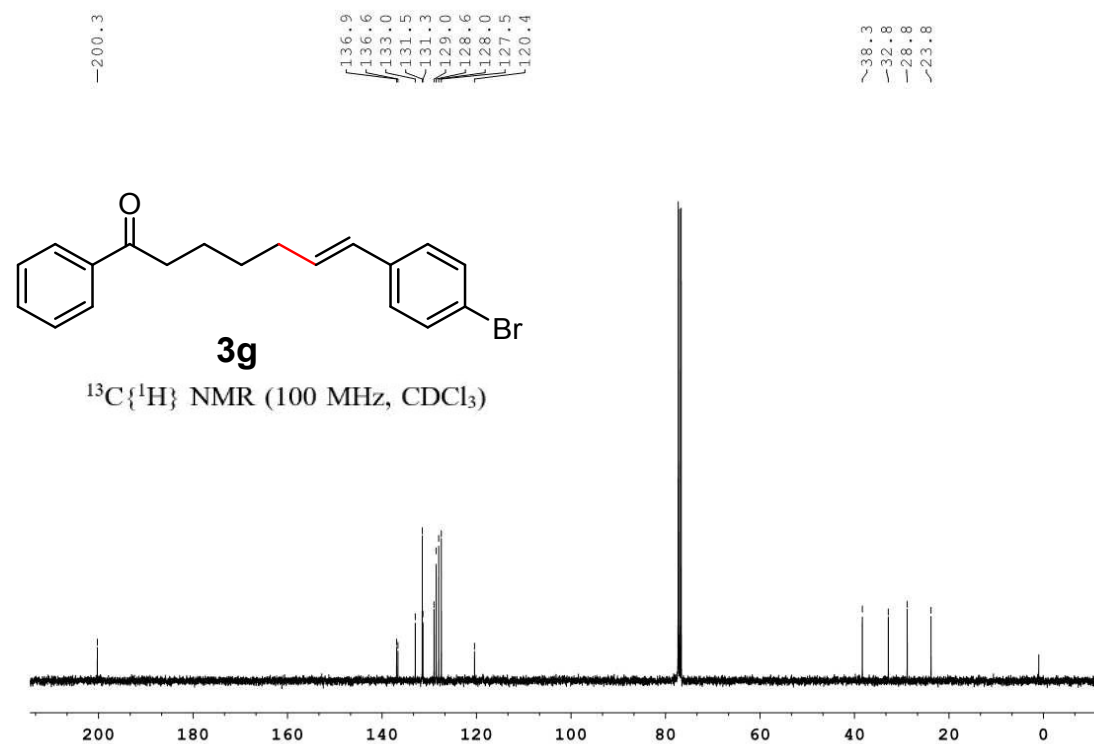

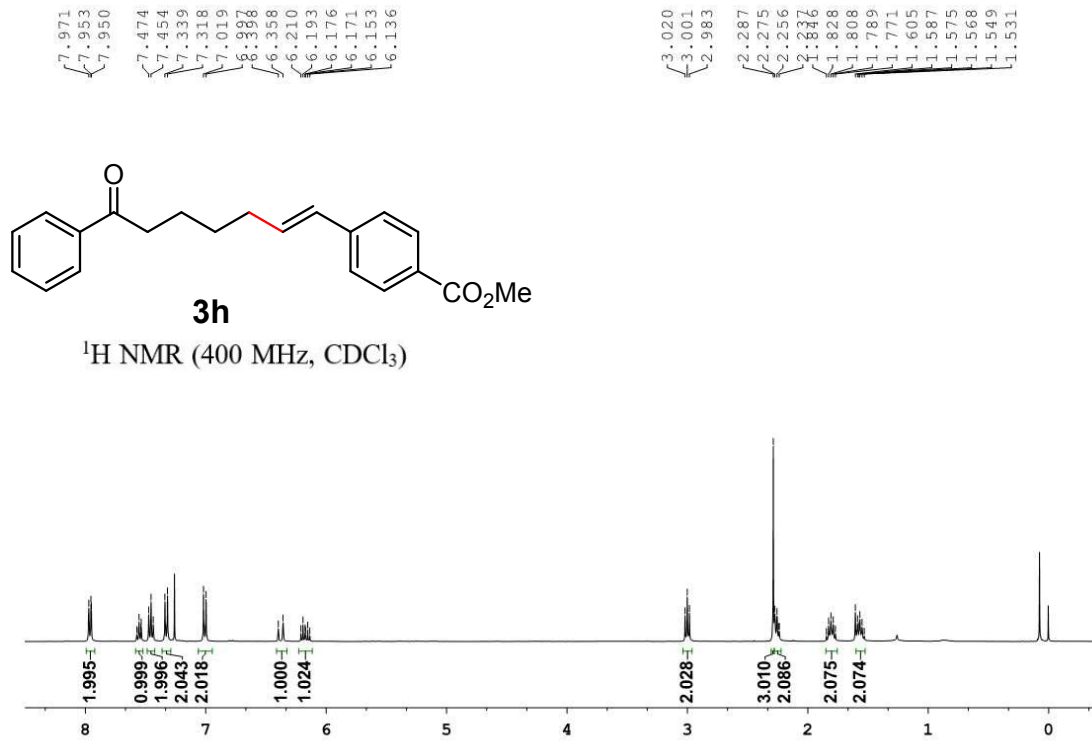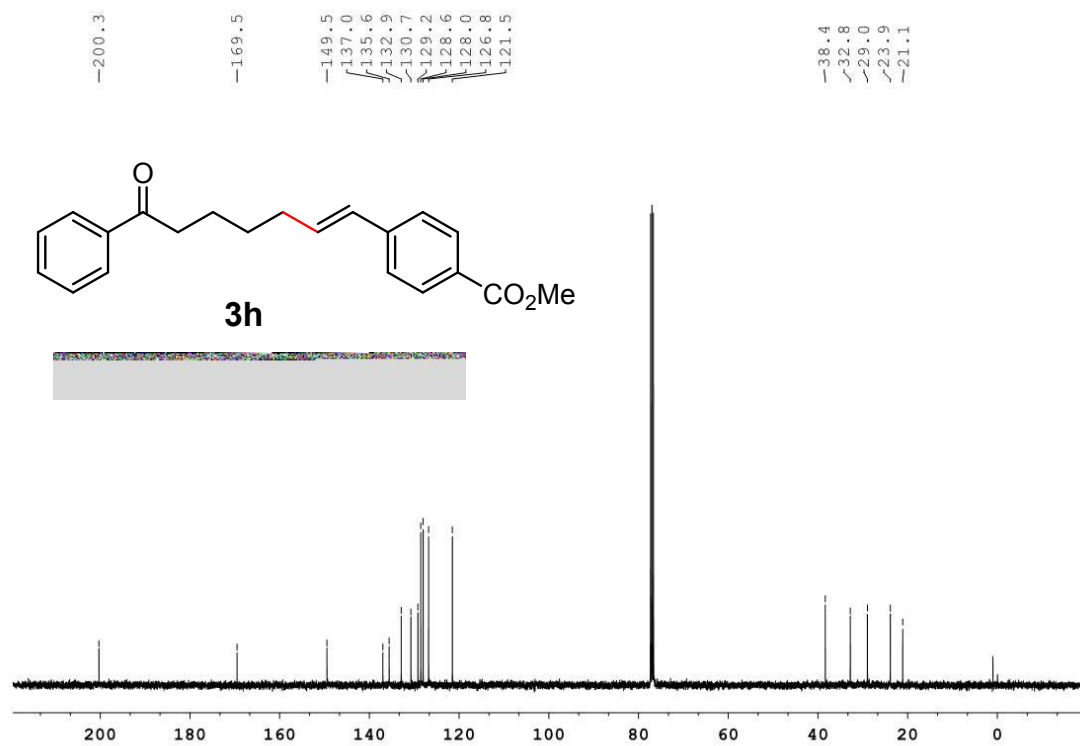

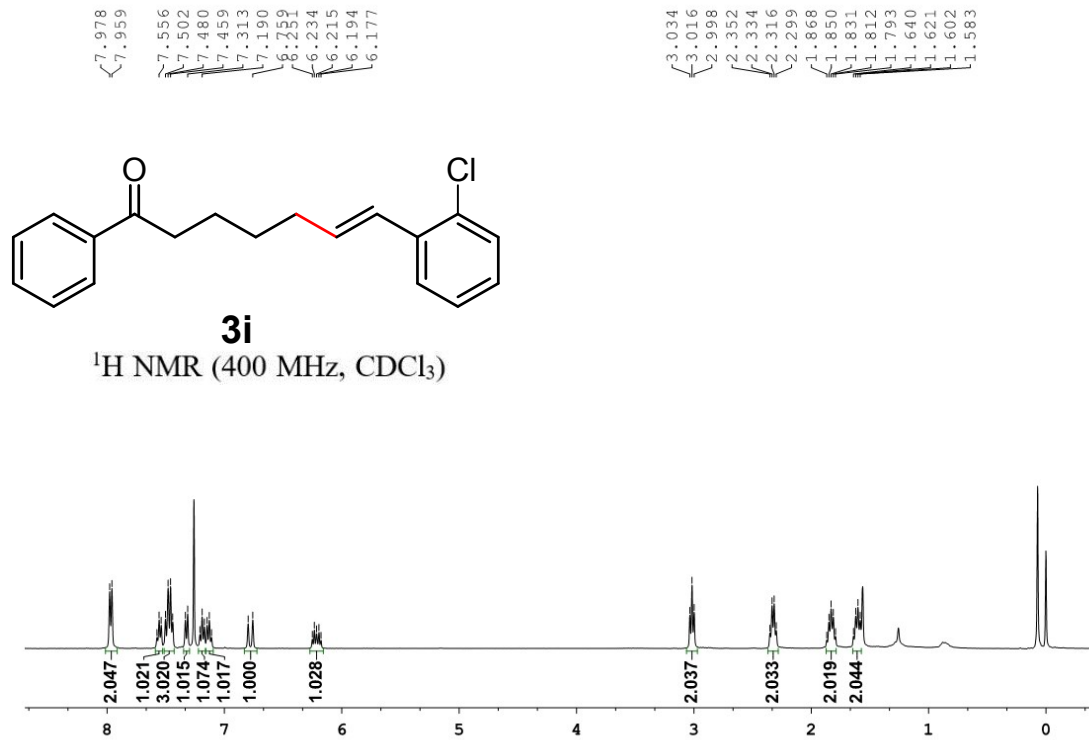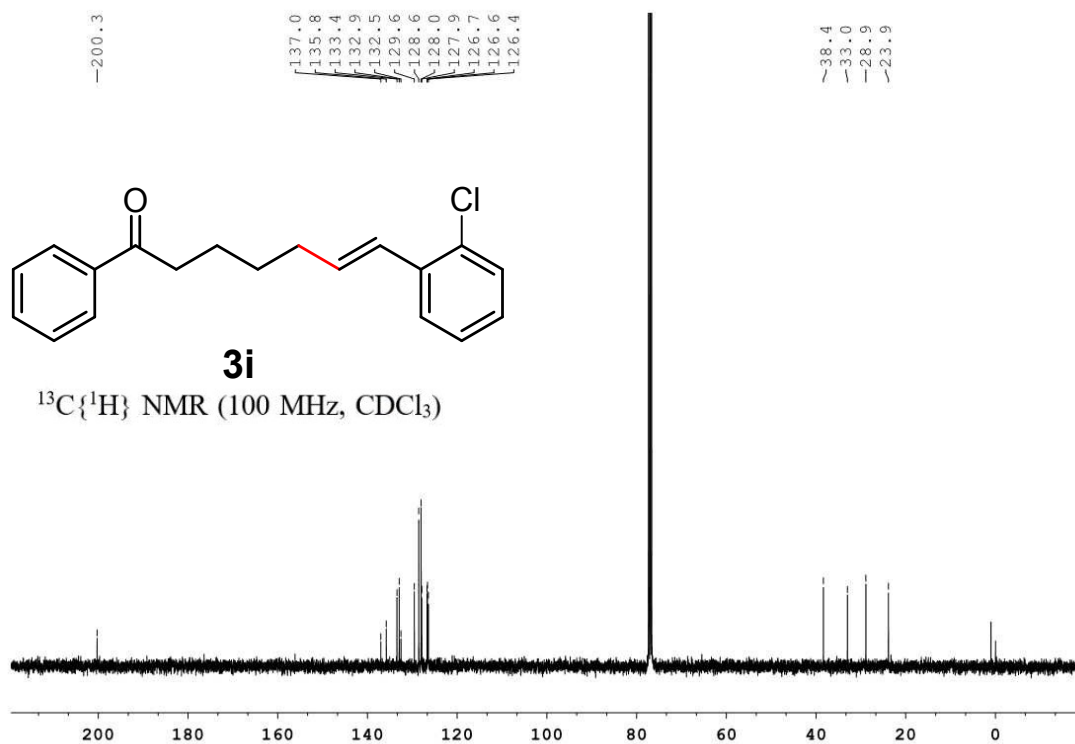

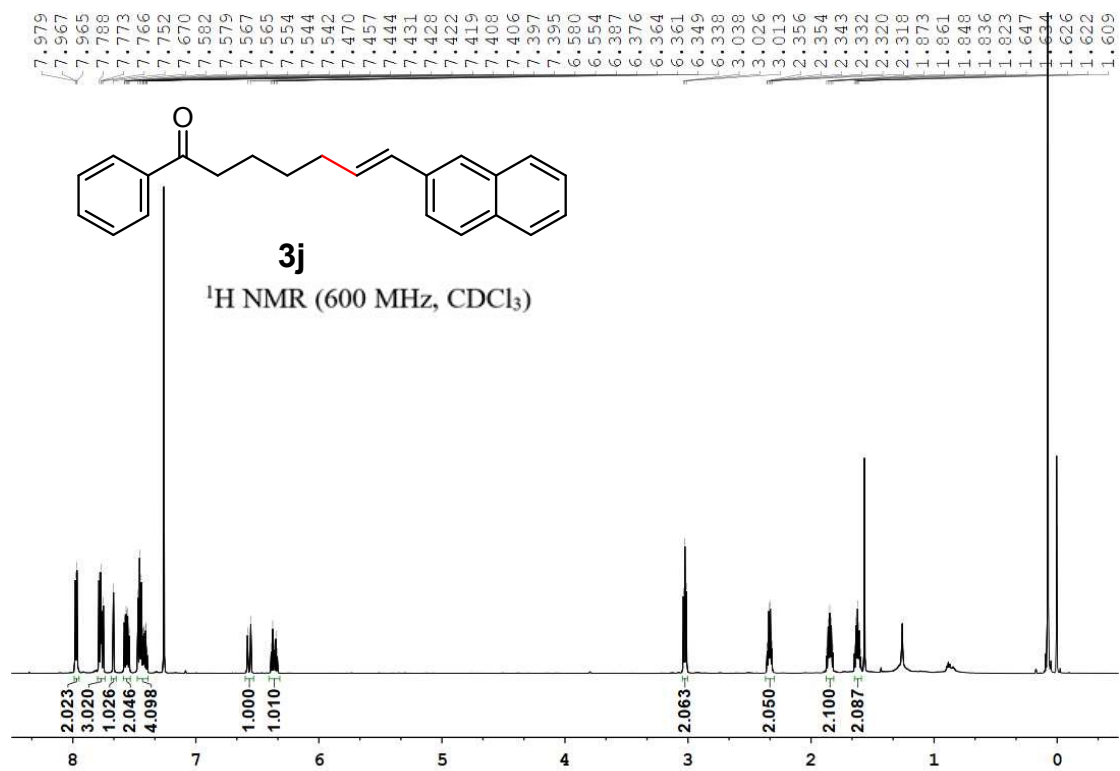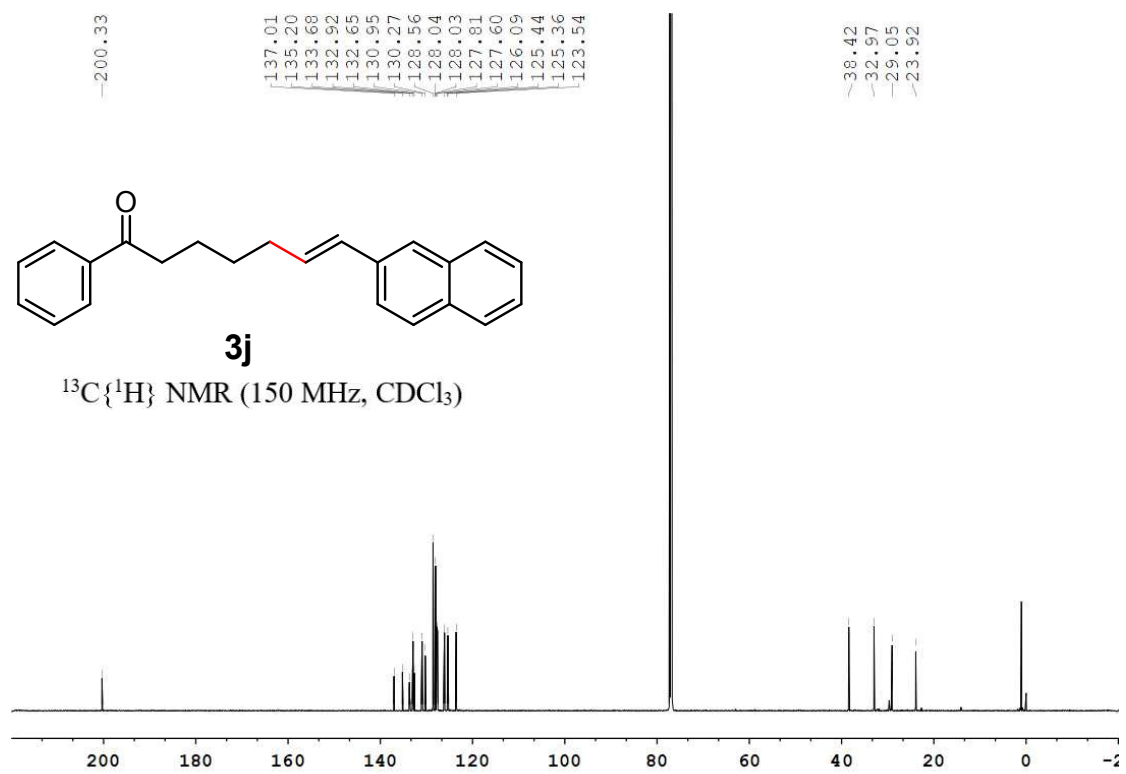

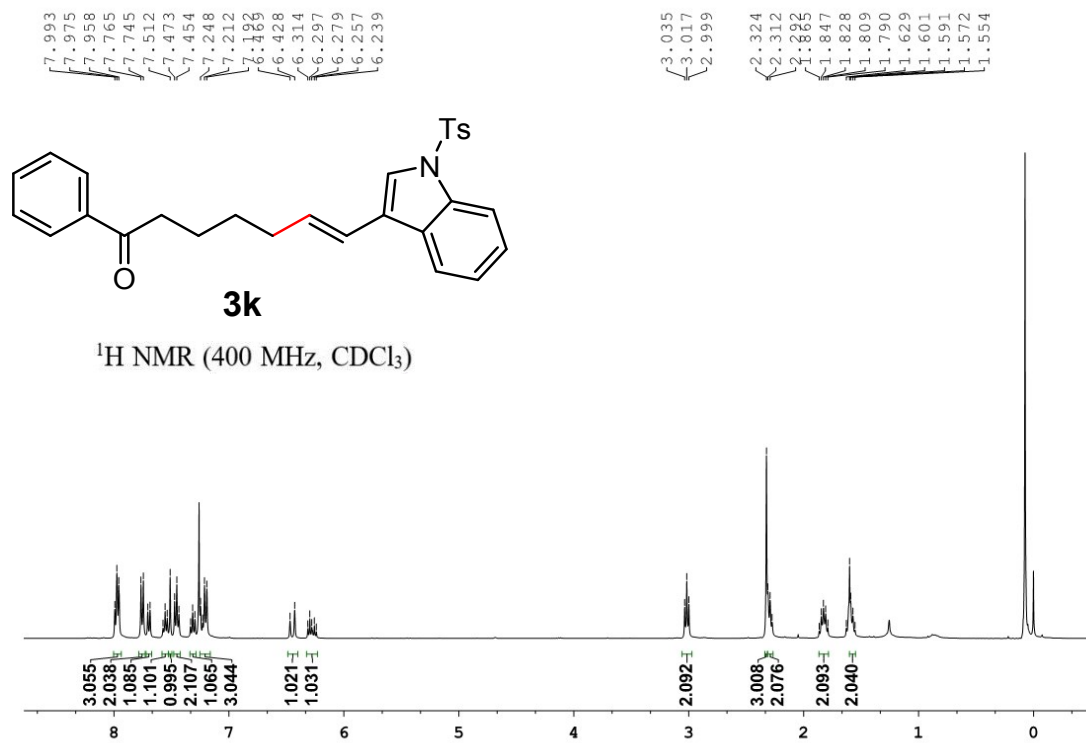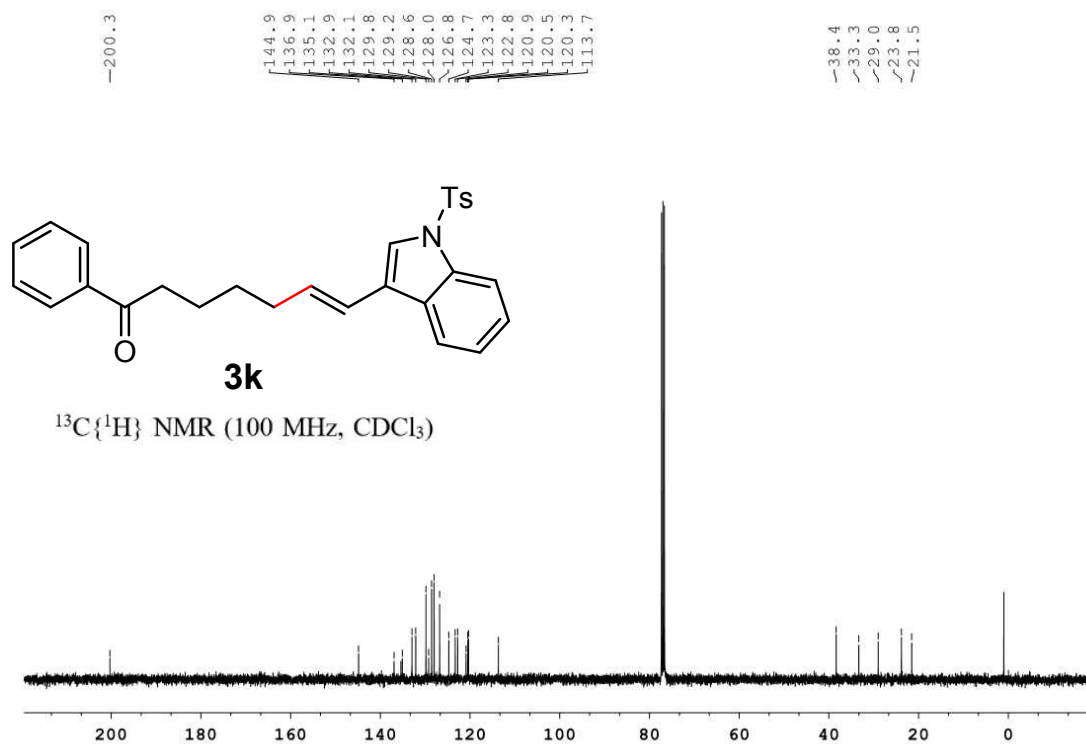



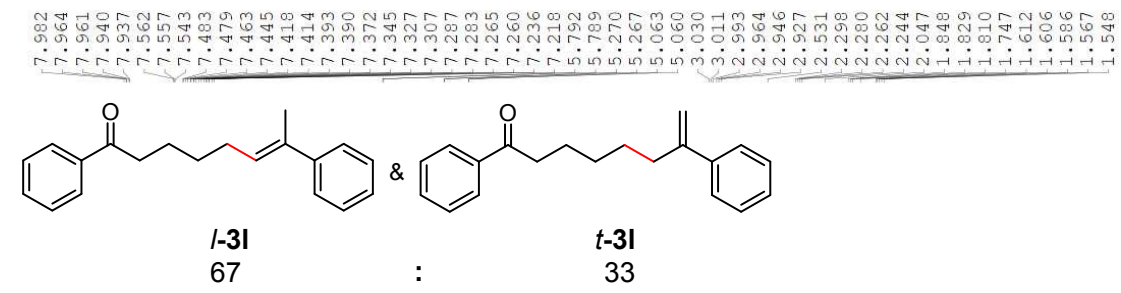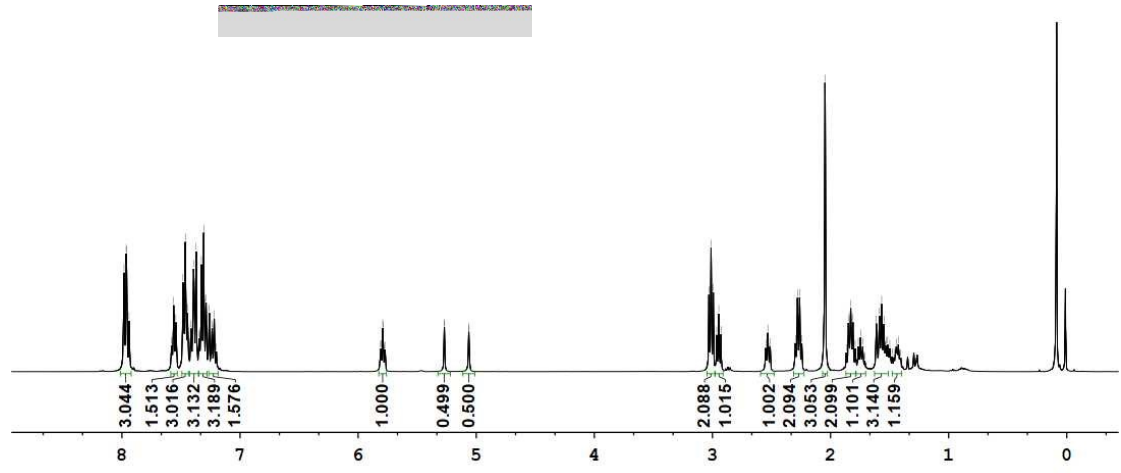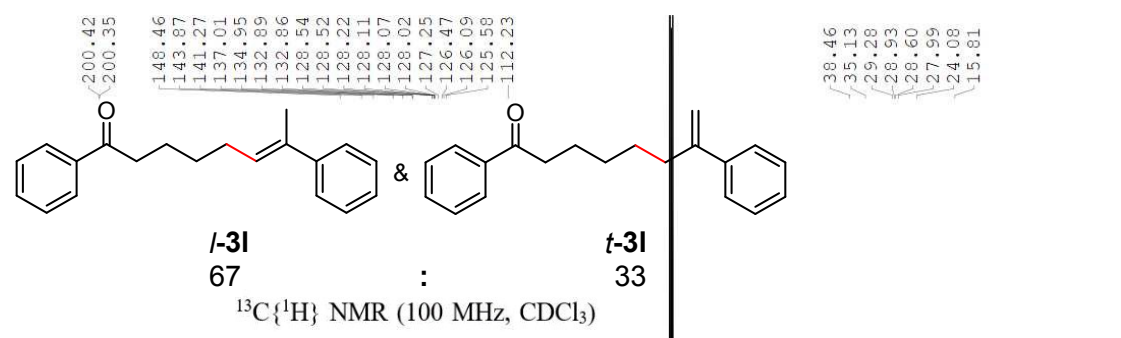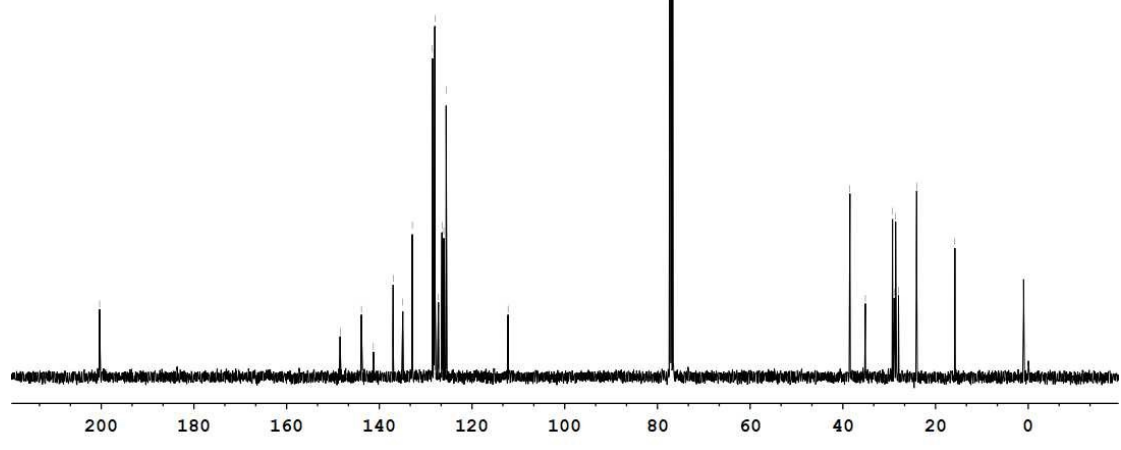

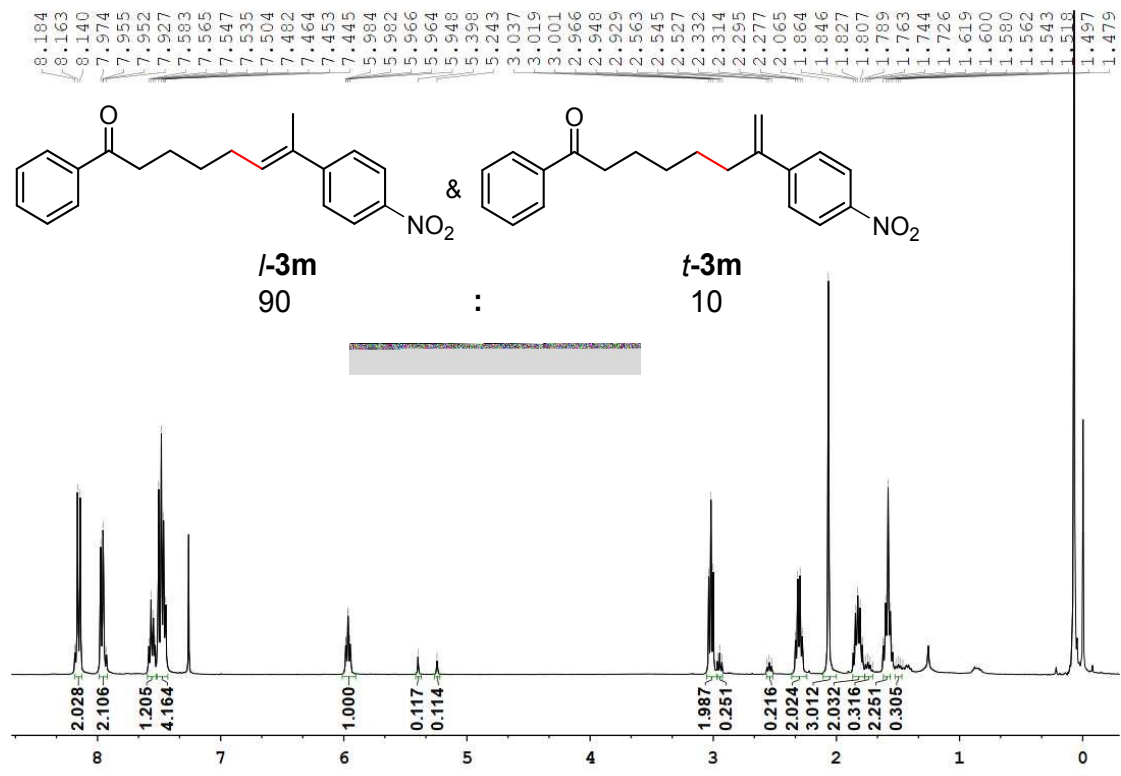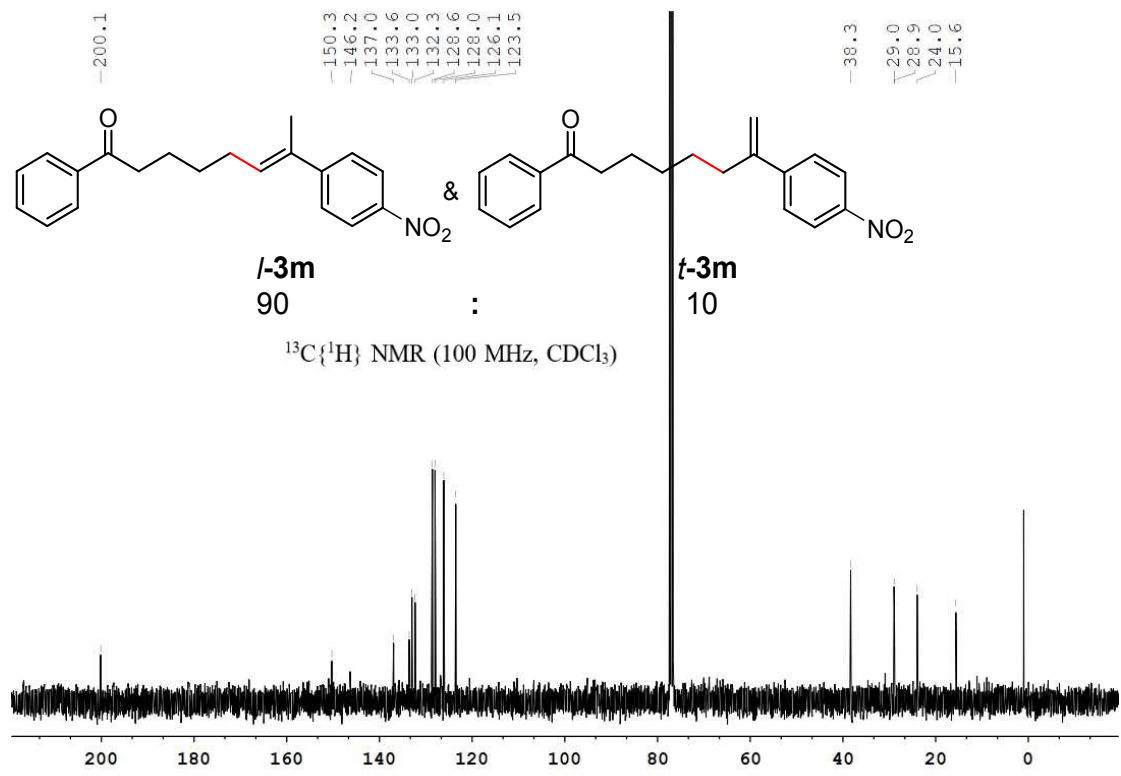

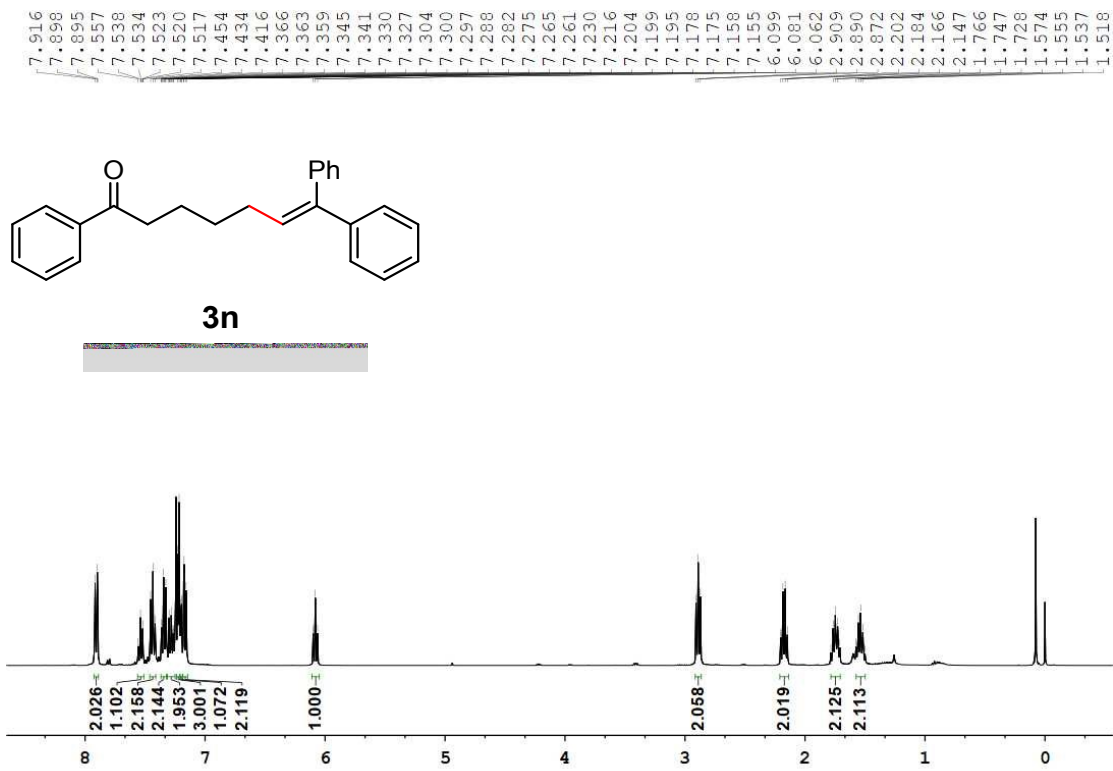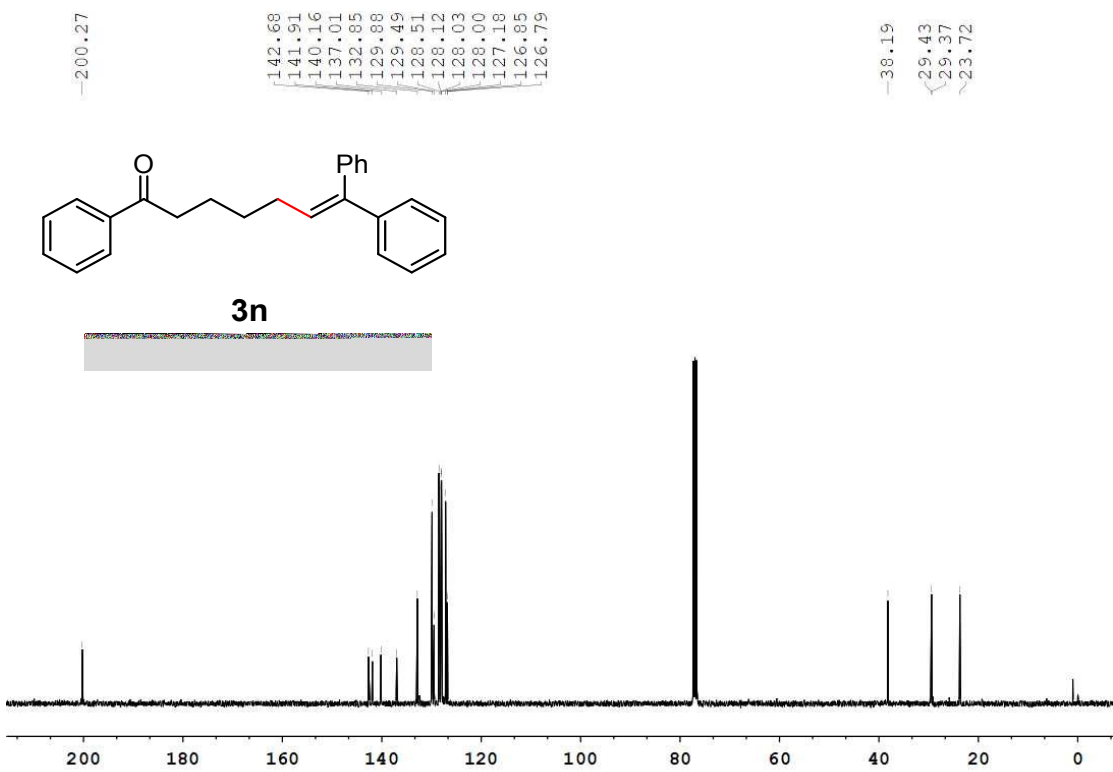

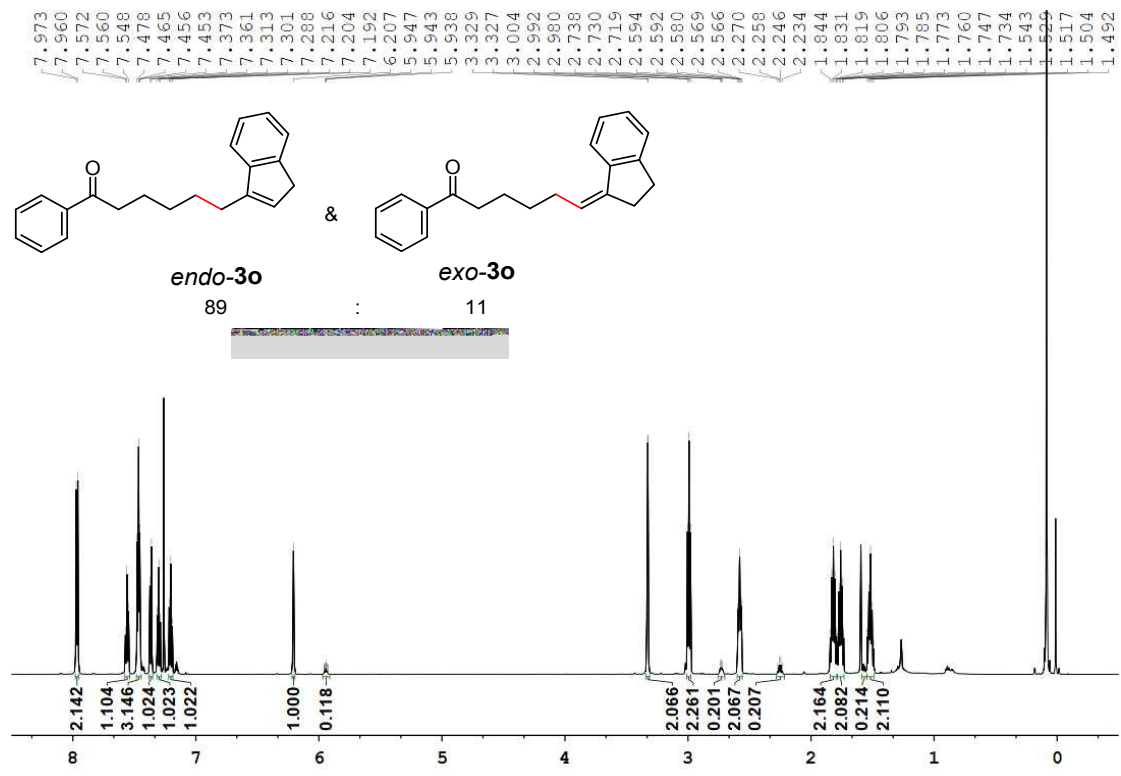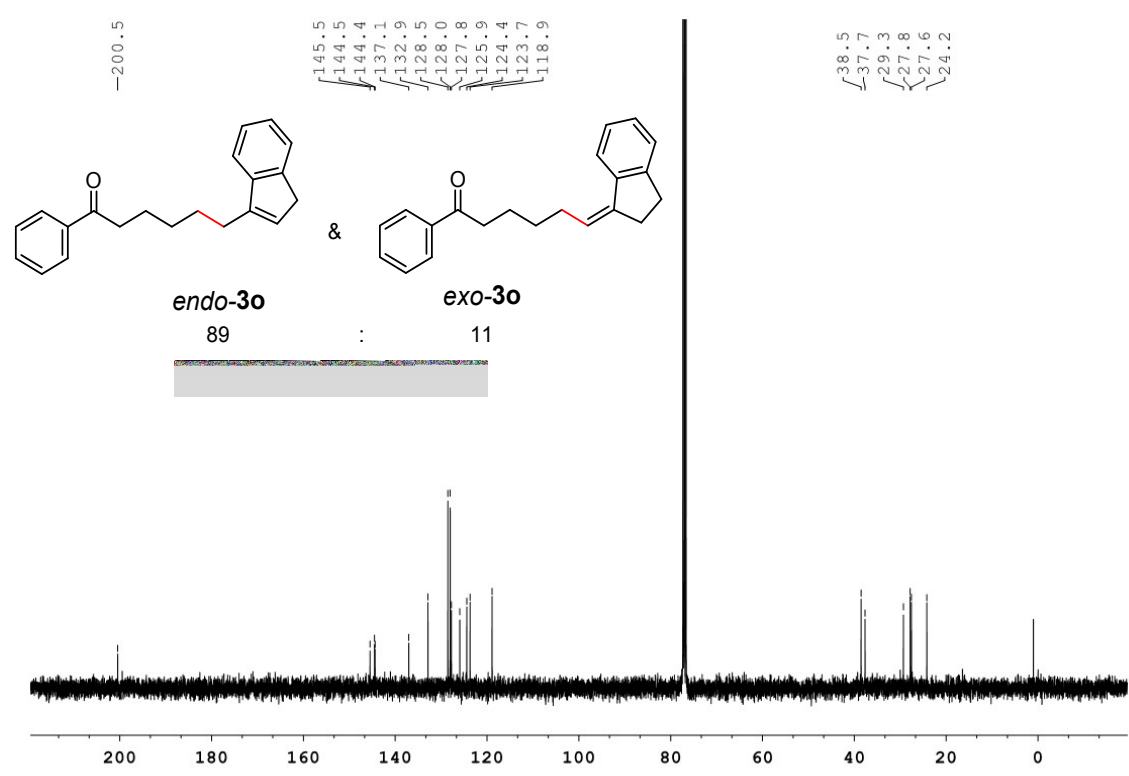

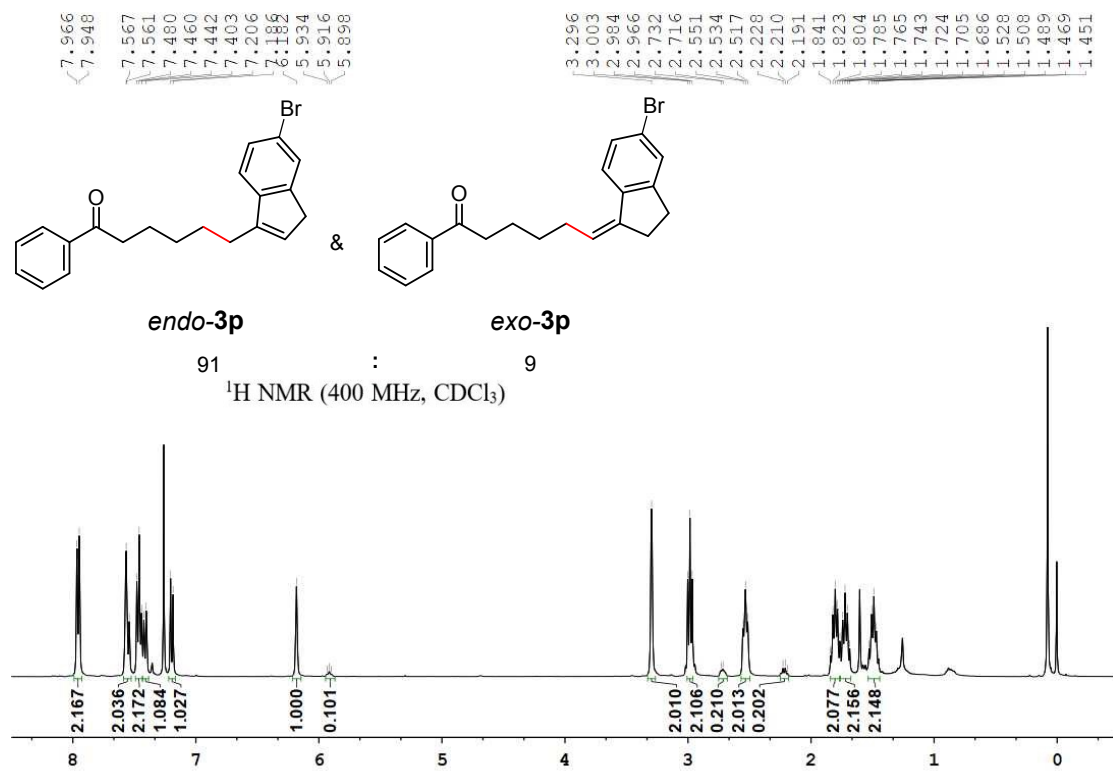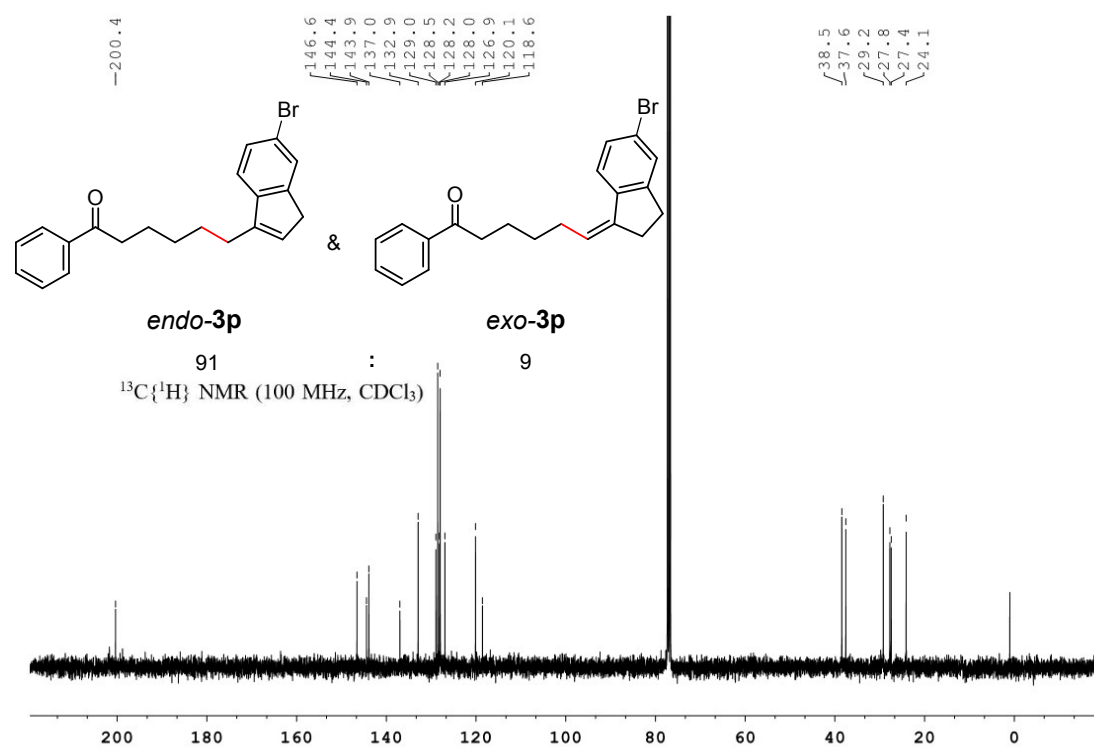

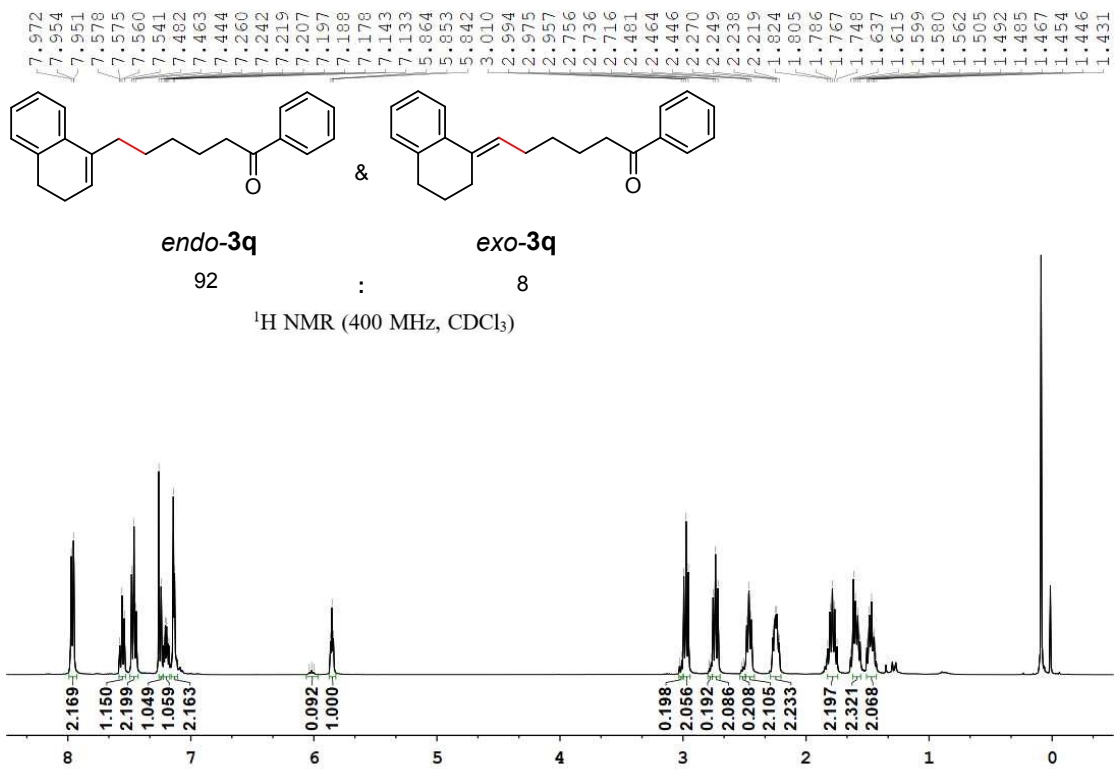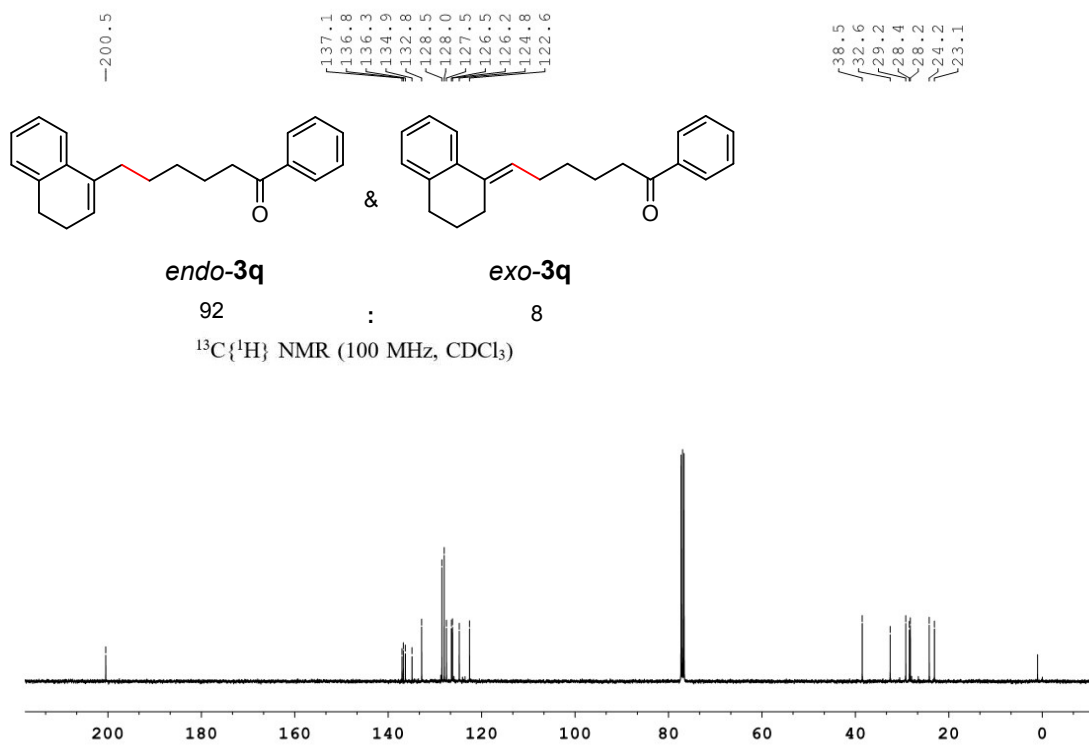

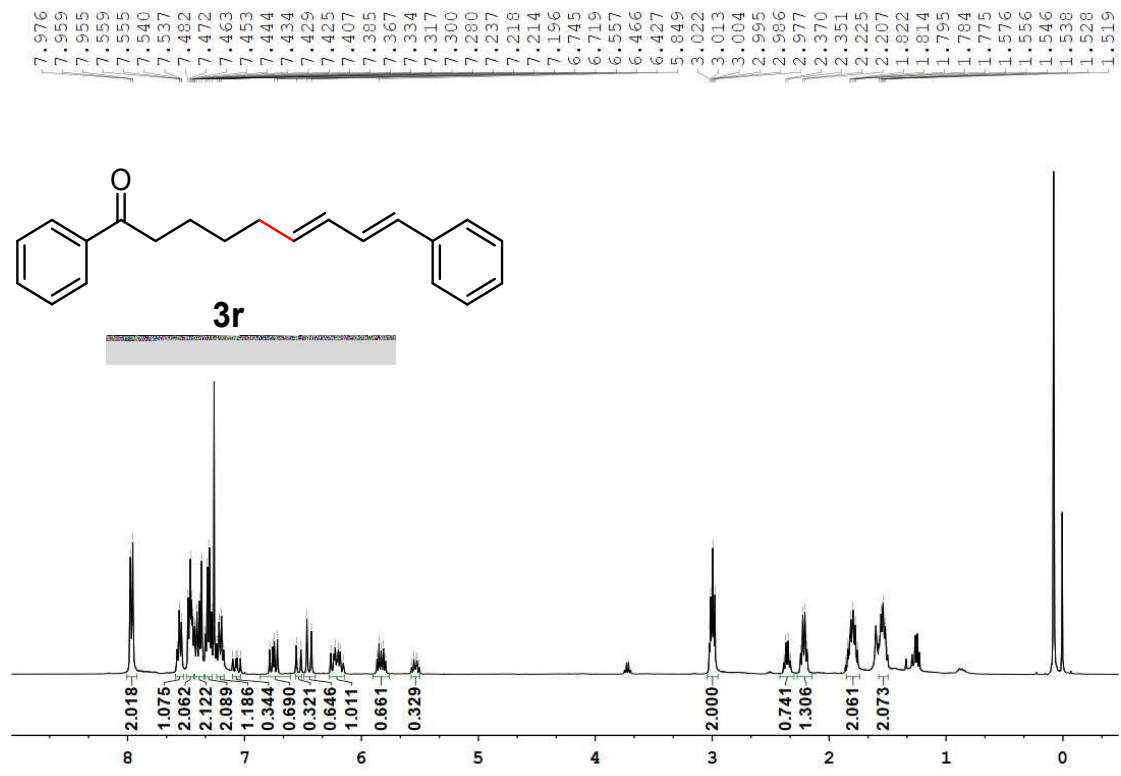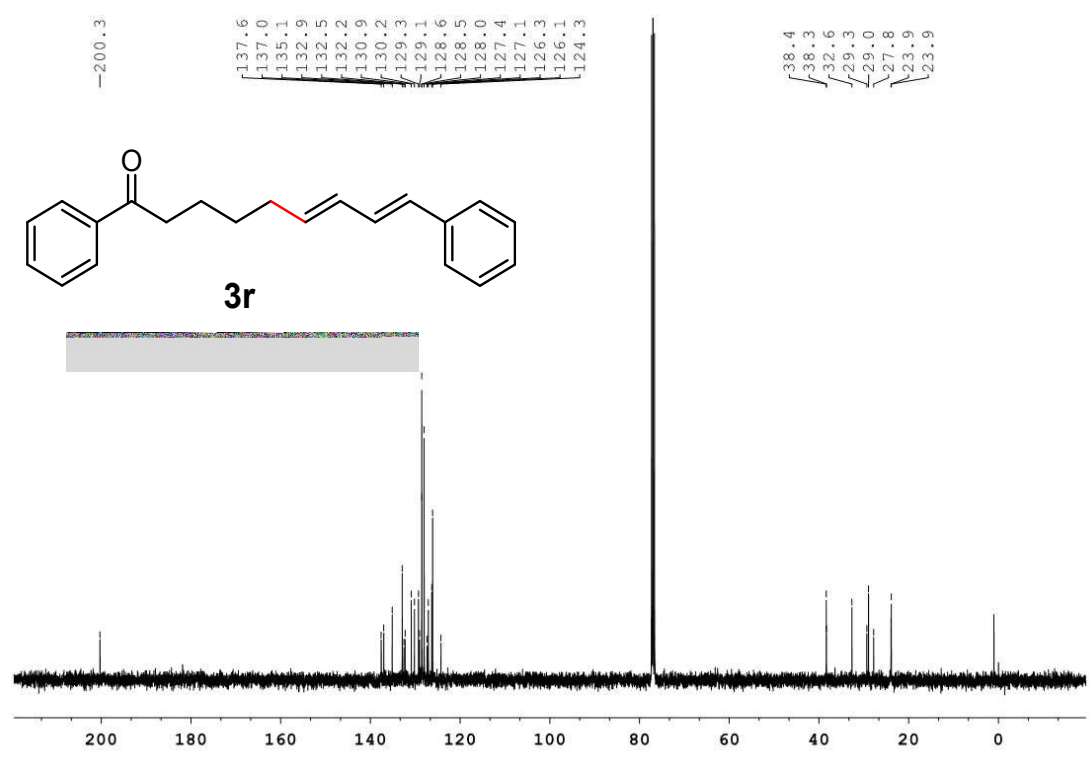

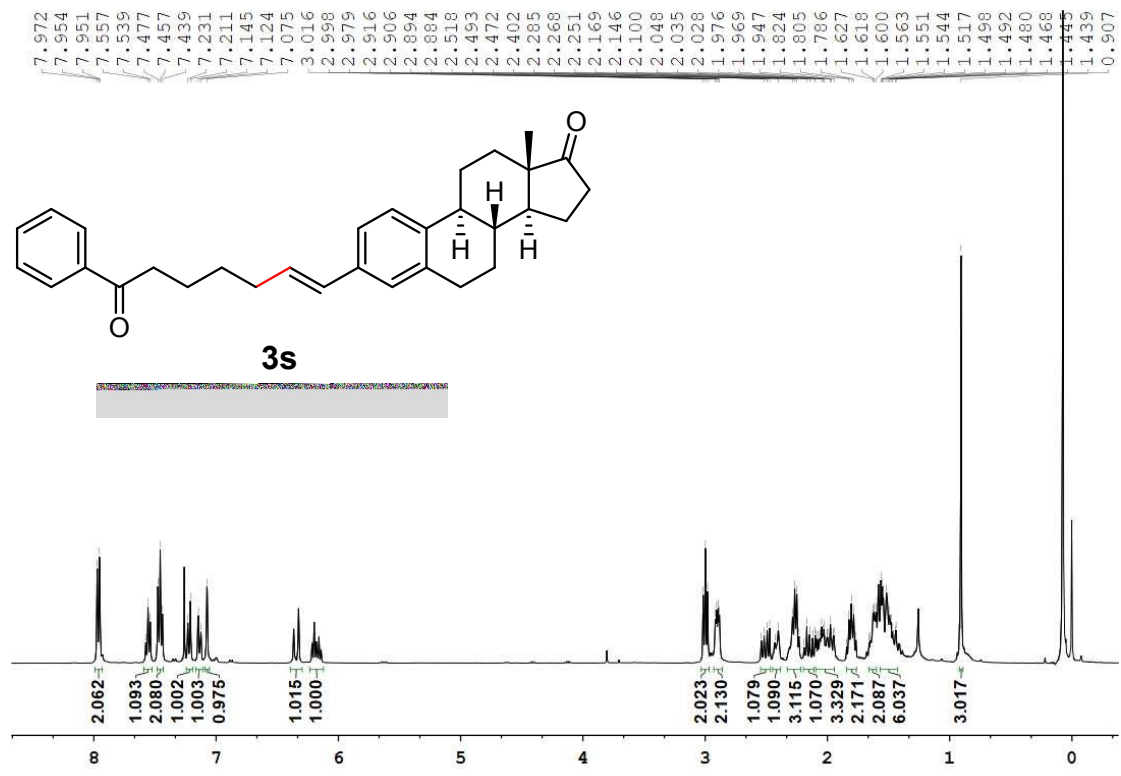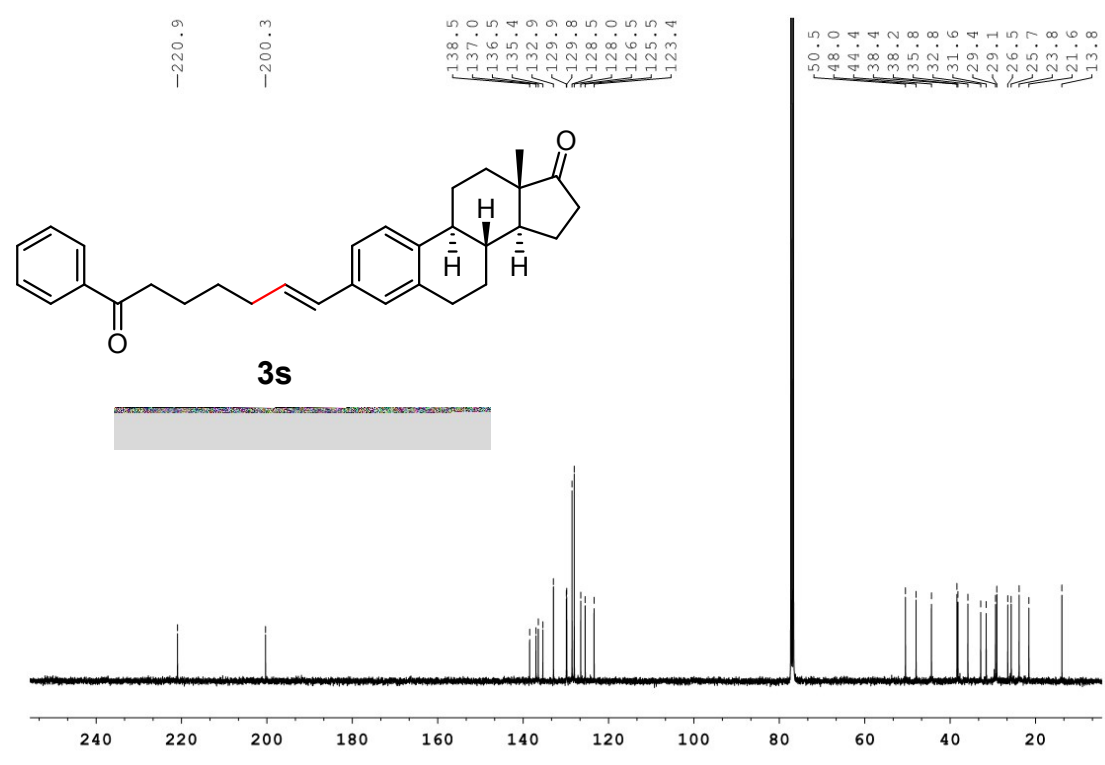



# <sup>1</sup>H NMR and <sup>13</sup>C NMR Spectra of the Products 4

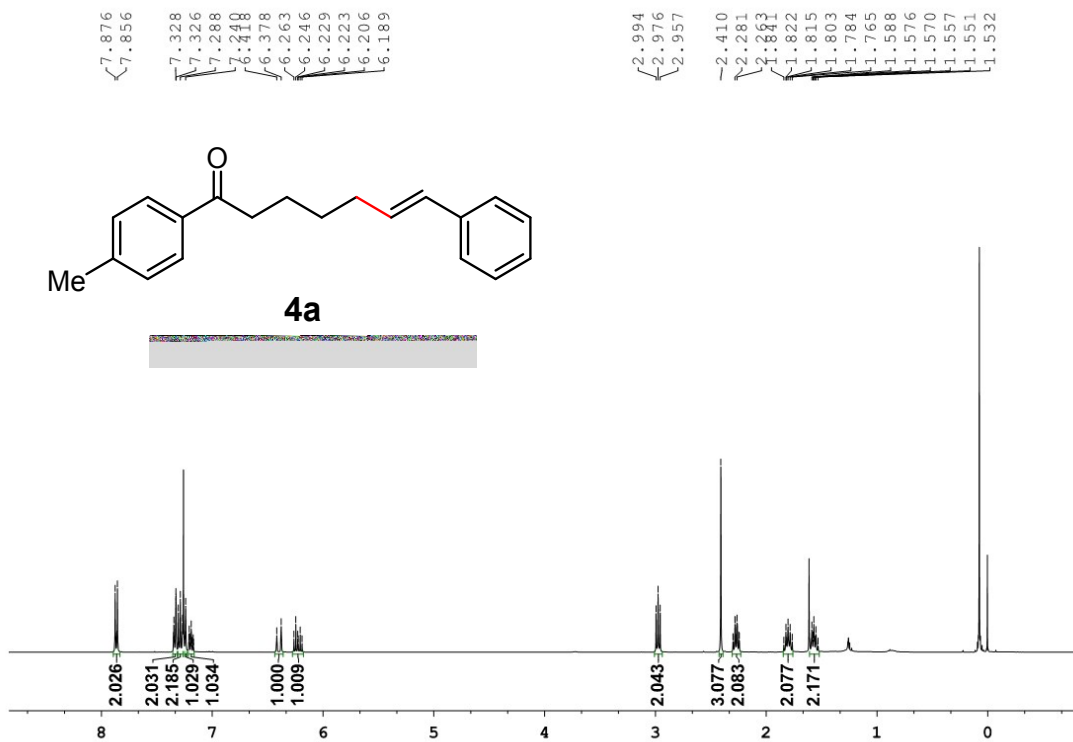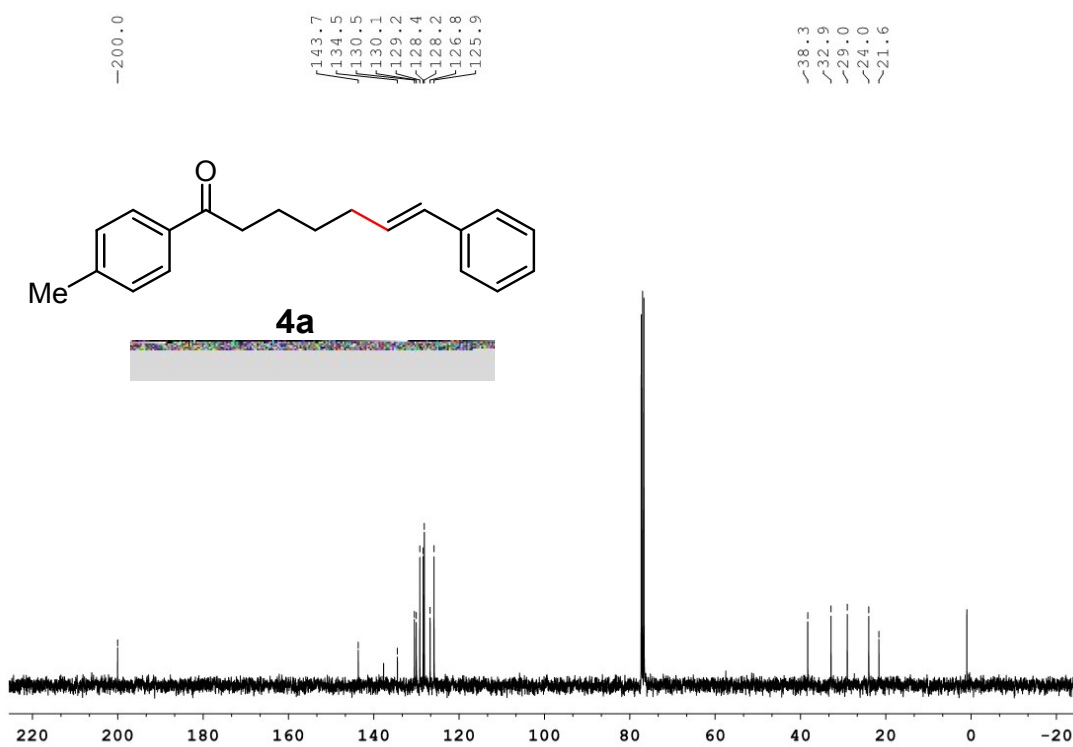

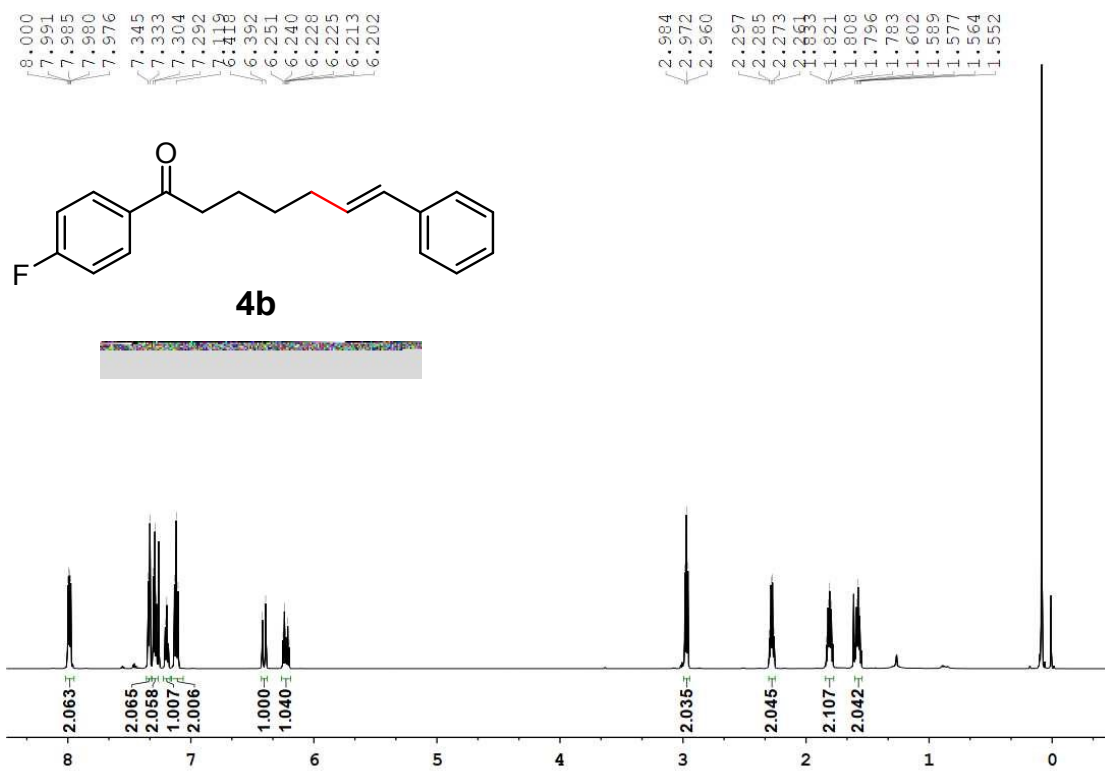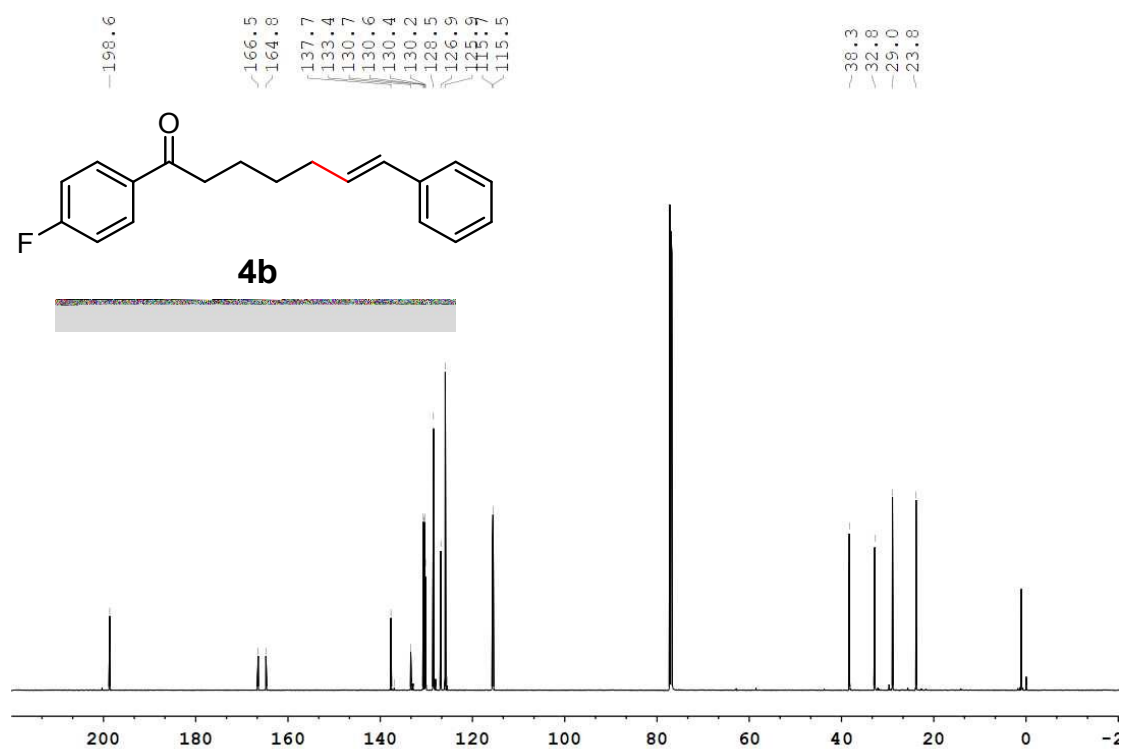

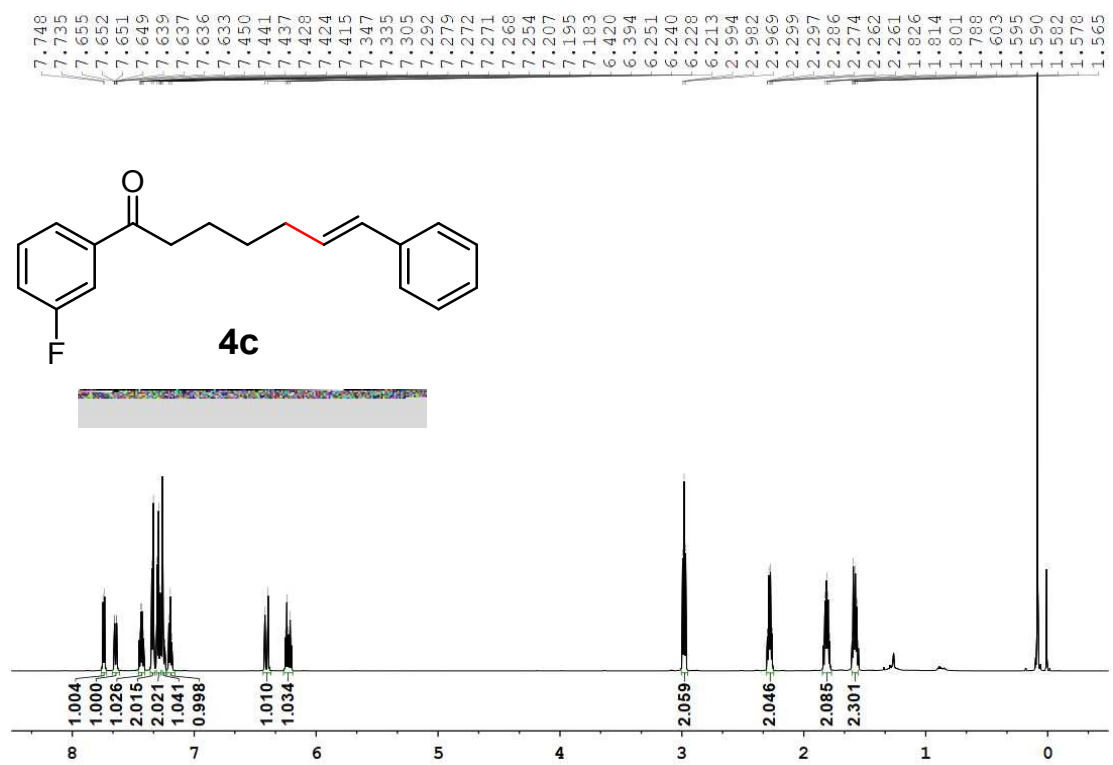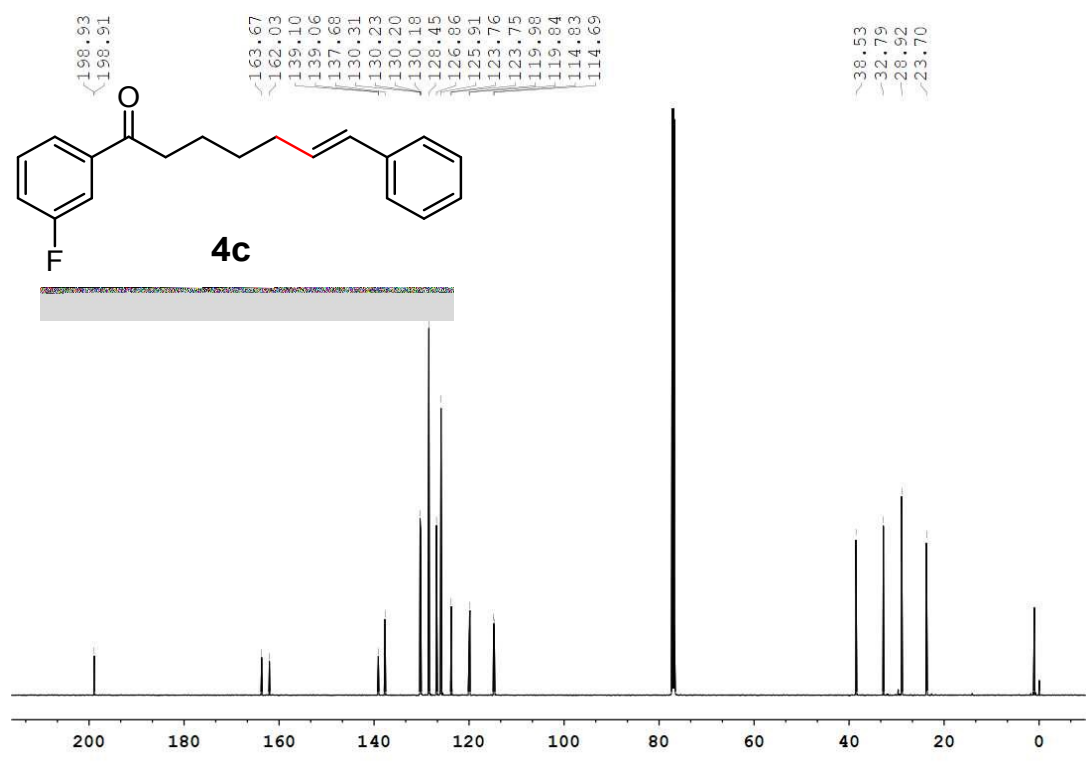

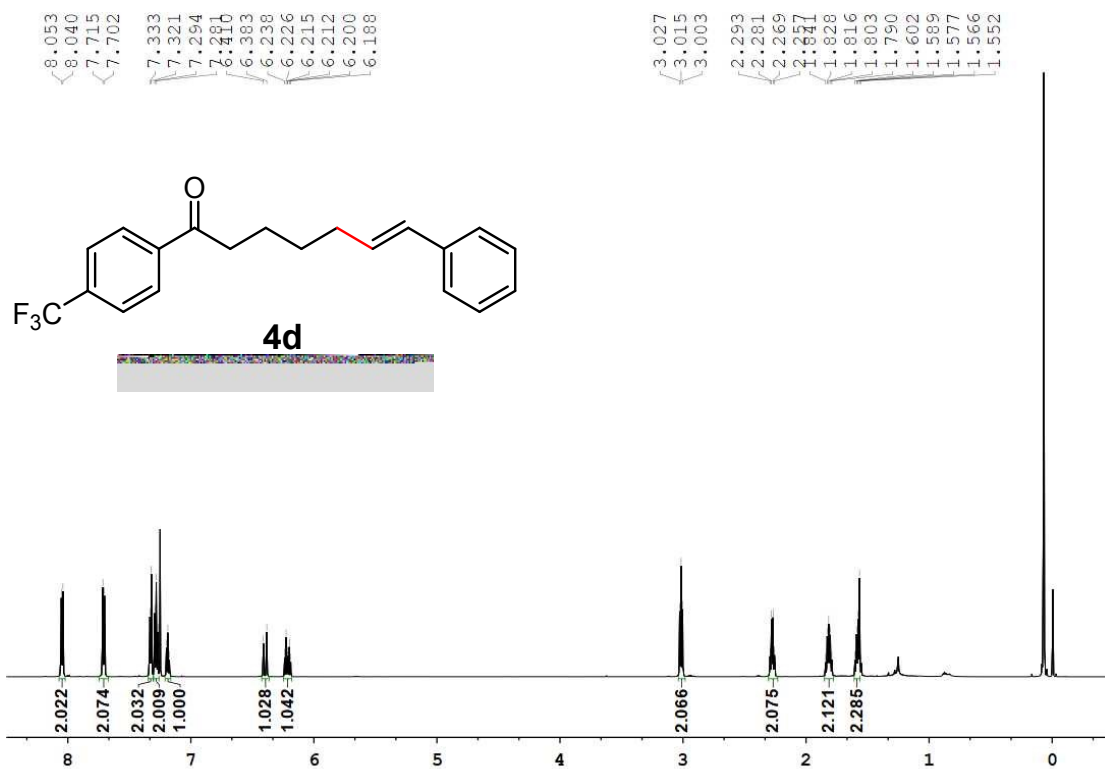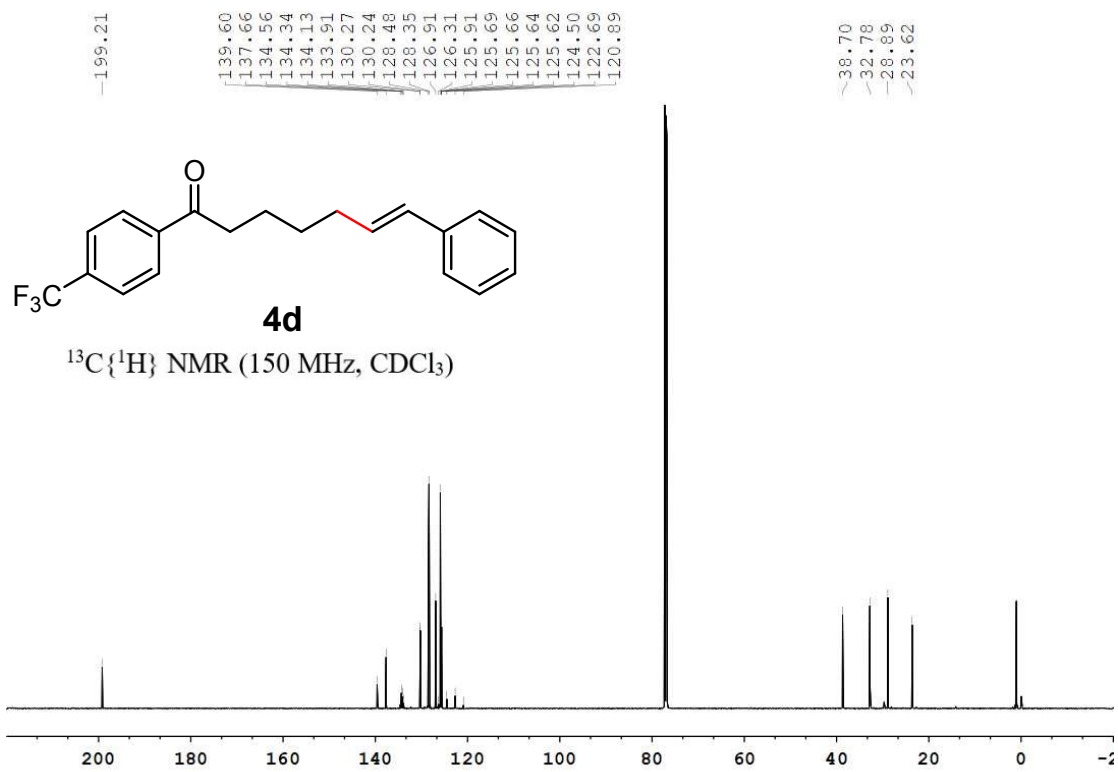

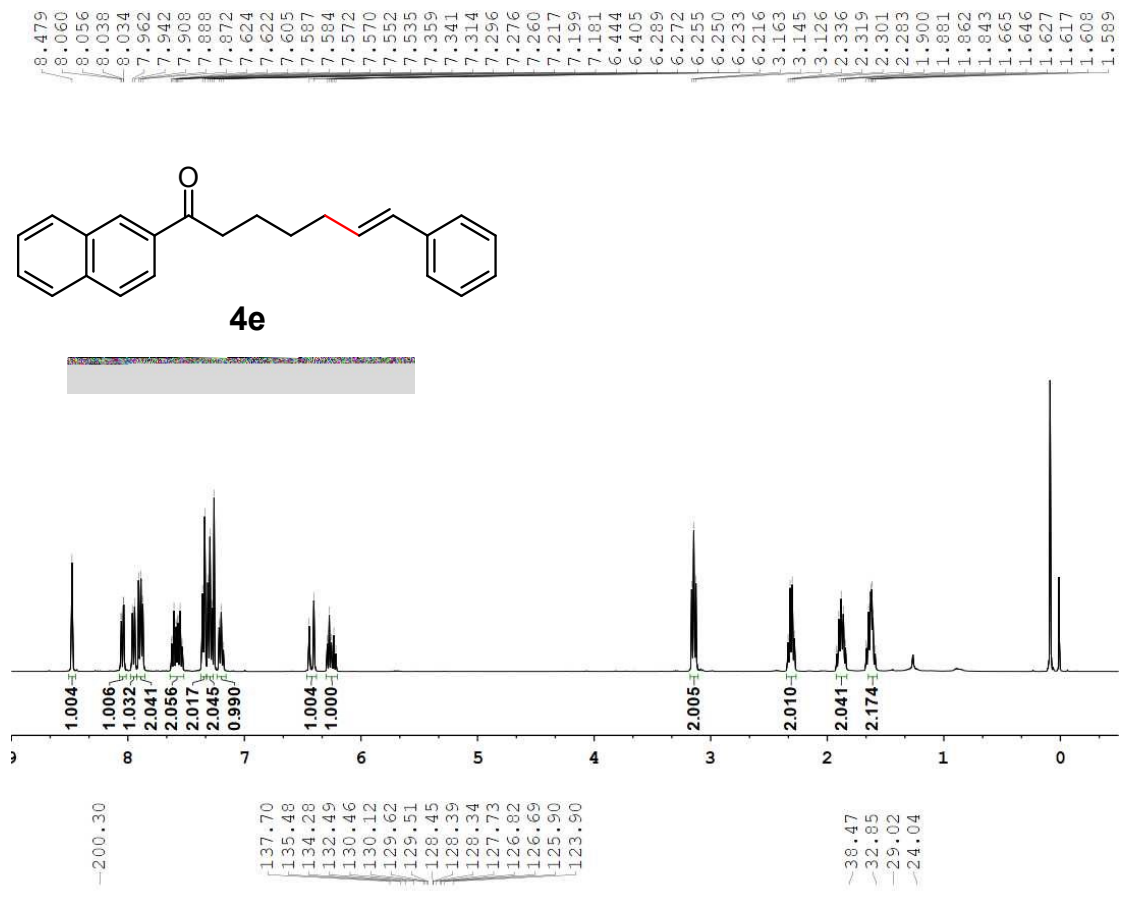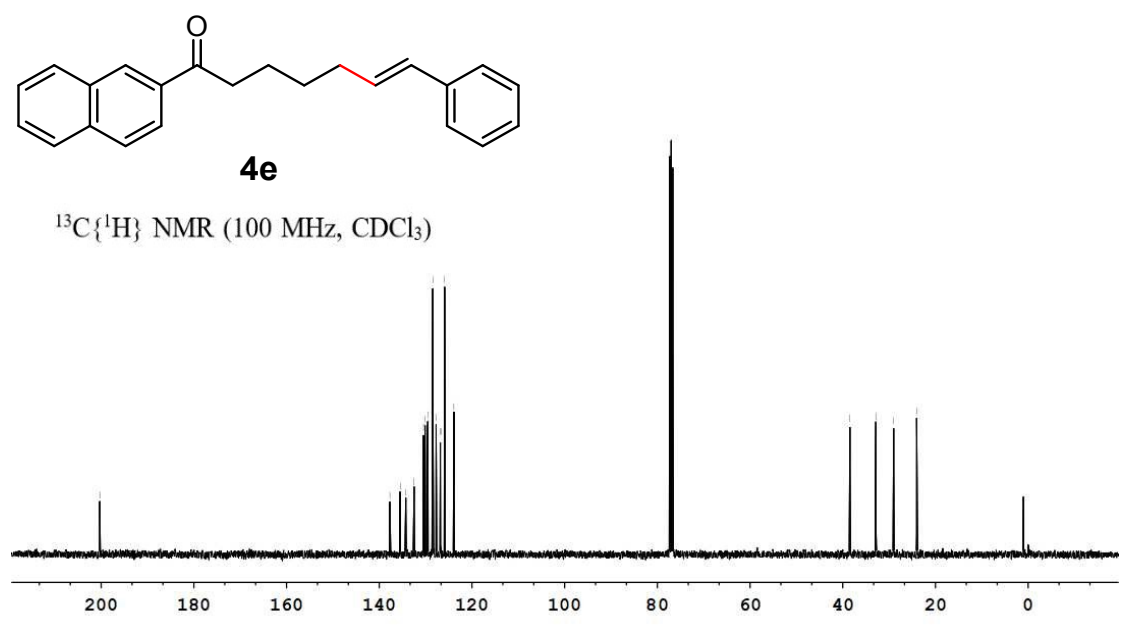

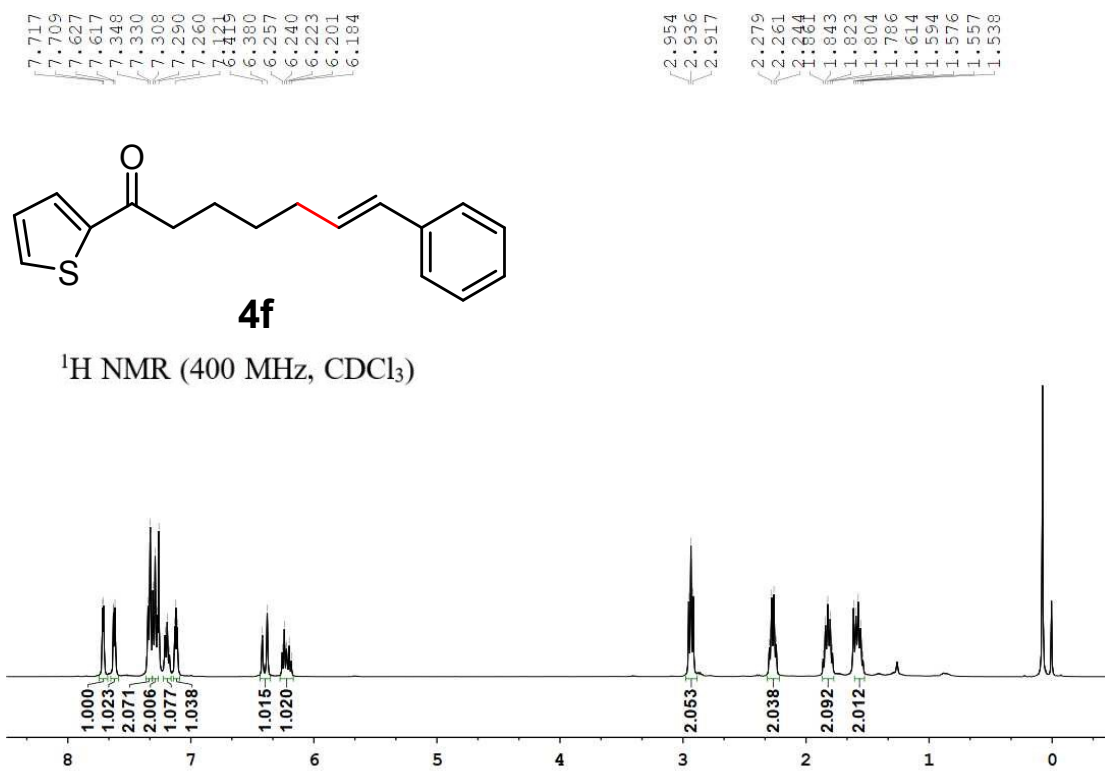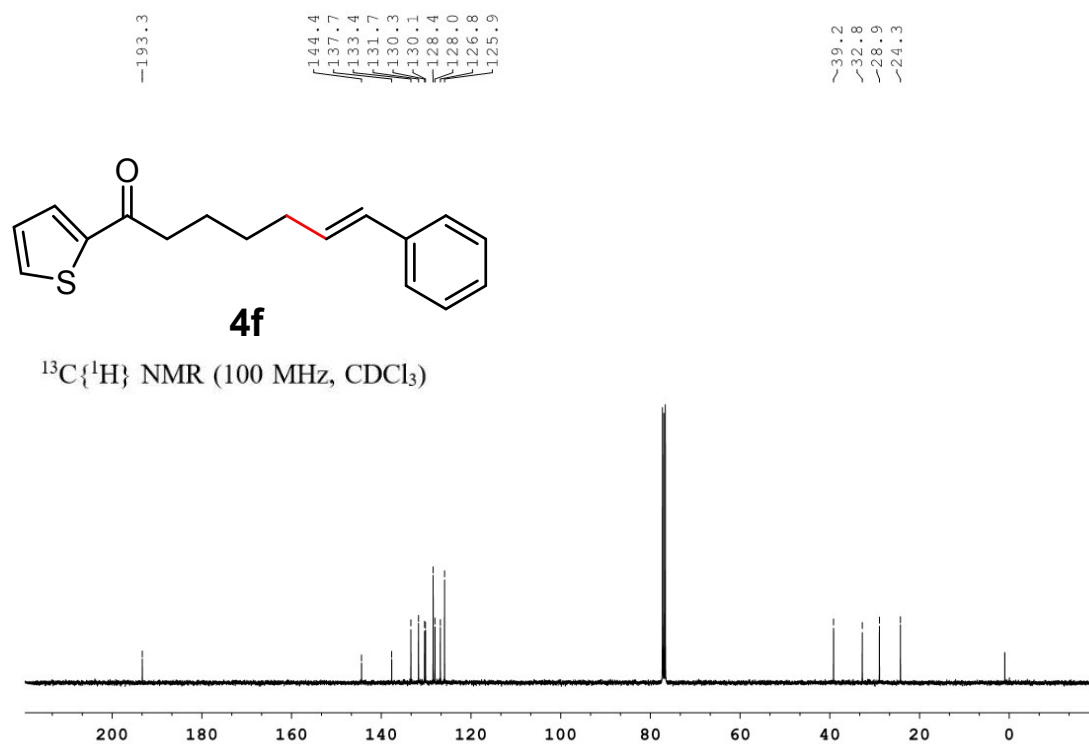

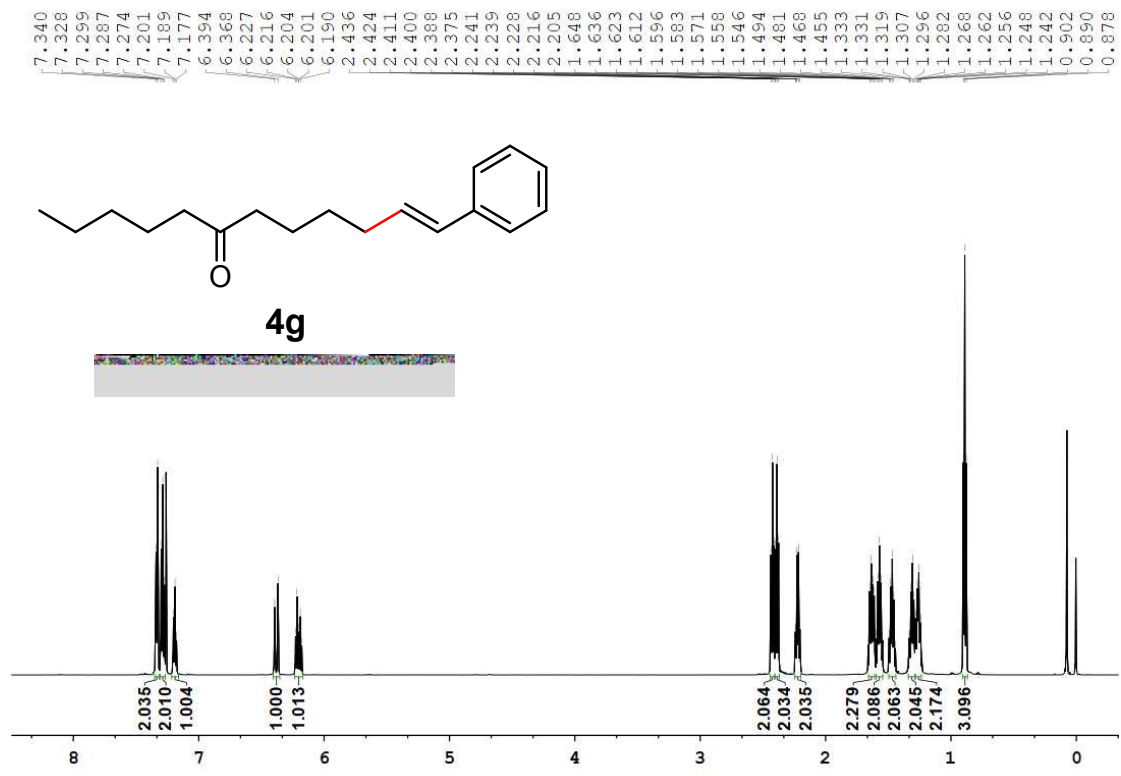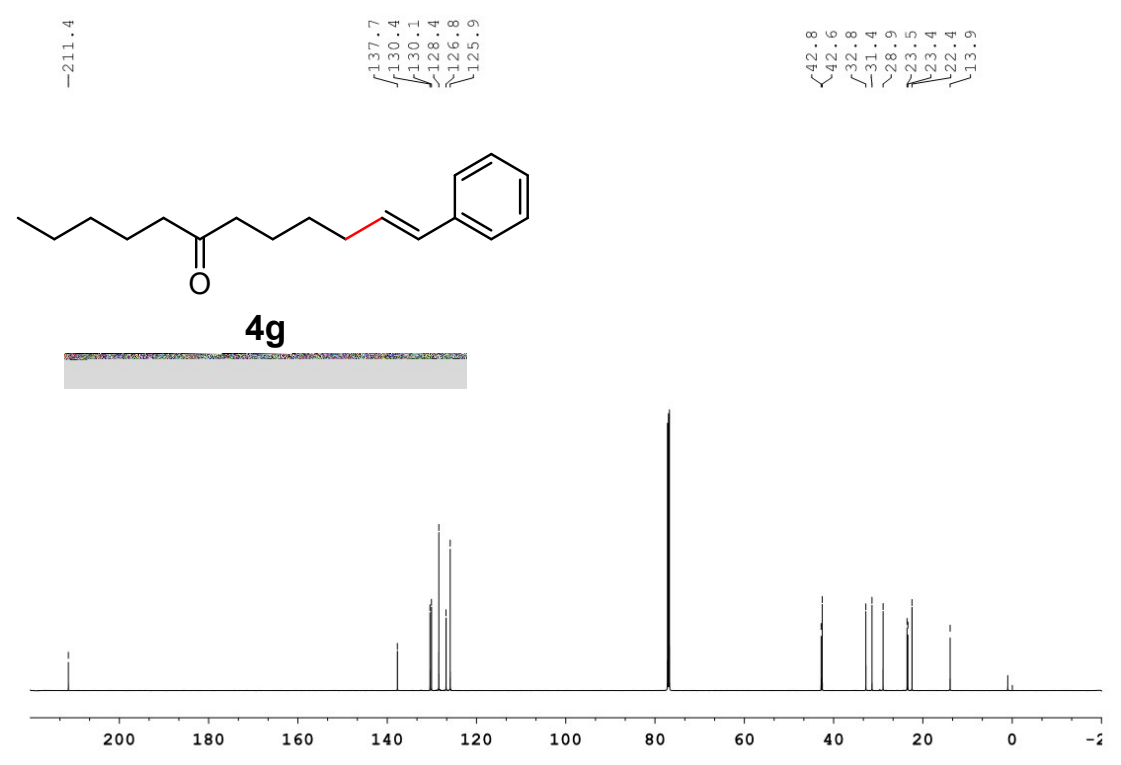

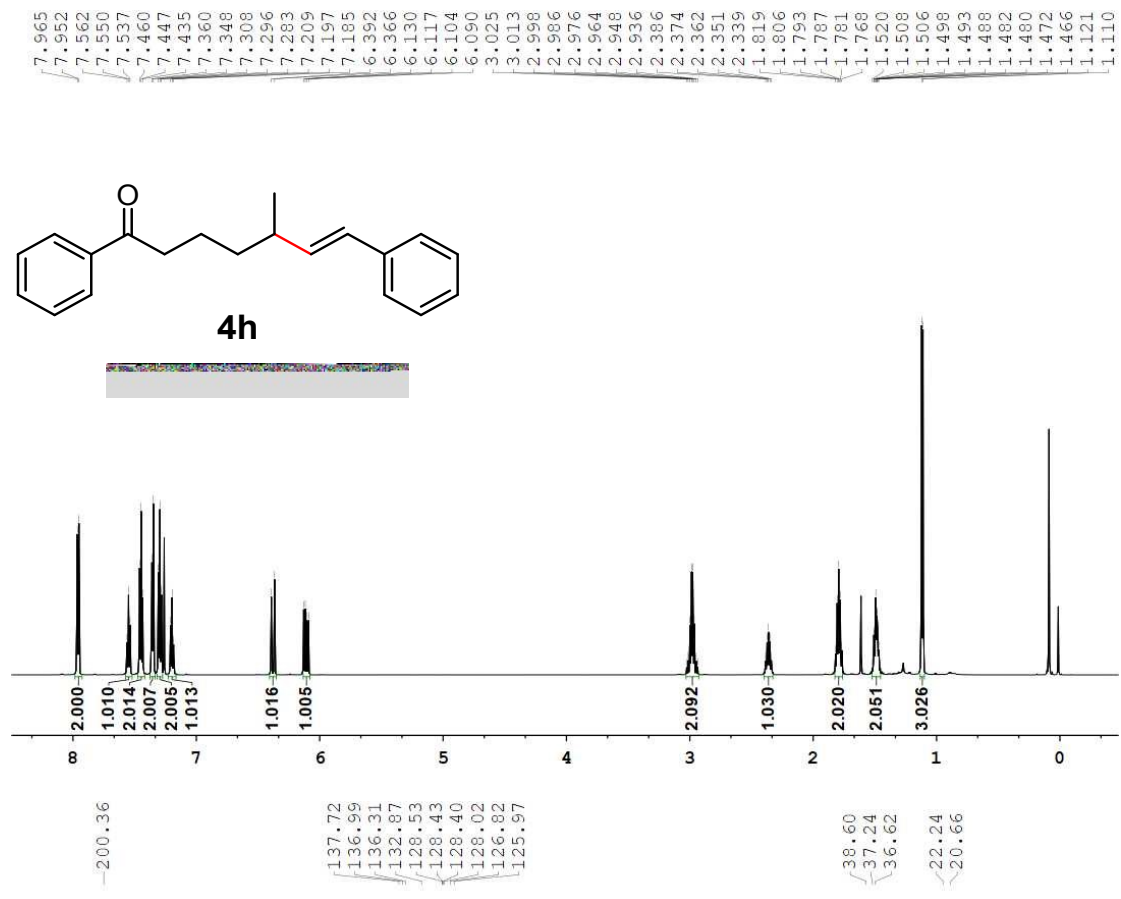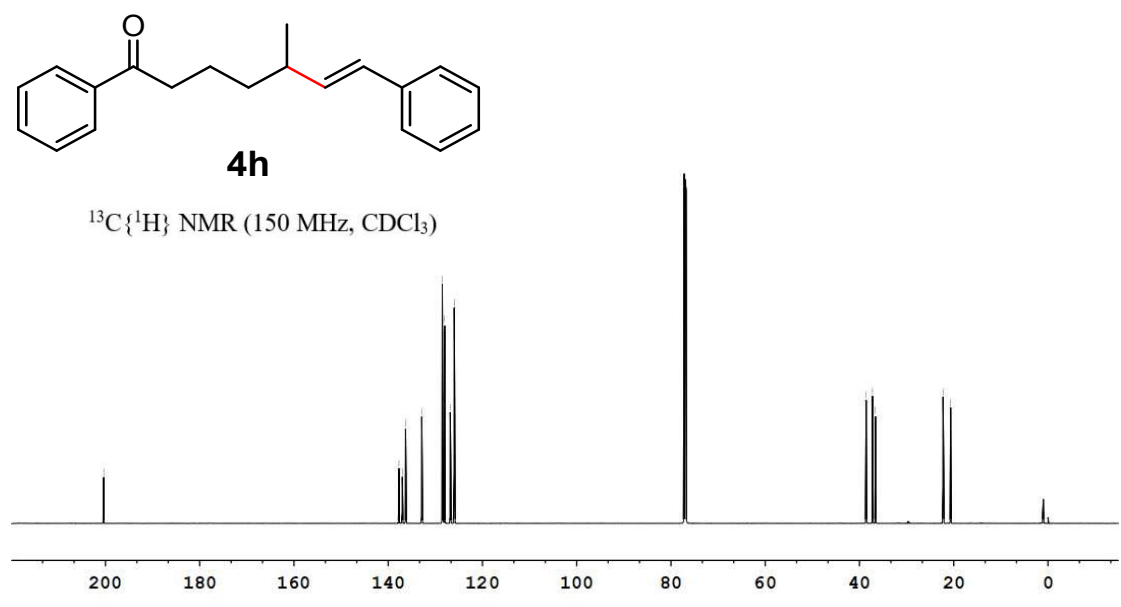



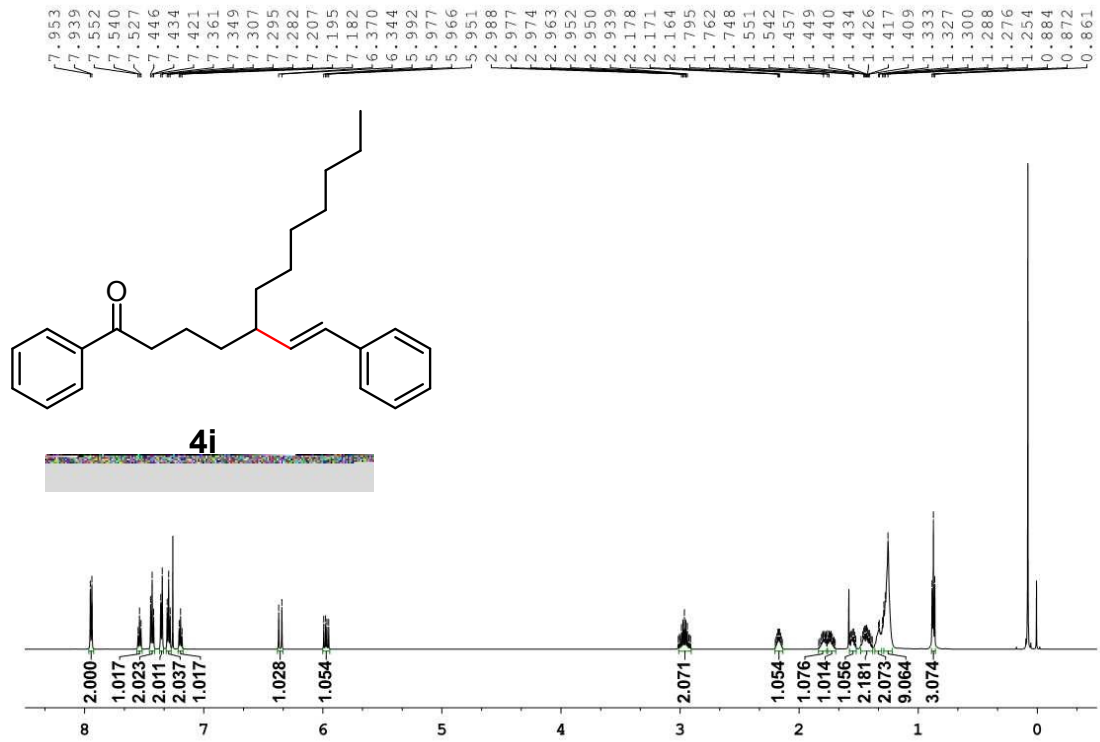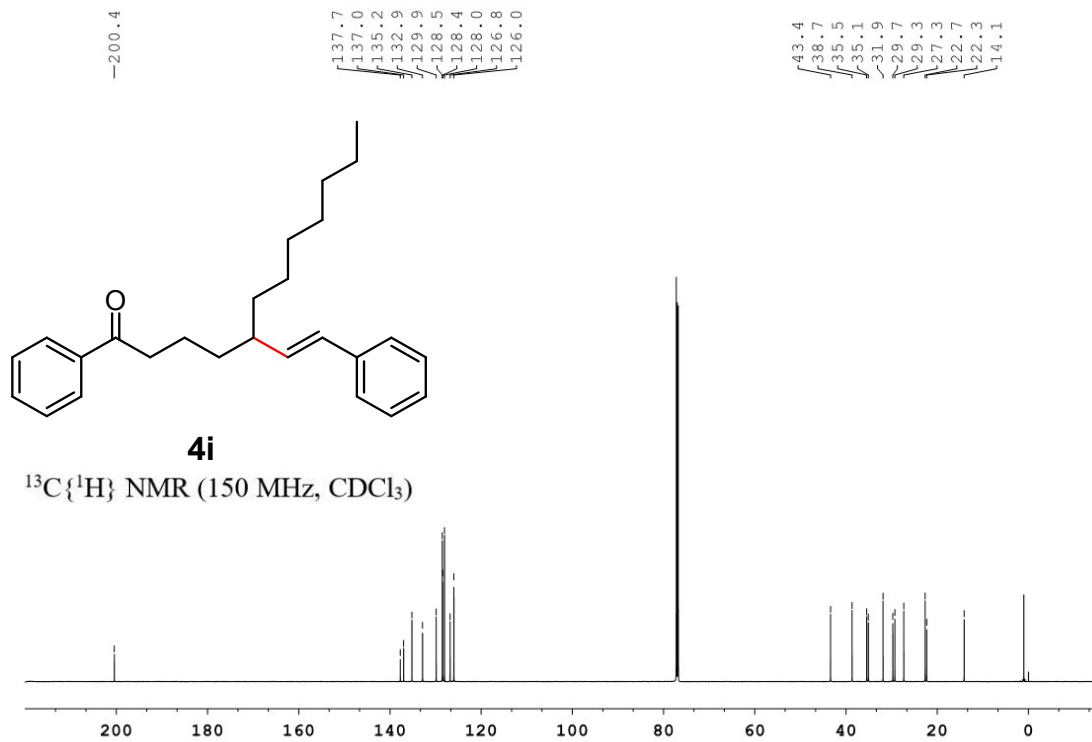

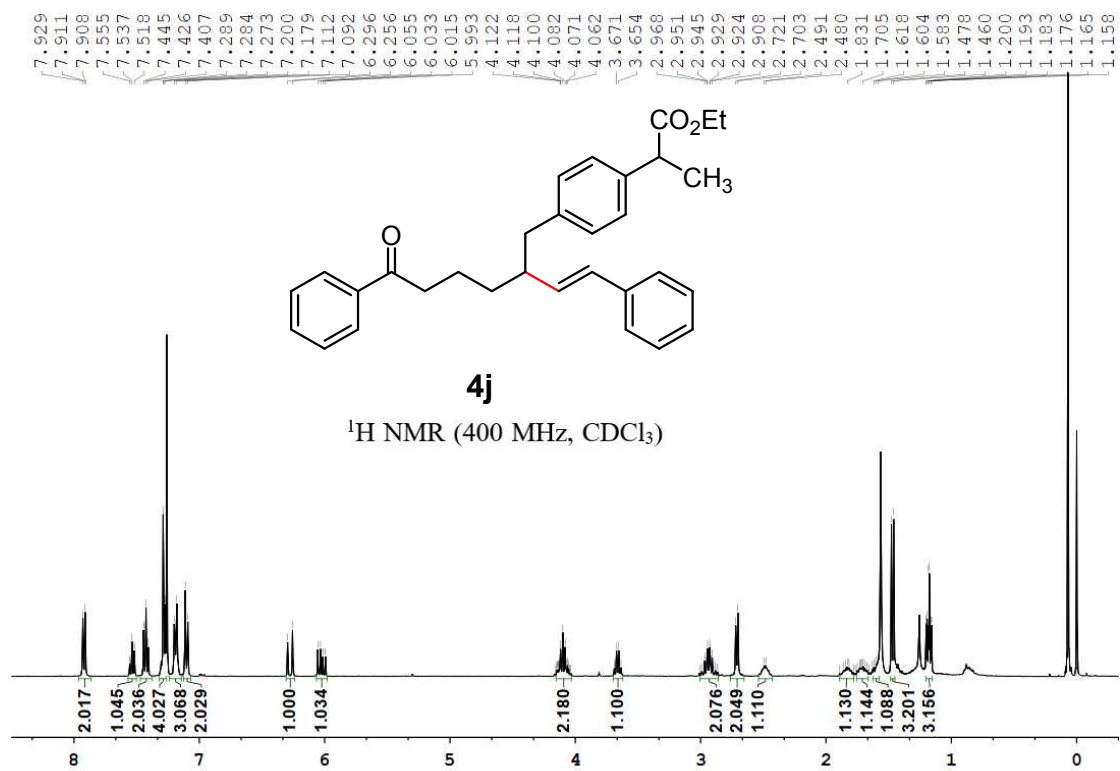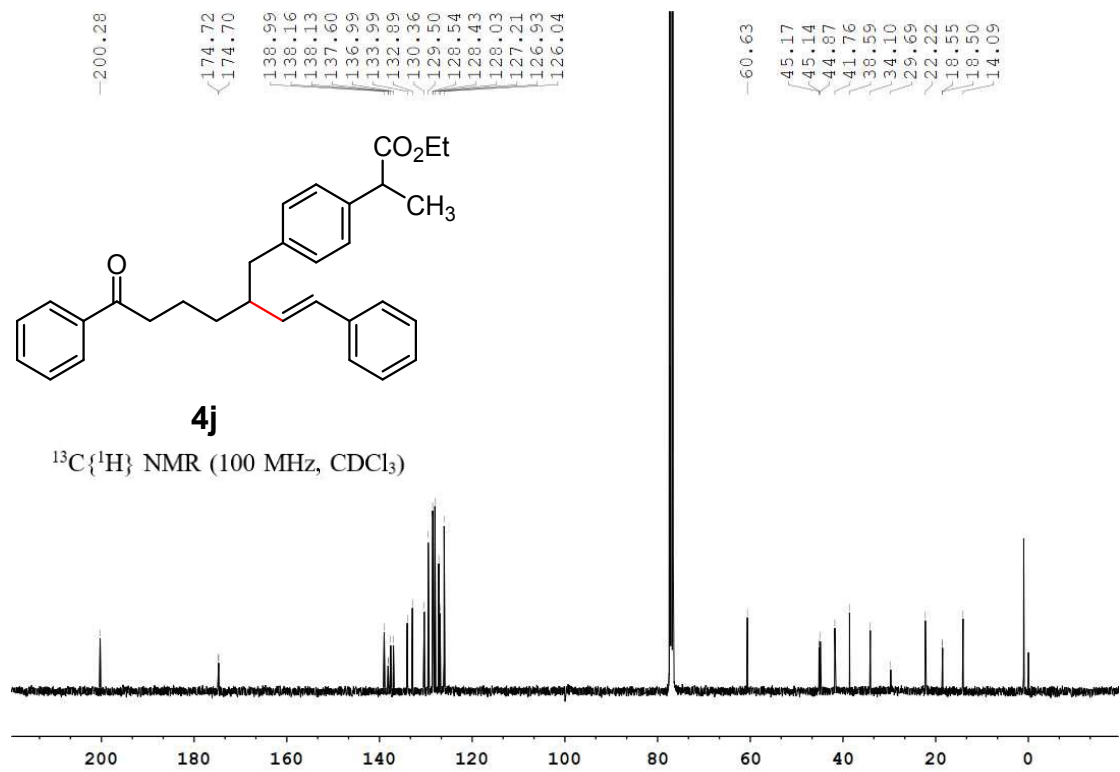

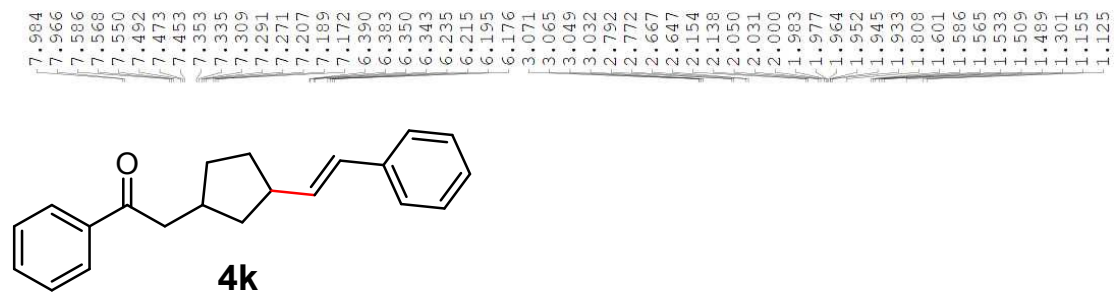

$^1\text{H NMR}$  (400 MHz,  $\text{CDCl}_3$ )

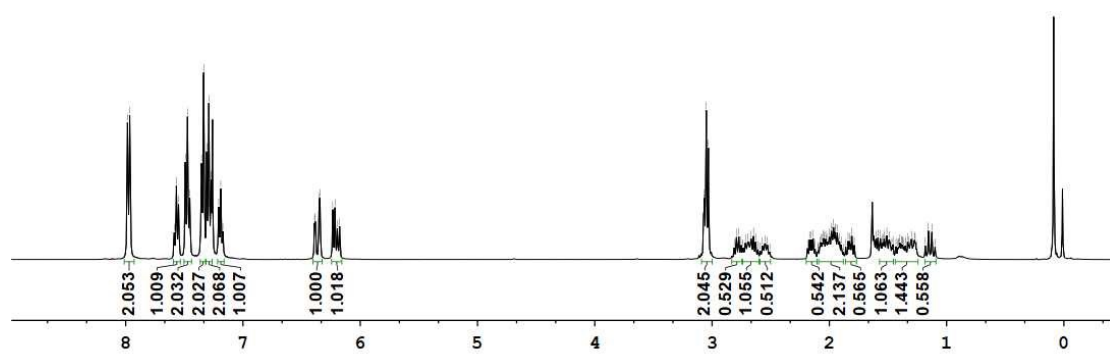

-200.0  
137.7  
137.1  
135.3  
135.1  
132.9  
128.5  
128.4  
128.1  
128.0  
126.8  
125.9  
45.3  
45.0  
43.5  
42.3  
40.6  
38.9  
35.8  
34.7  
33.3  
32.9  
31.9  
31.7

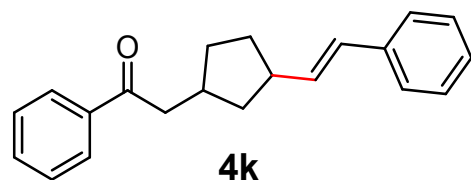

$^{13}\text{C}\{^1\text{H}\}$  NMR (100 MHz,  $\text{CDCl}_3$ )

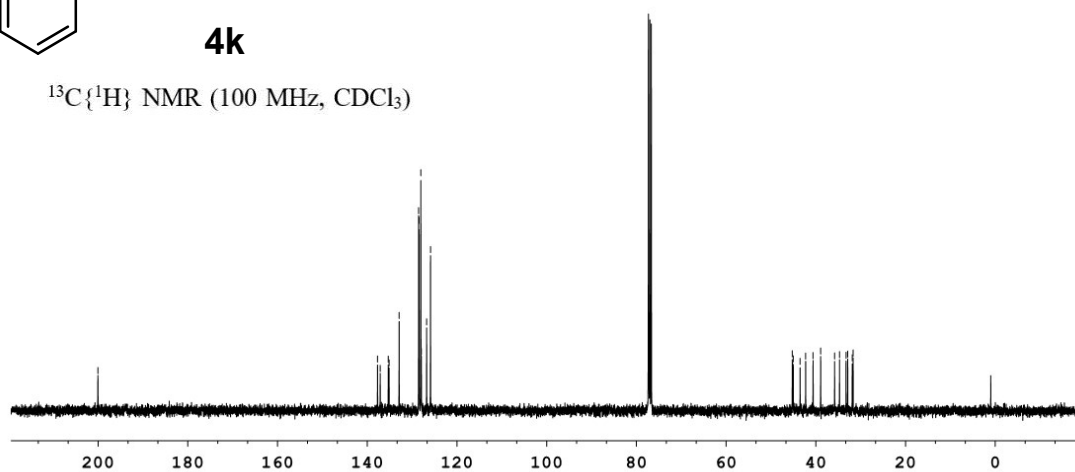

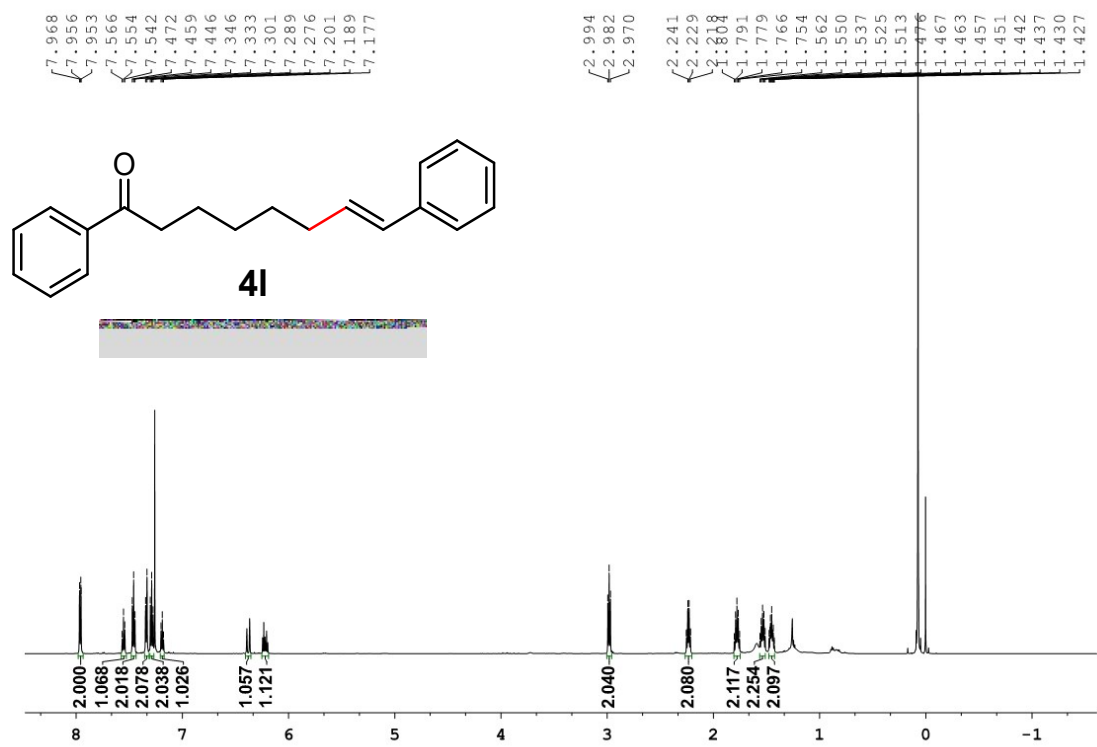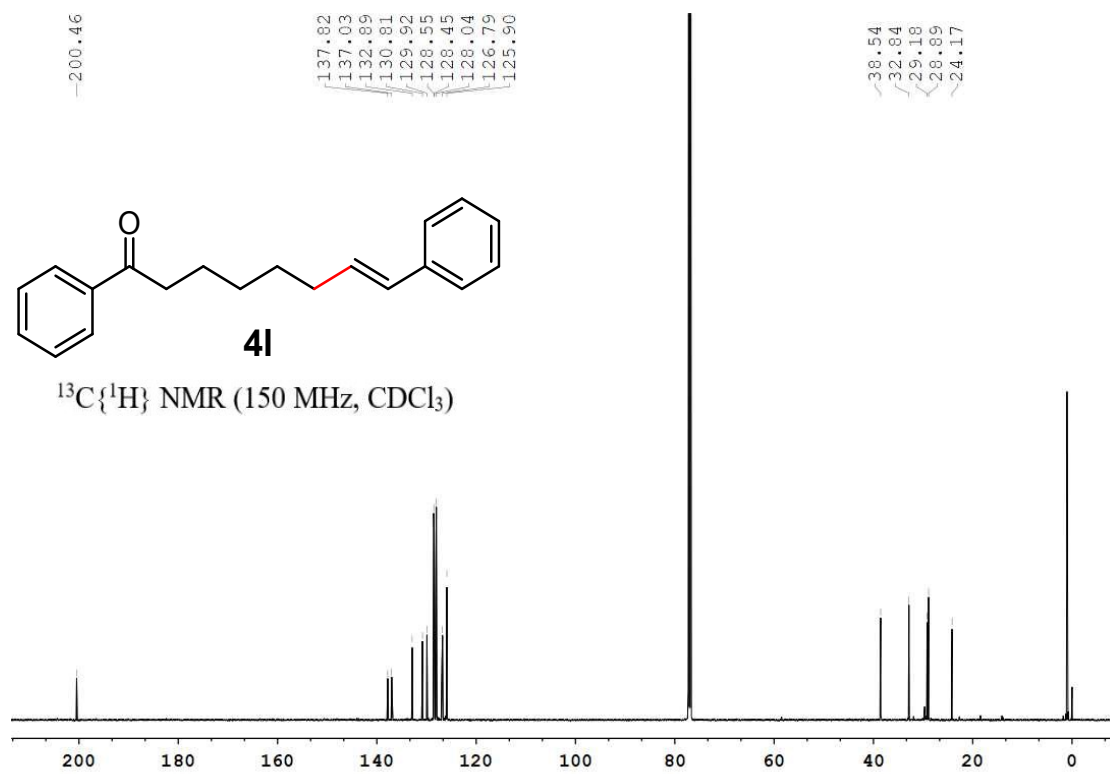

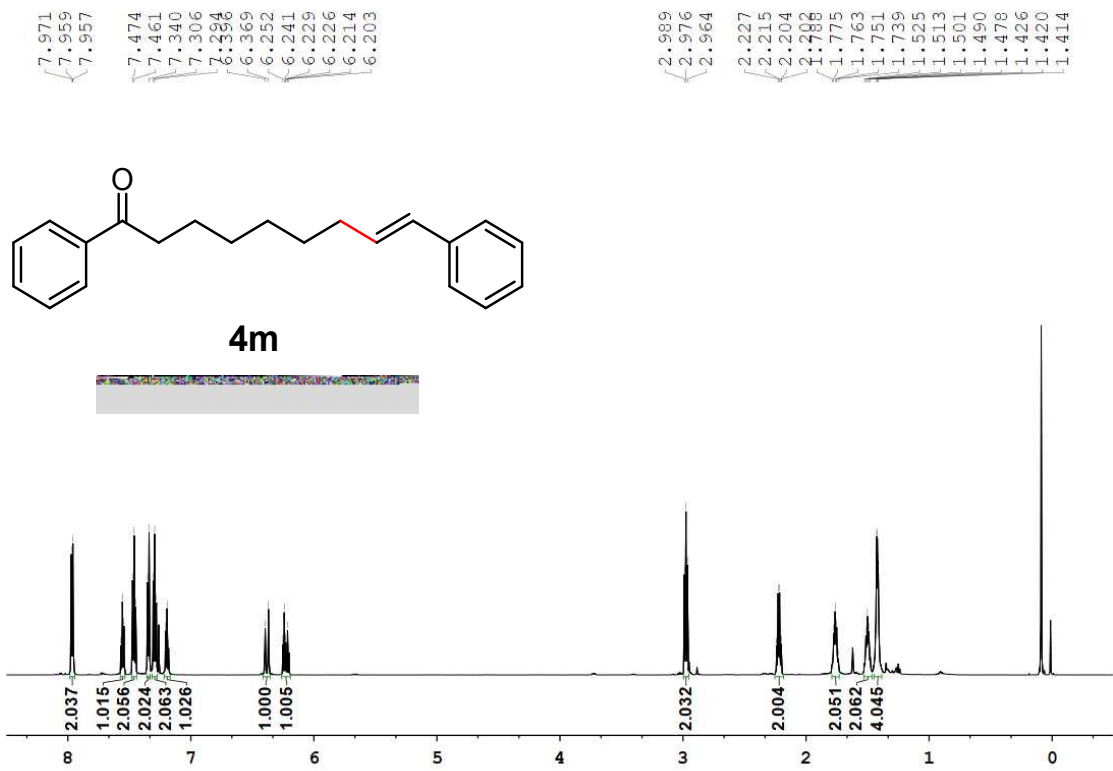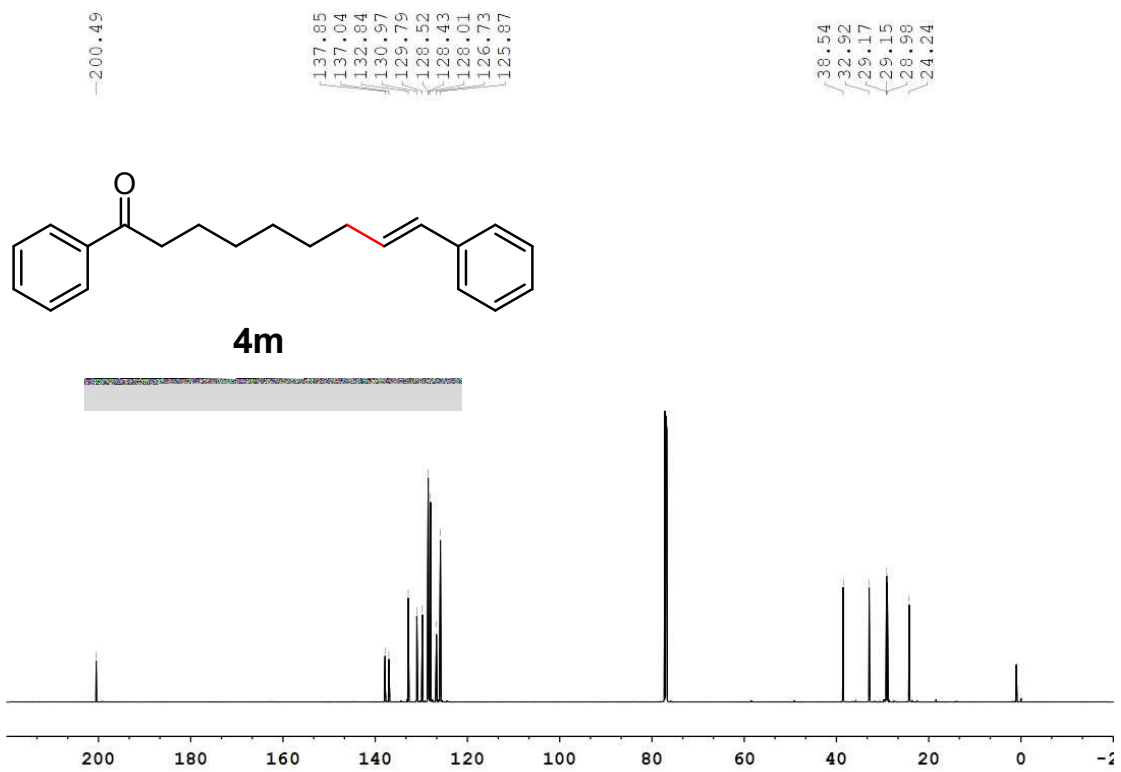

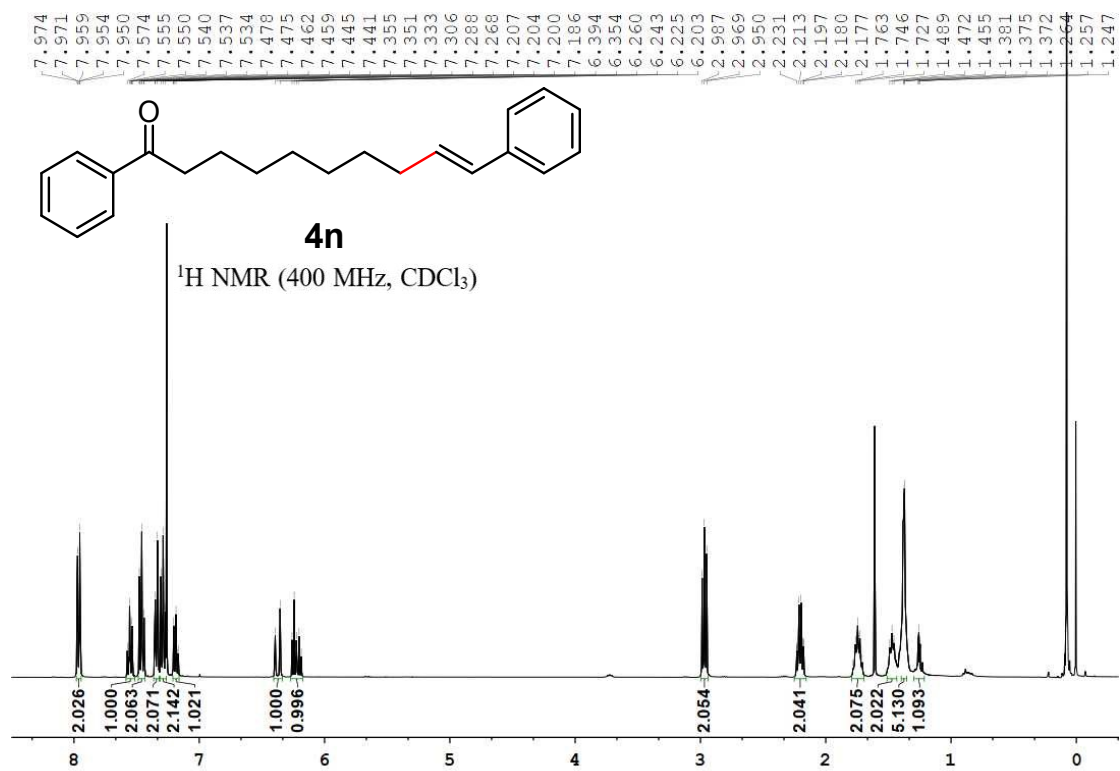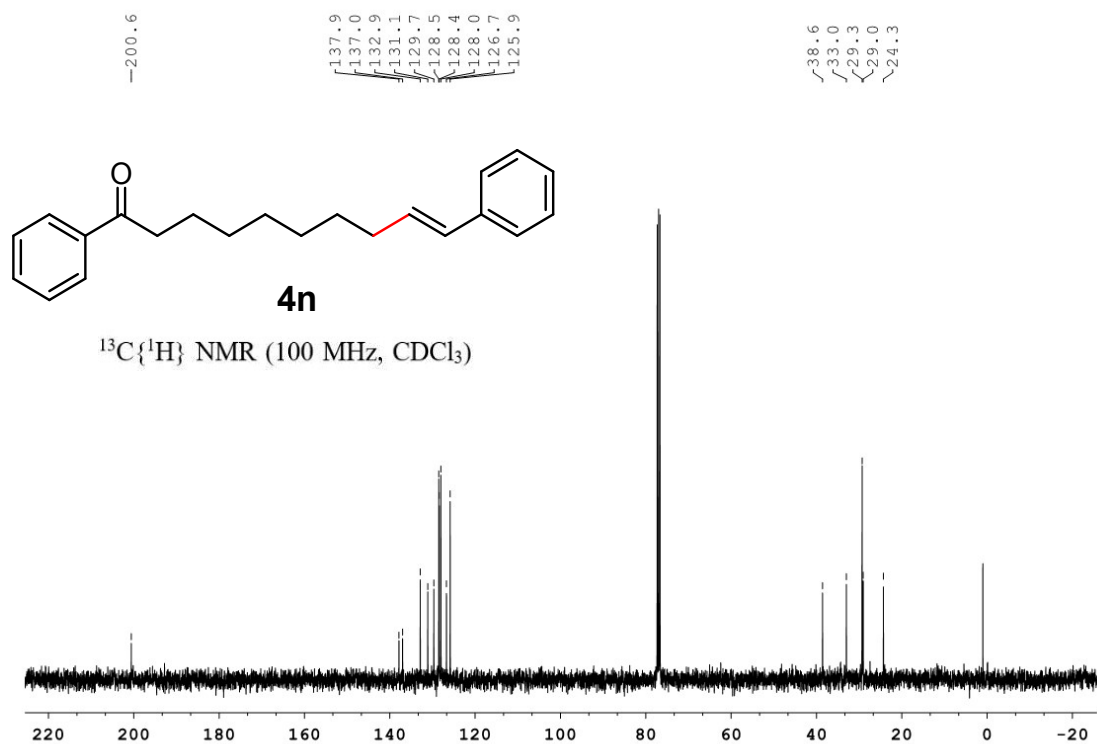

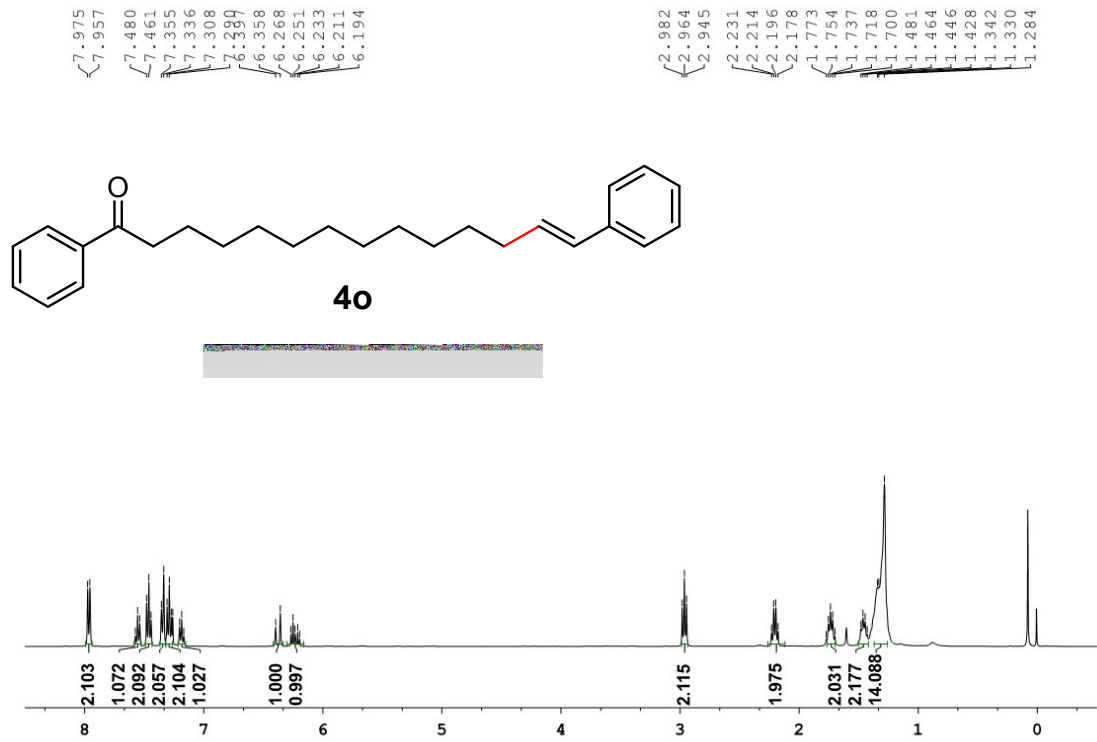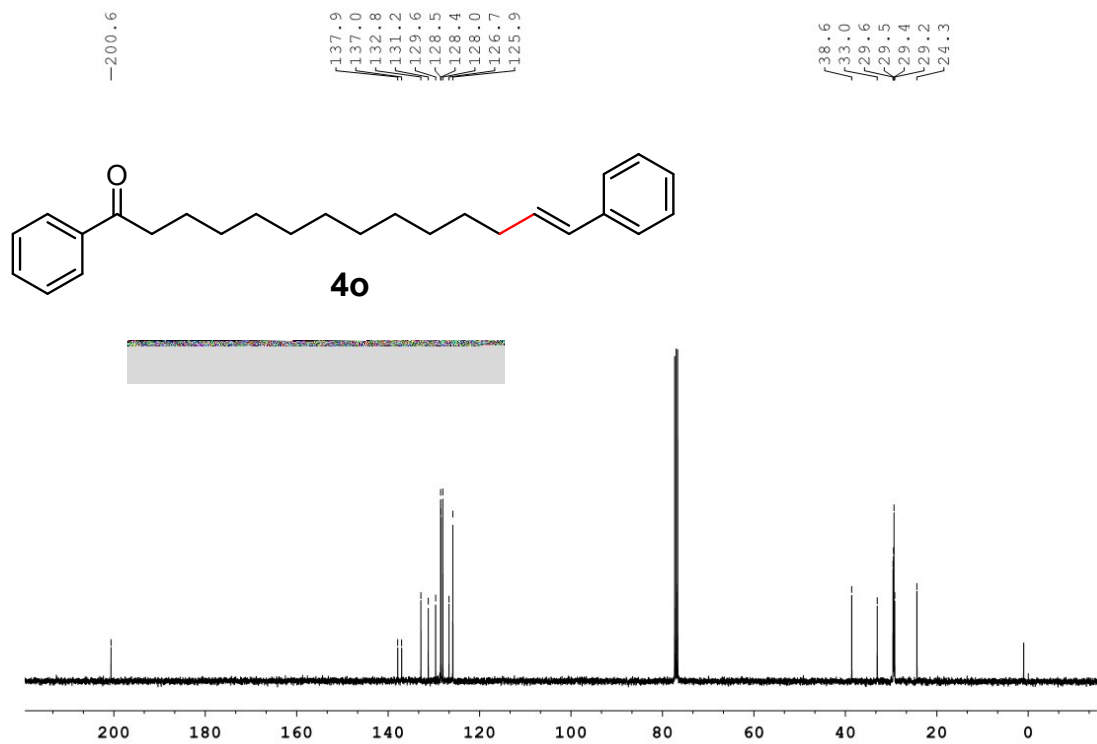

# $^1\text{H}$ NMR and $^{13}\text{C}$ NMR Spectra of the Products 5

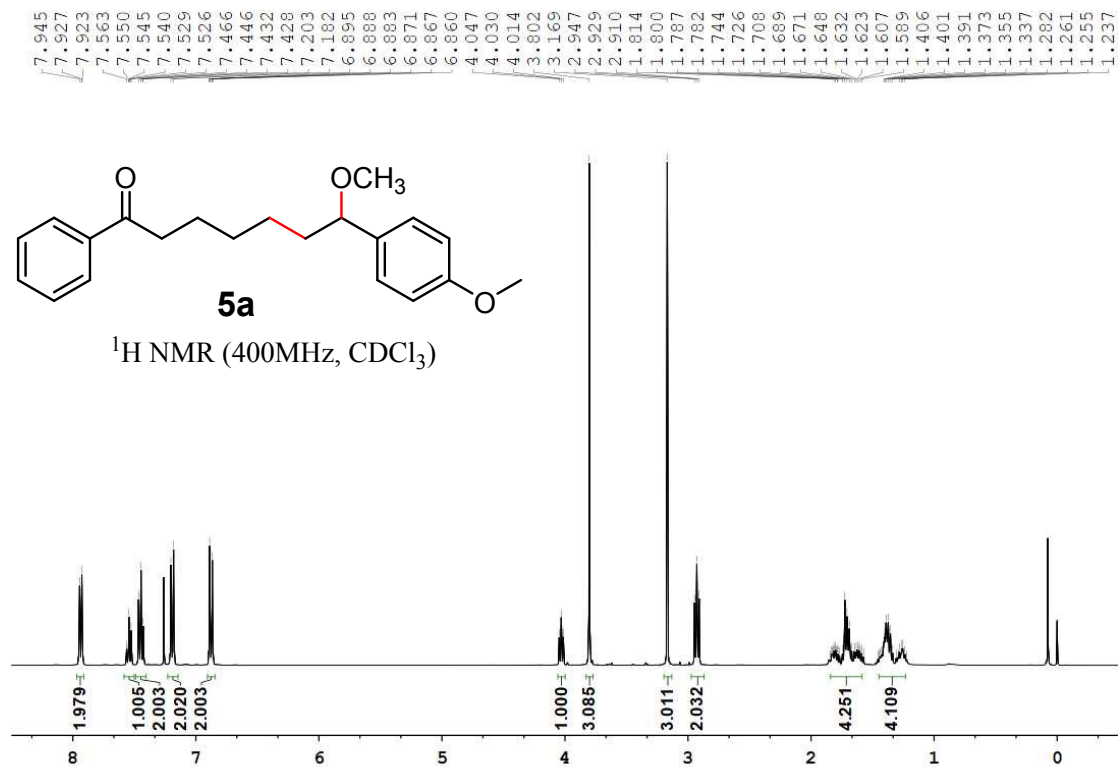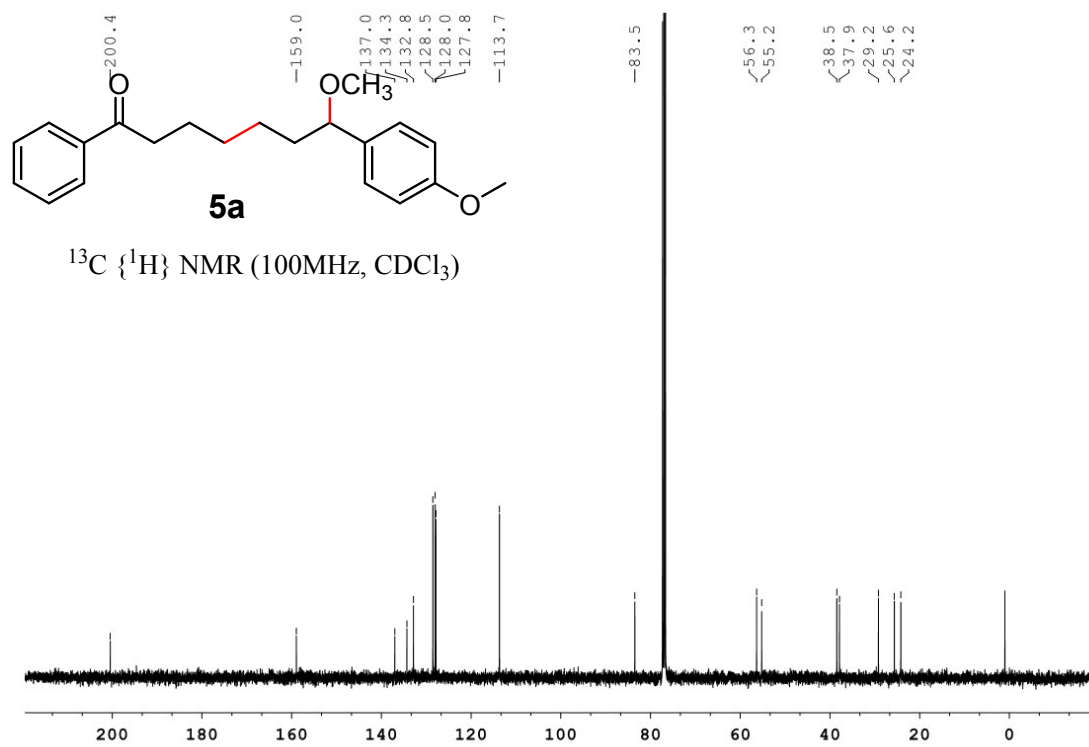



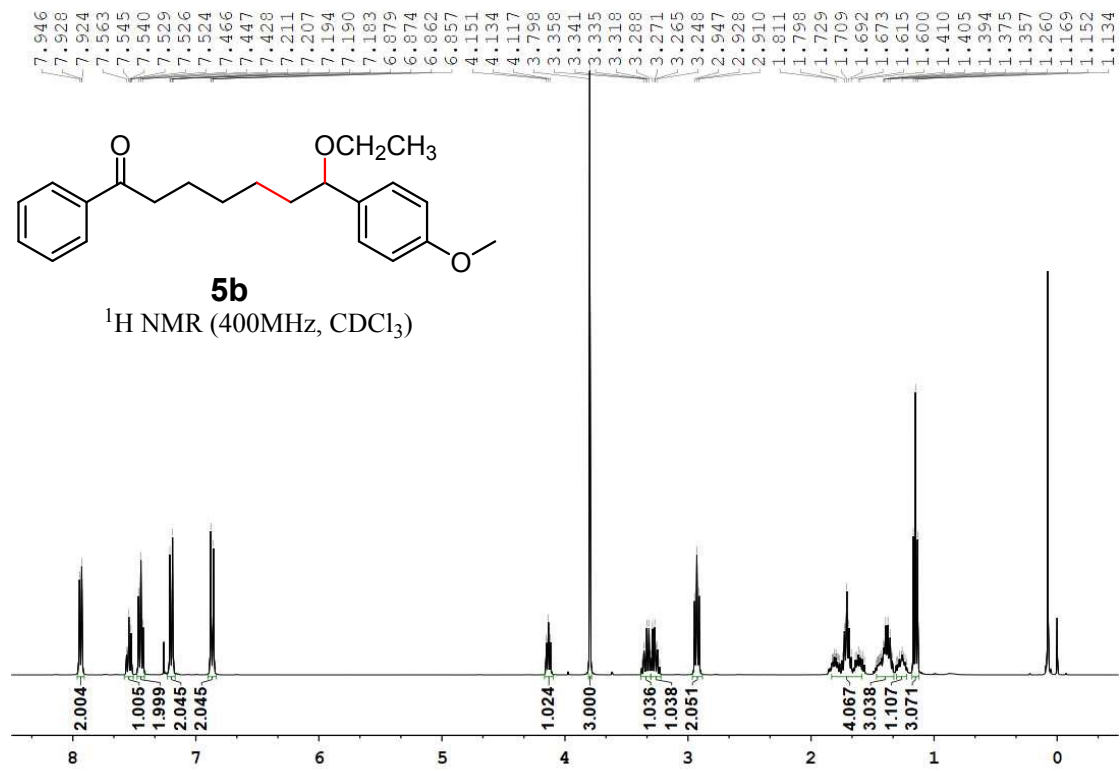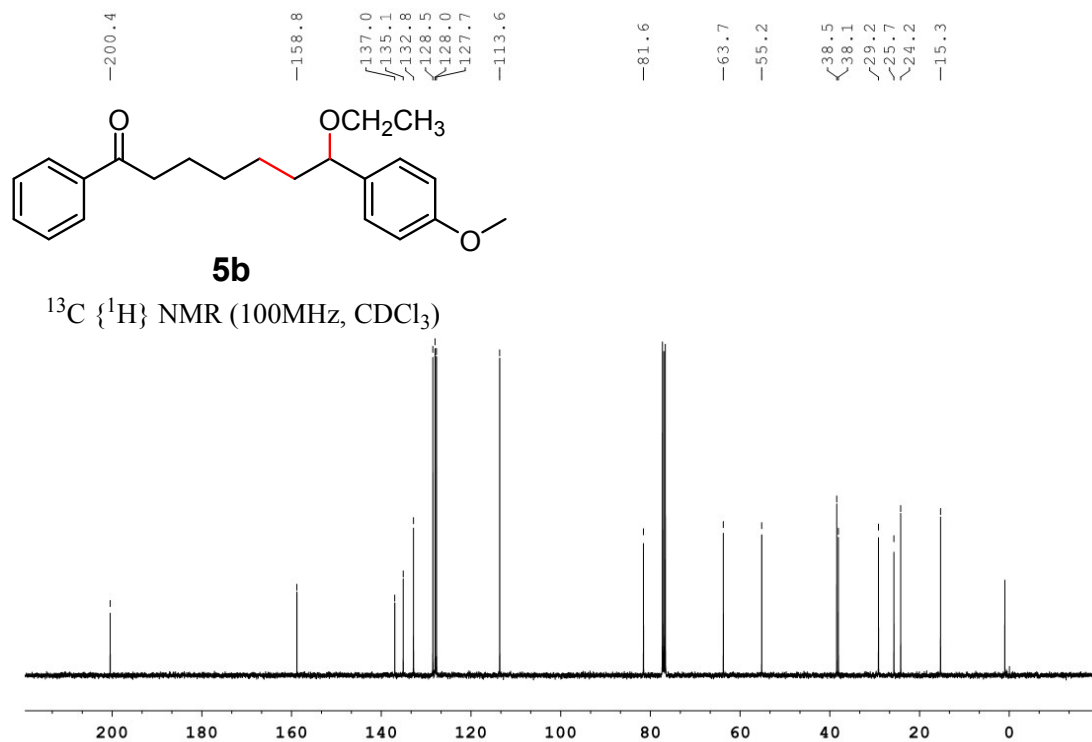

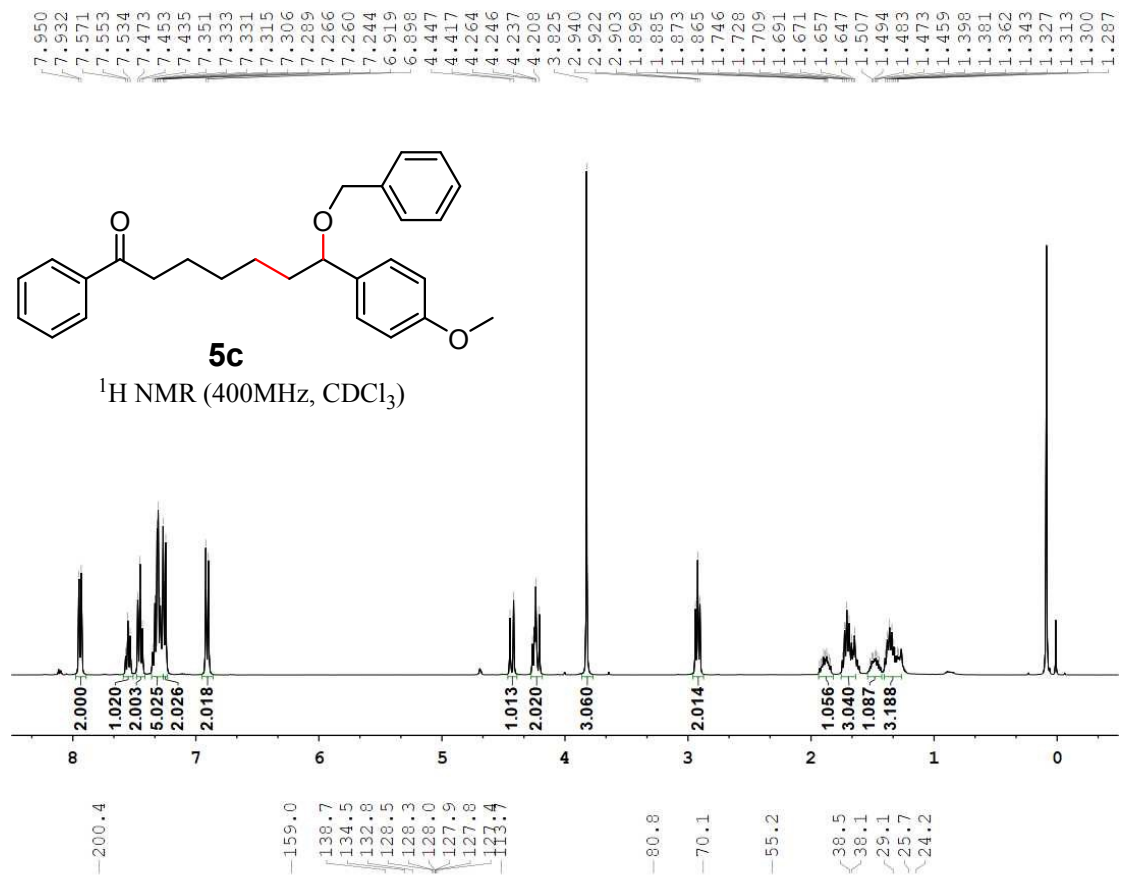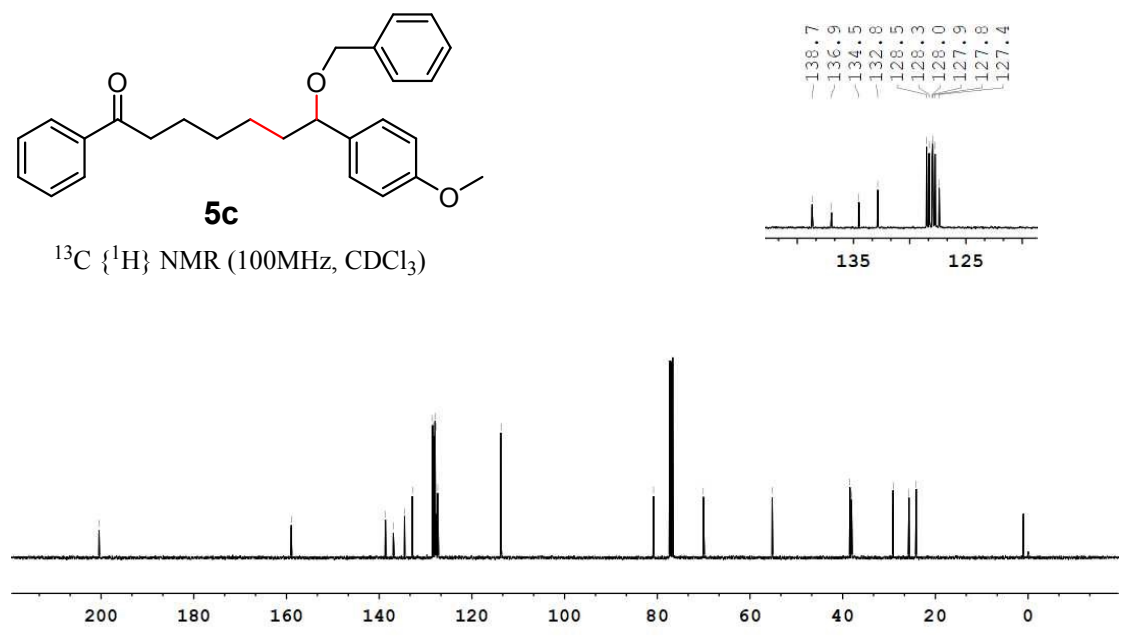

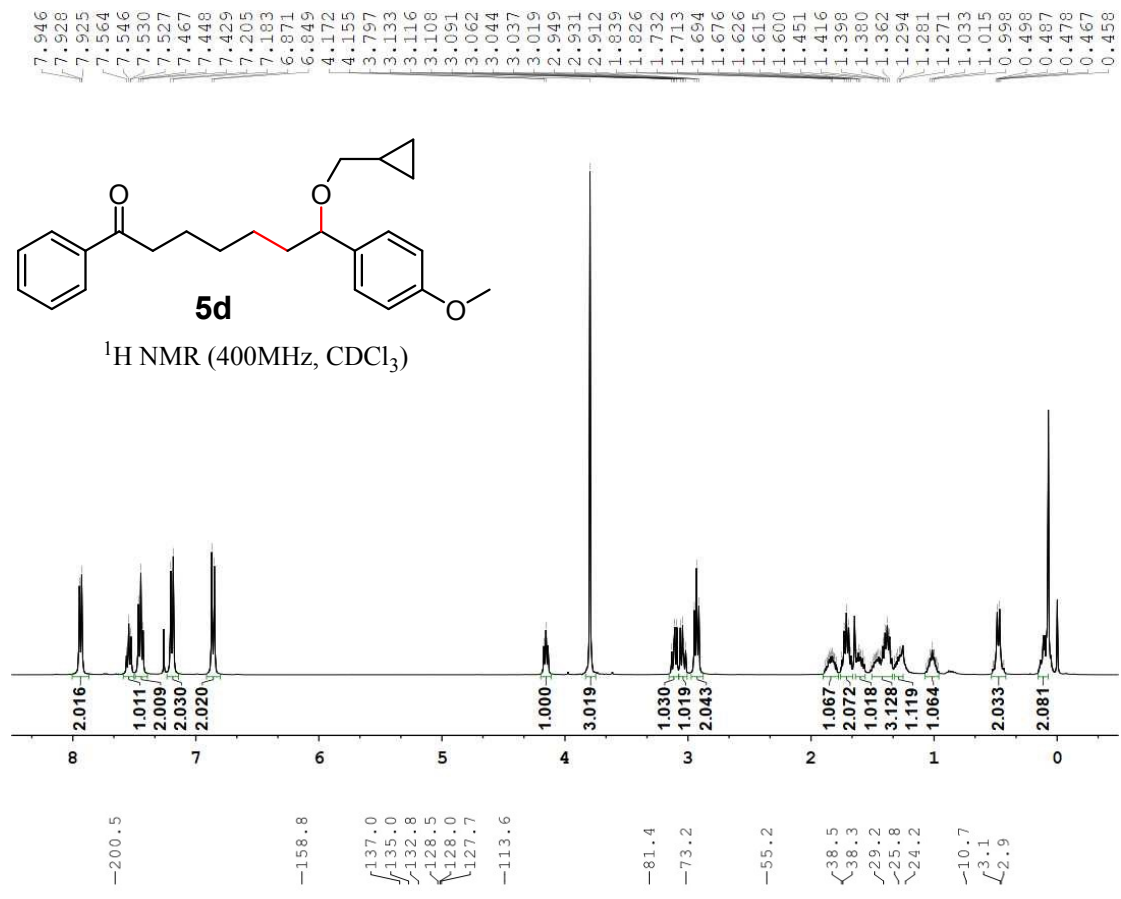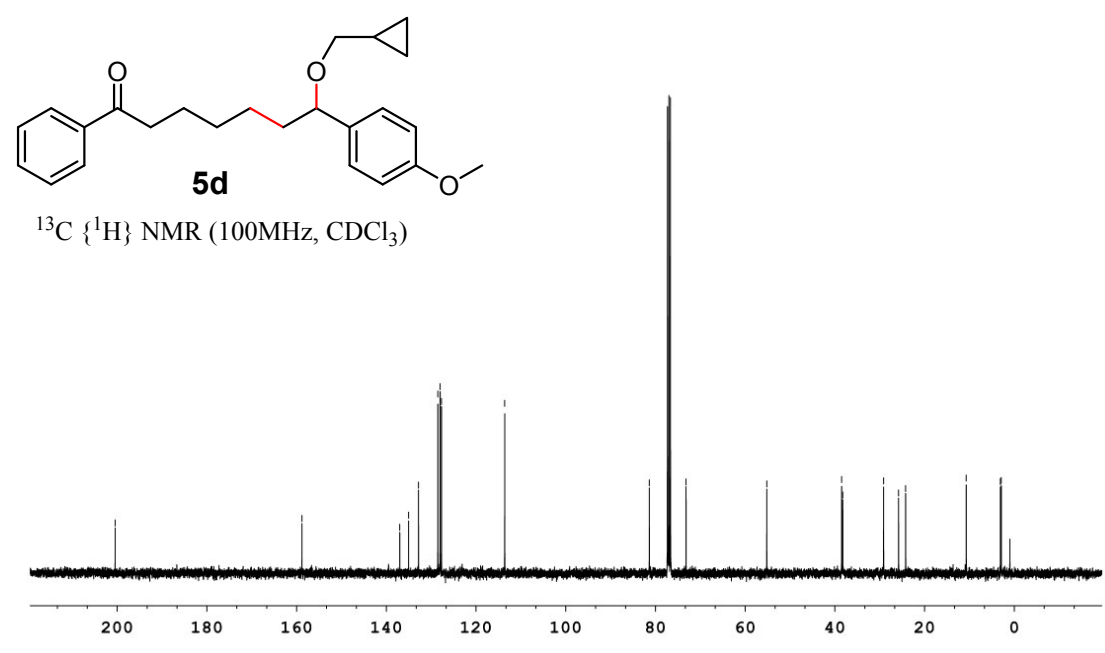

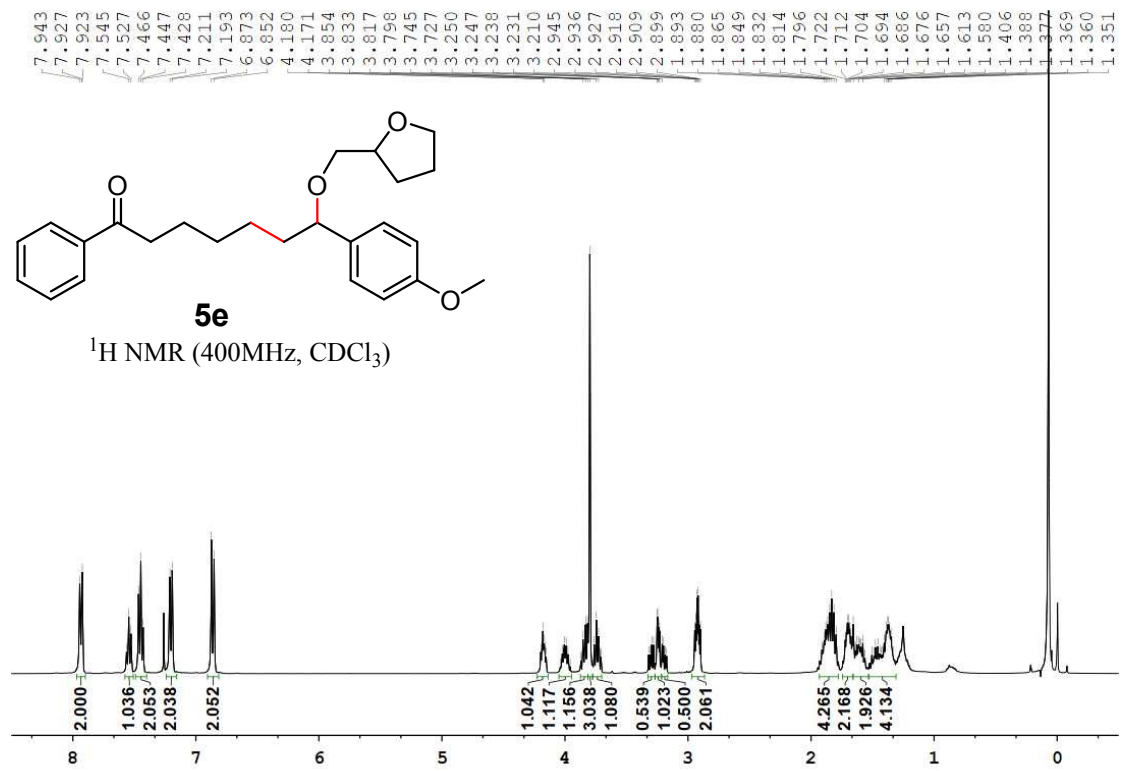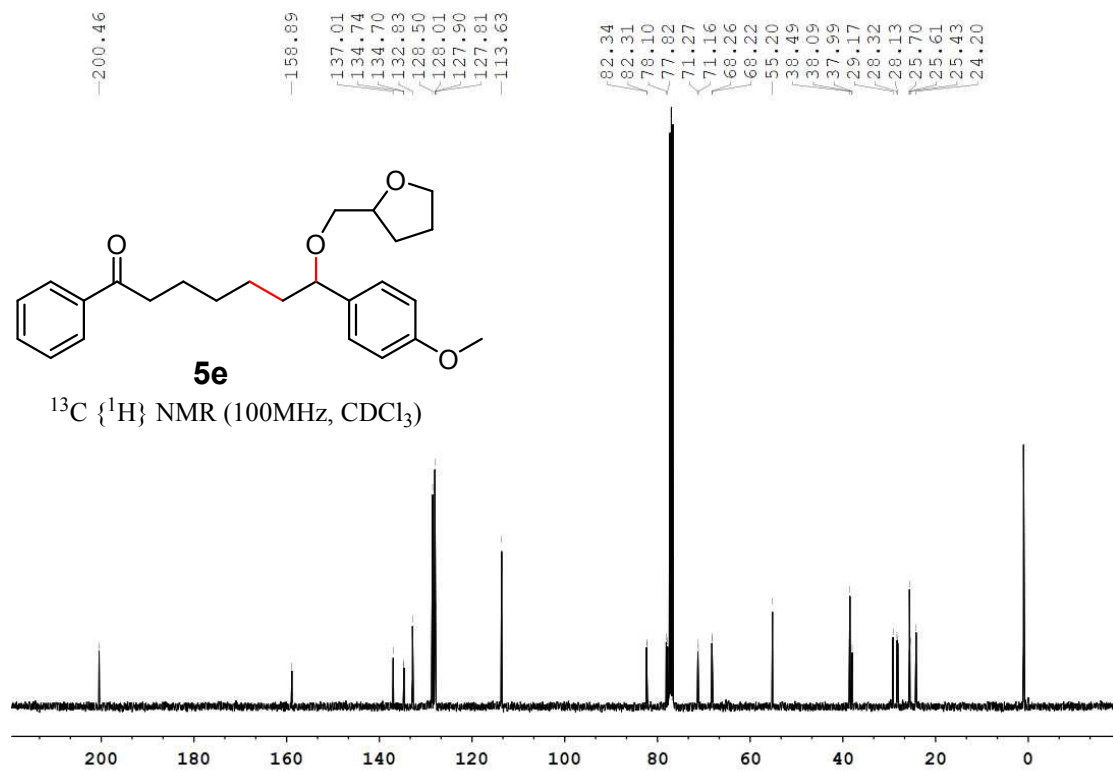

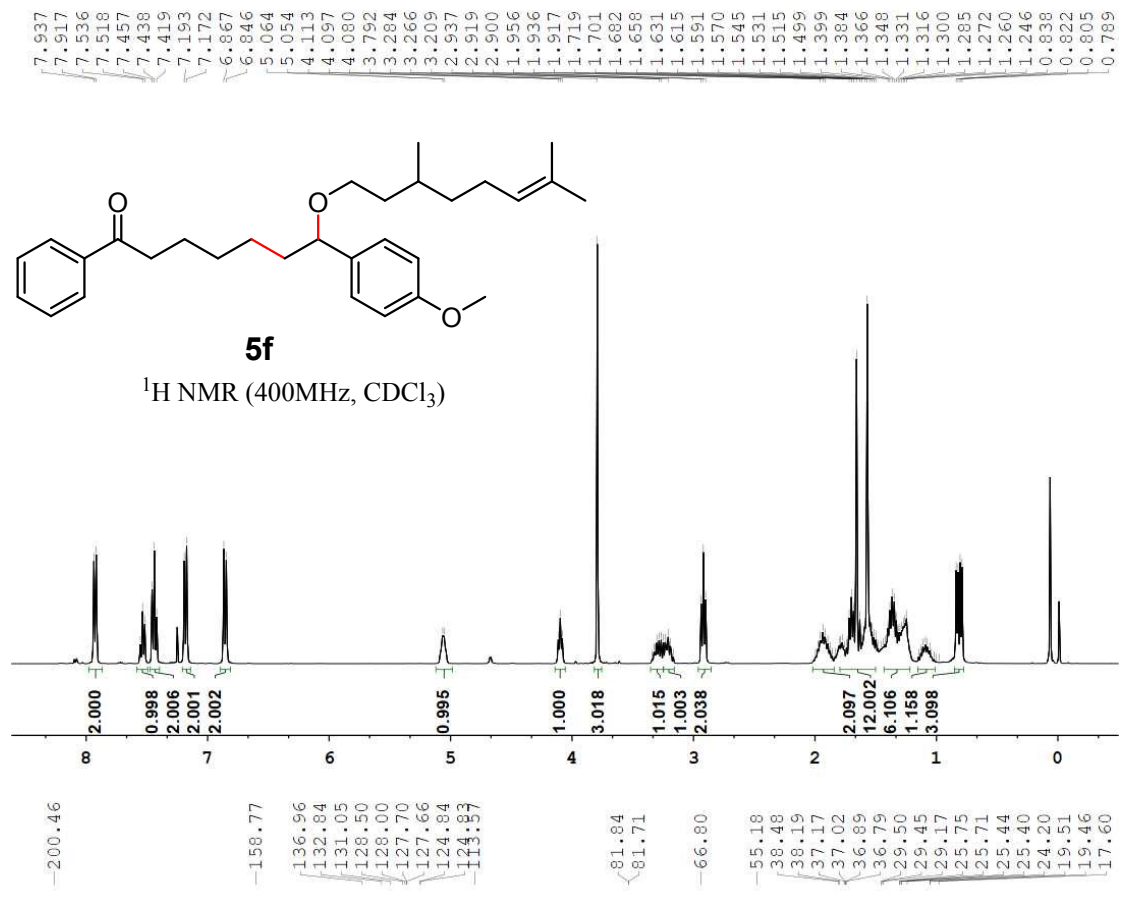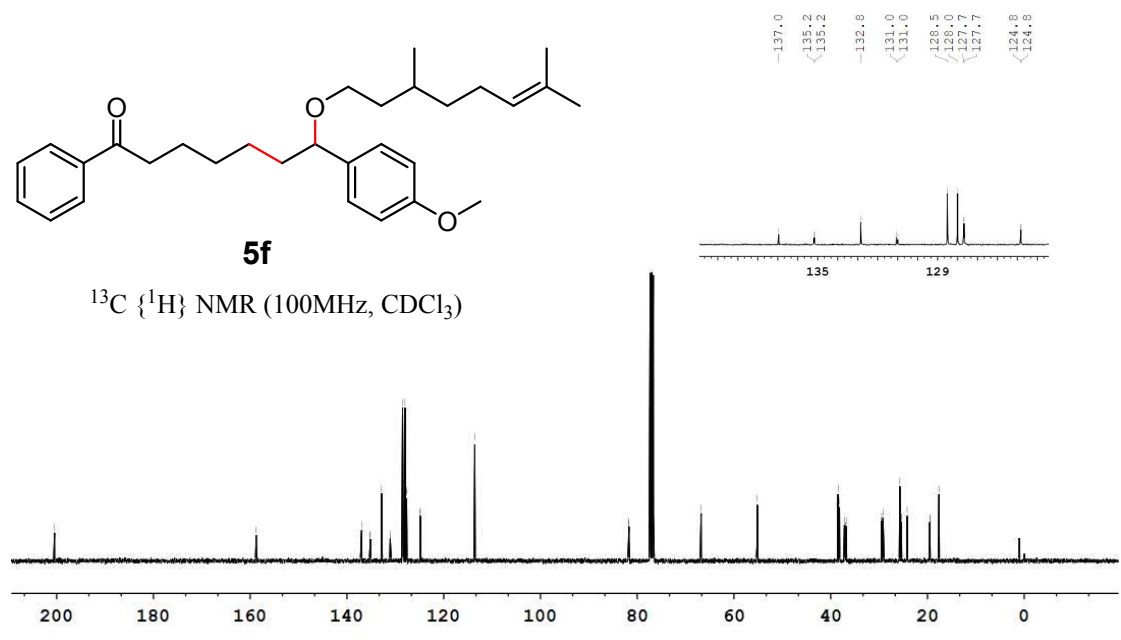

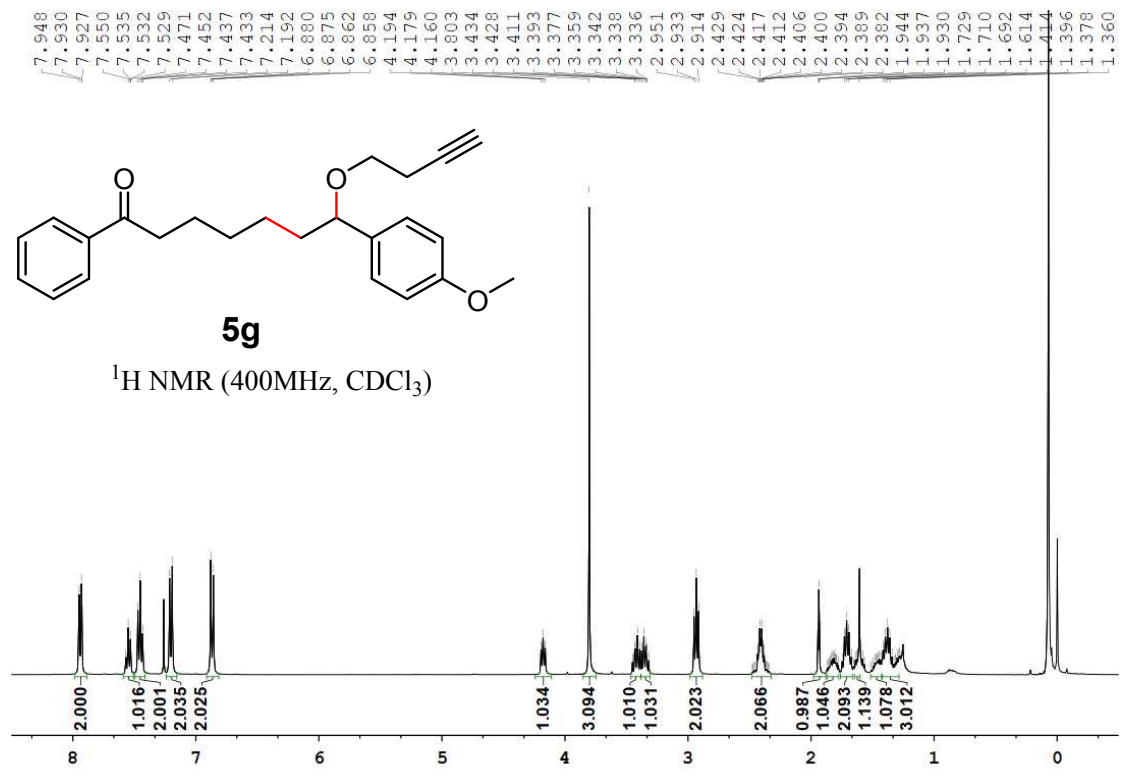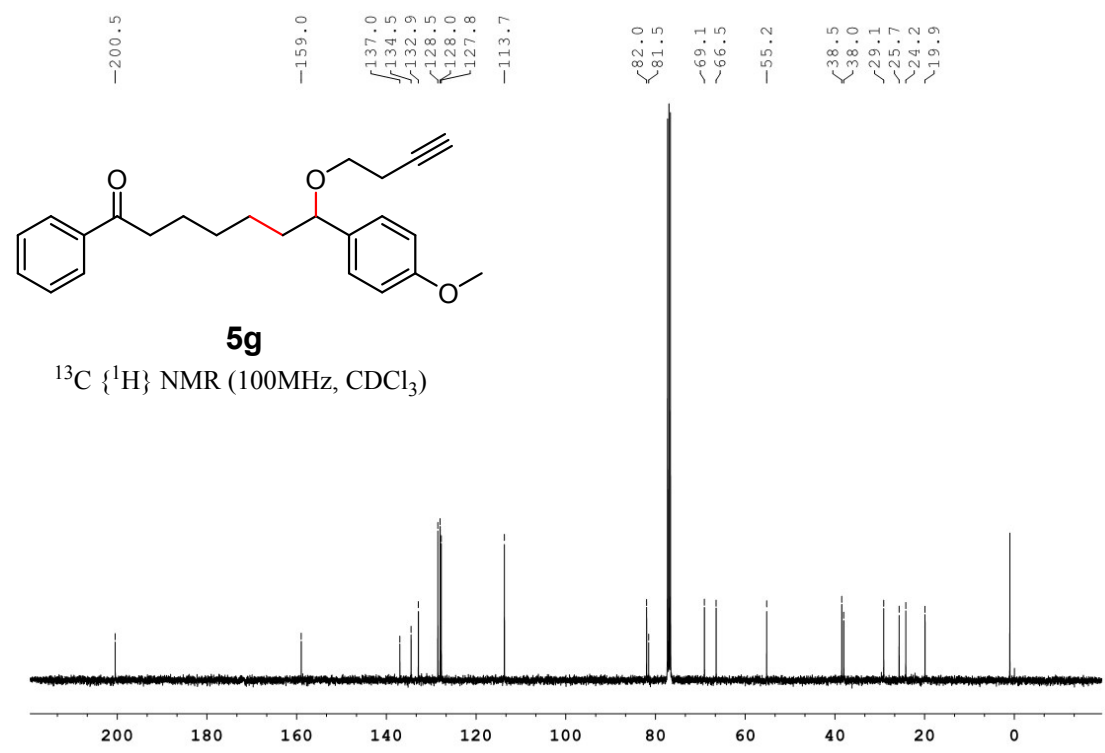

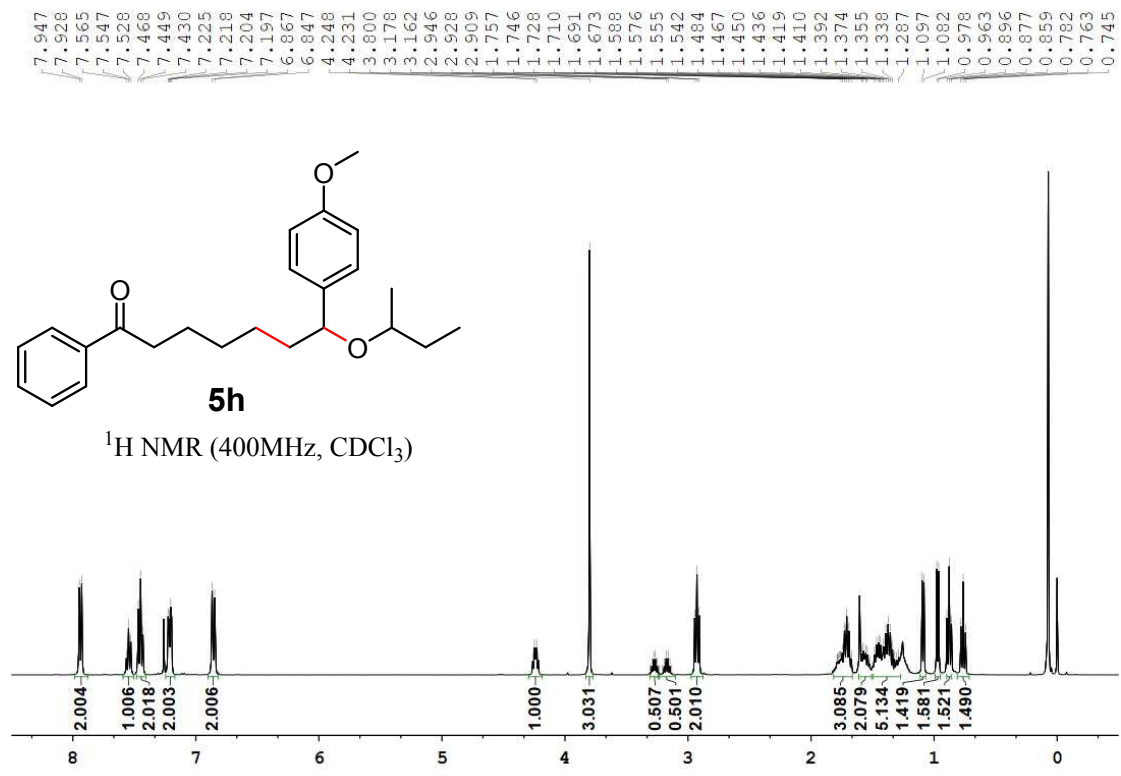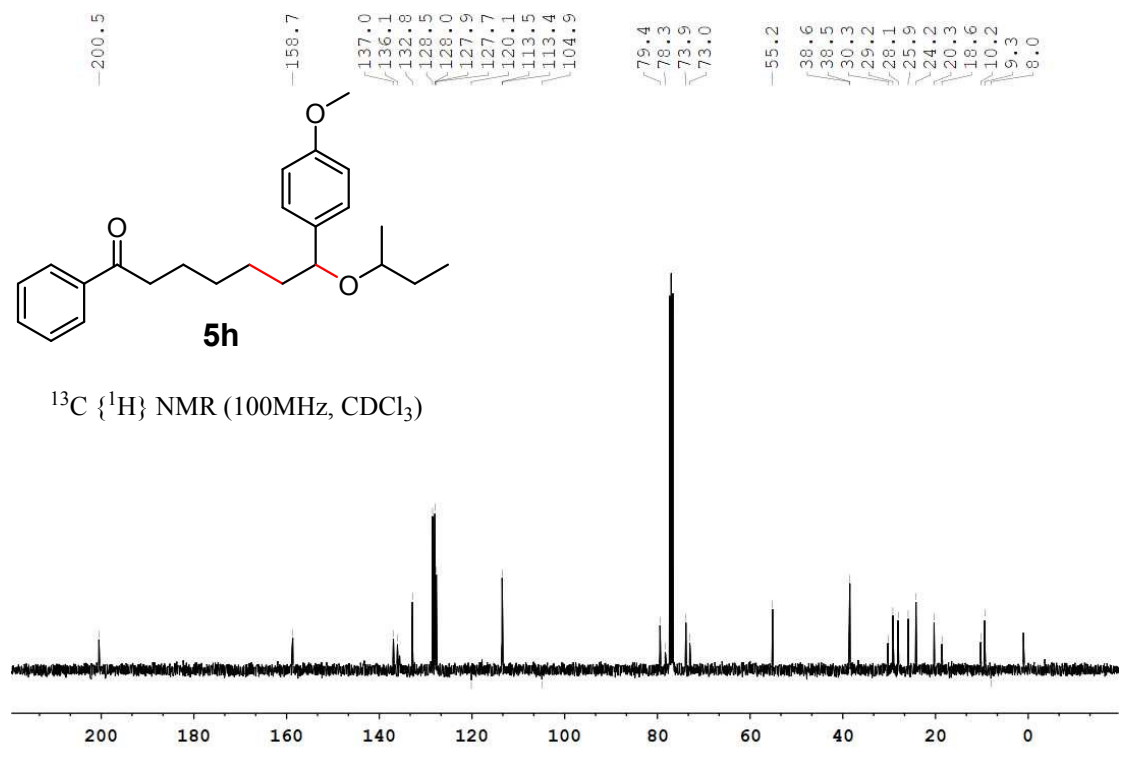

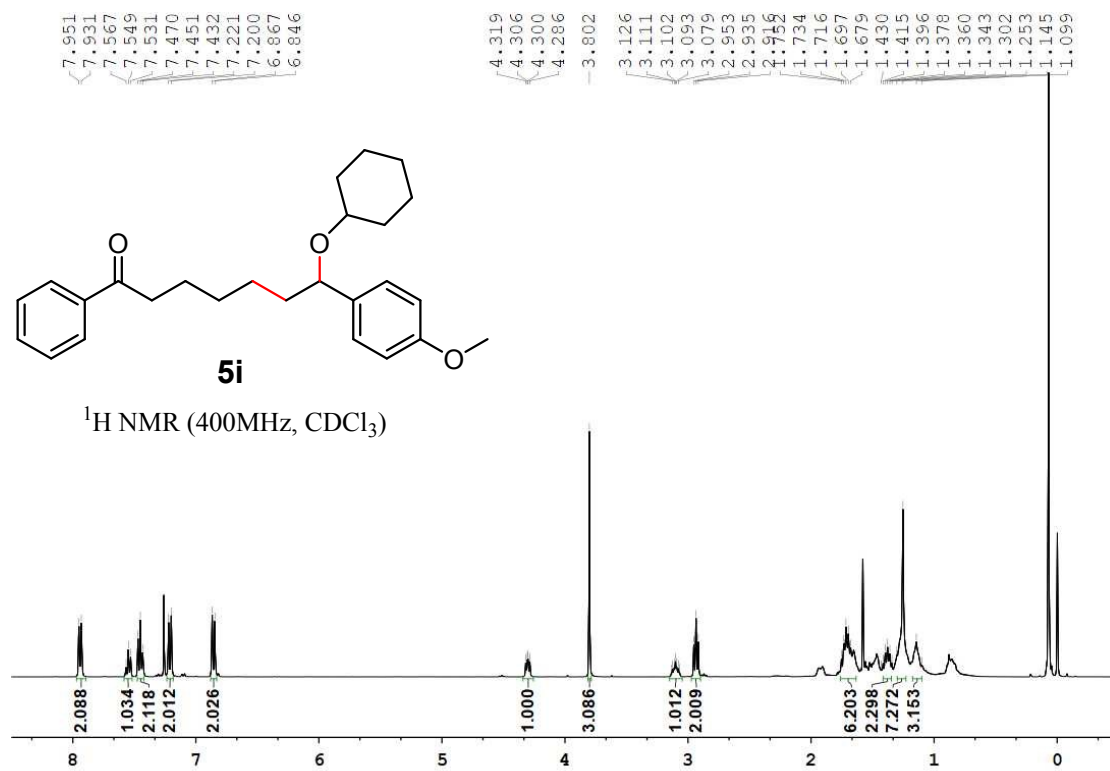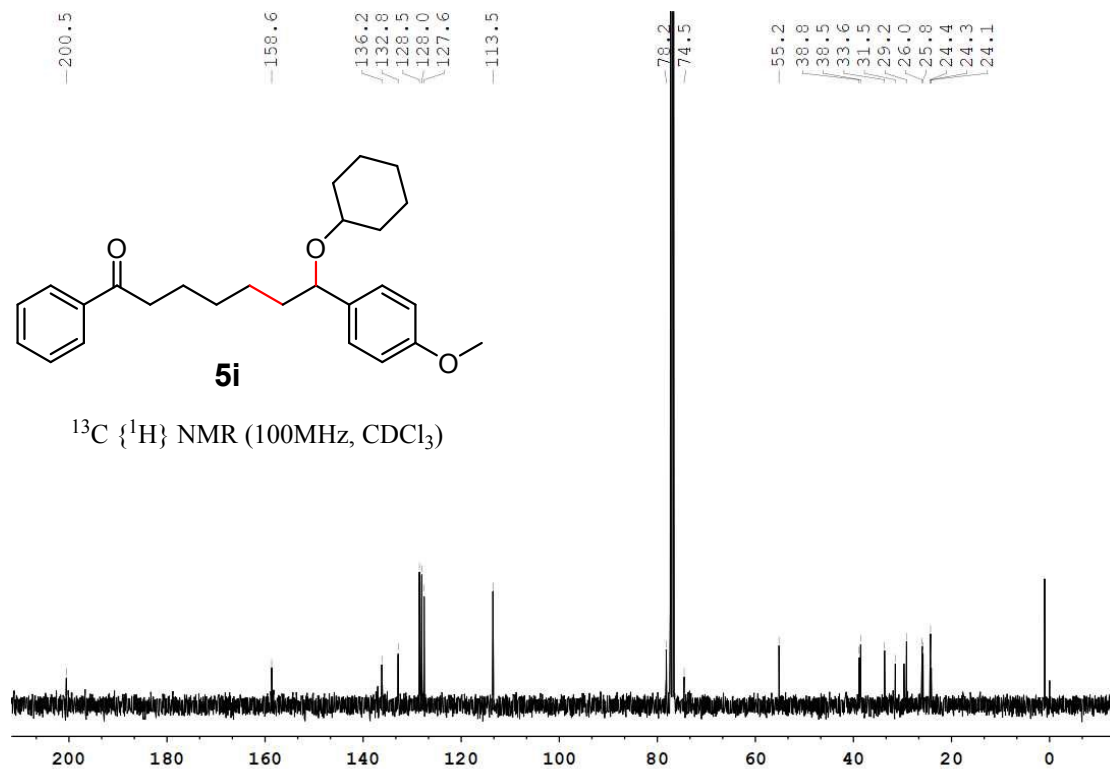



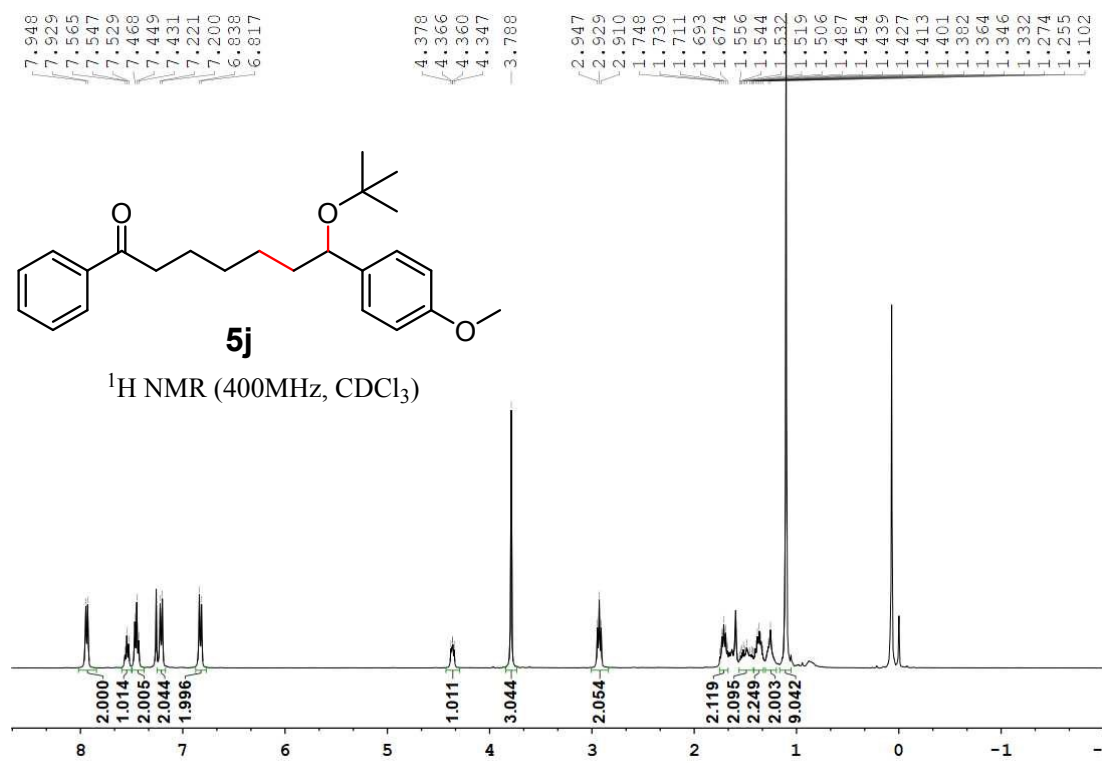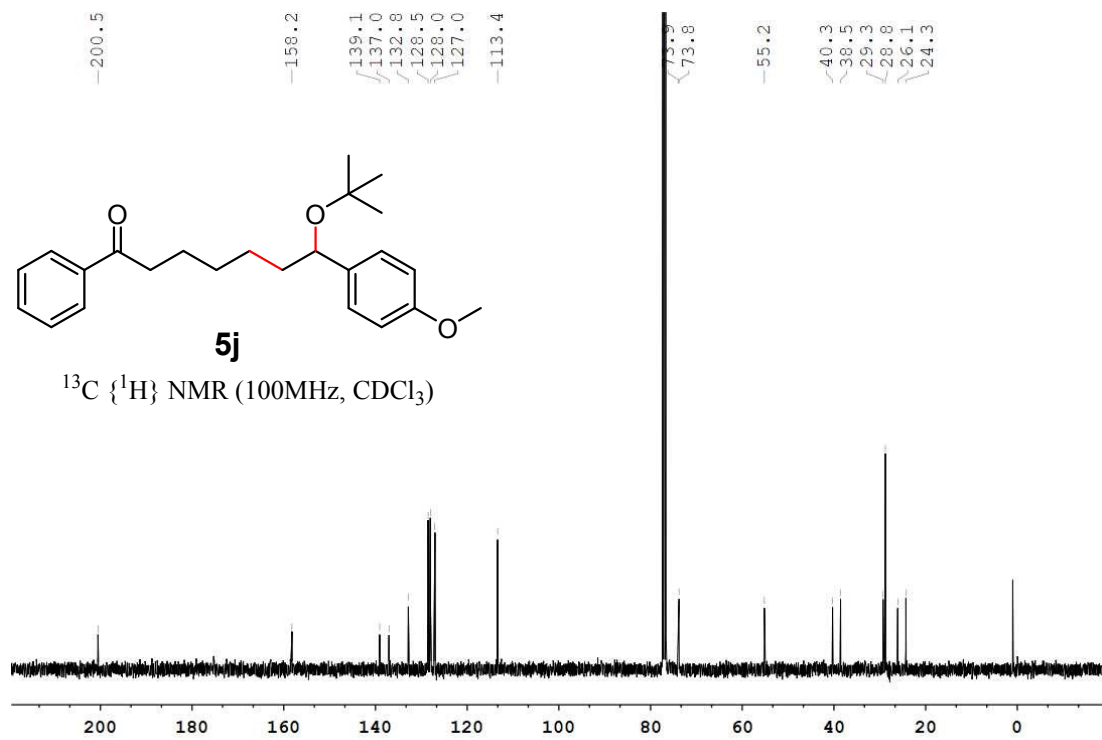

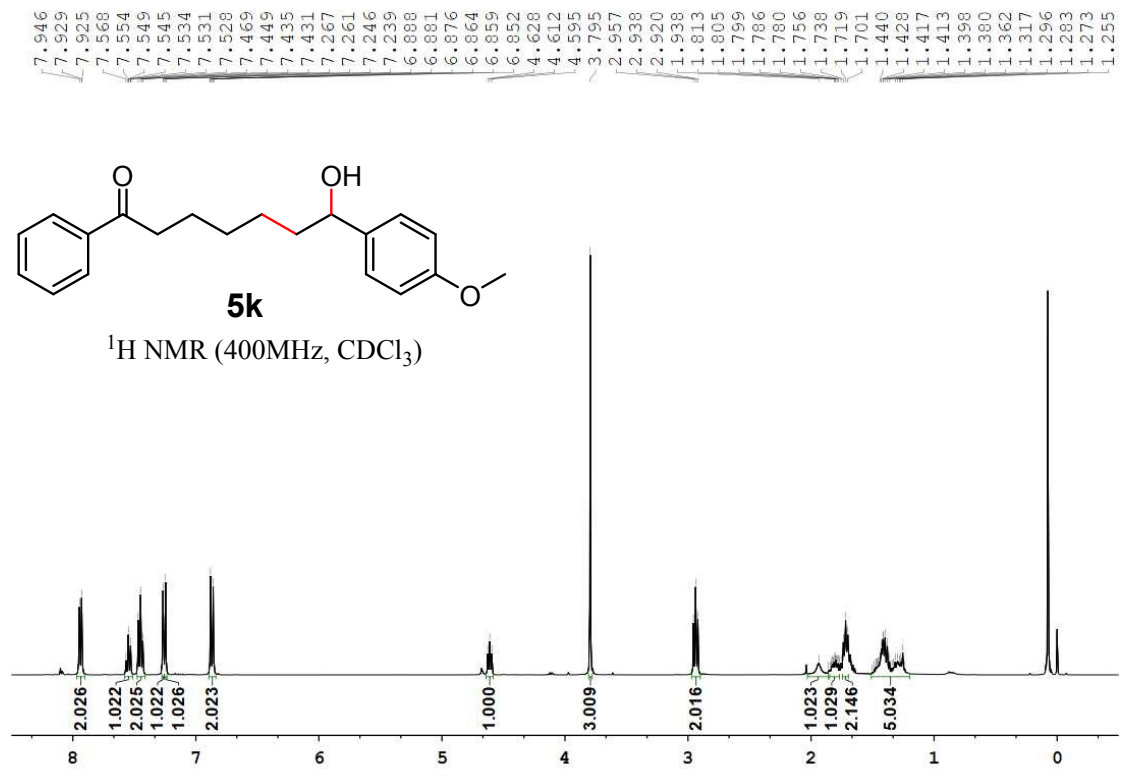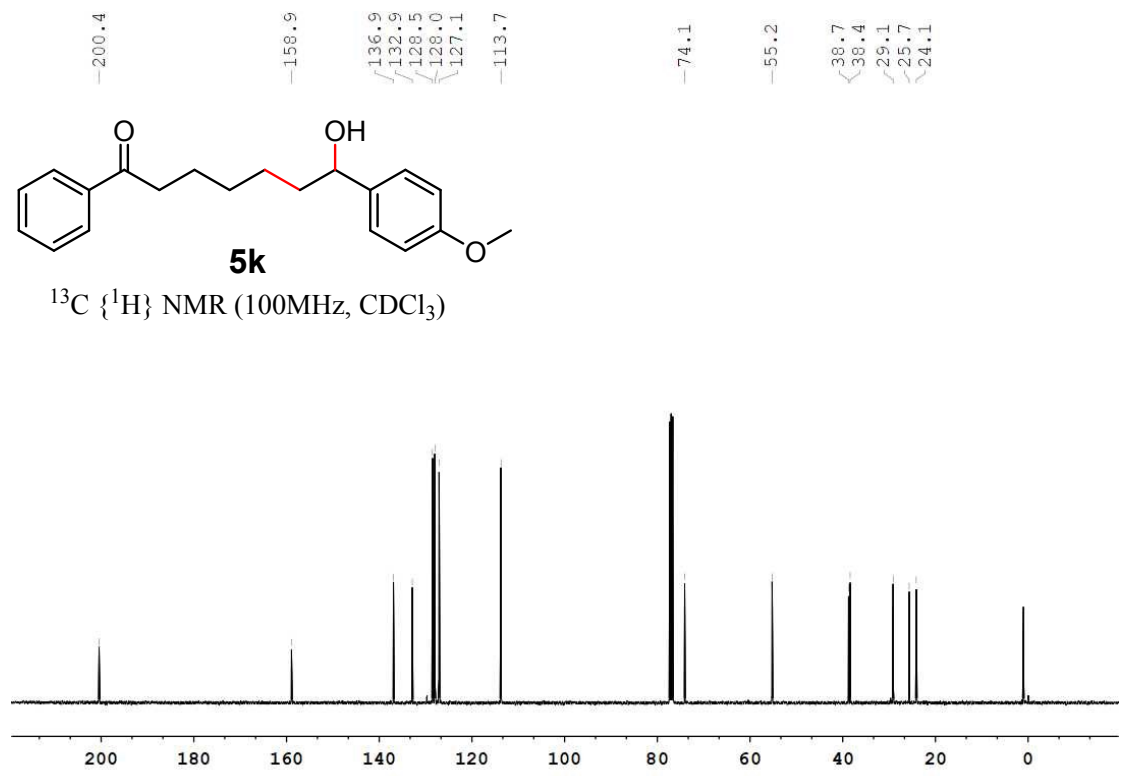

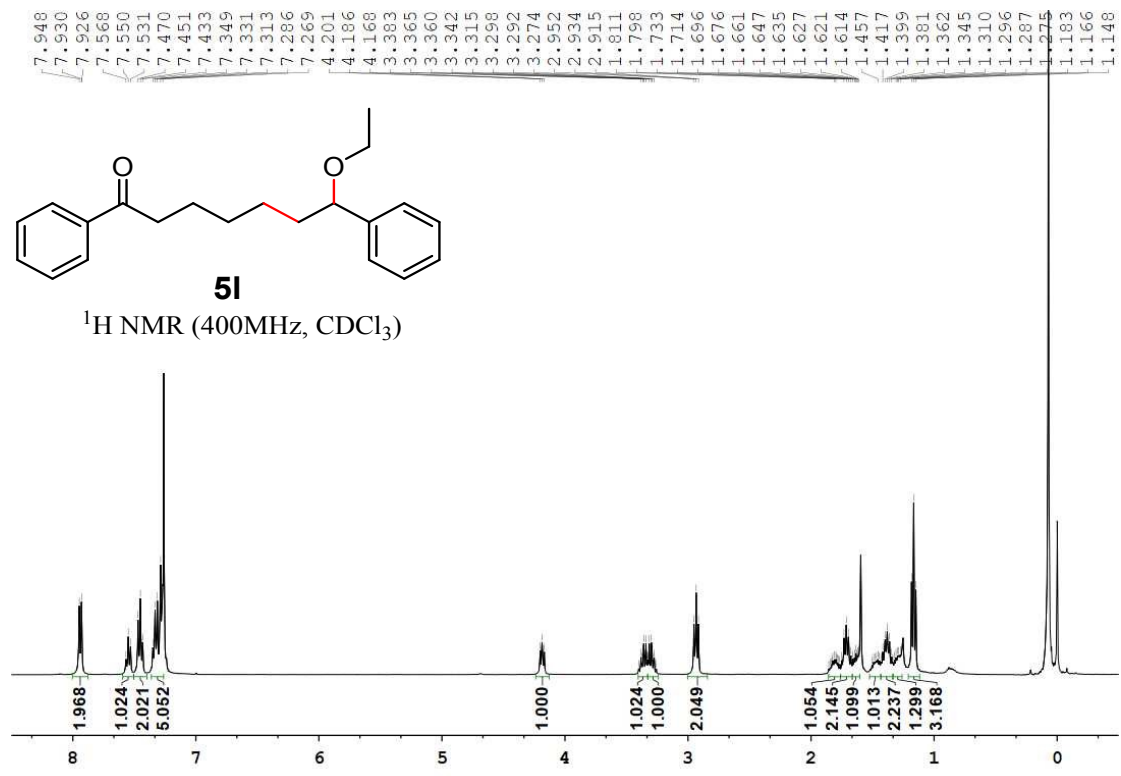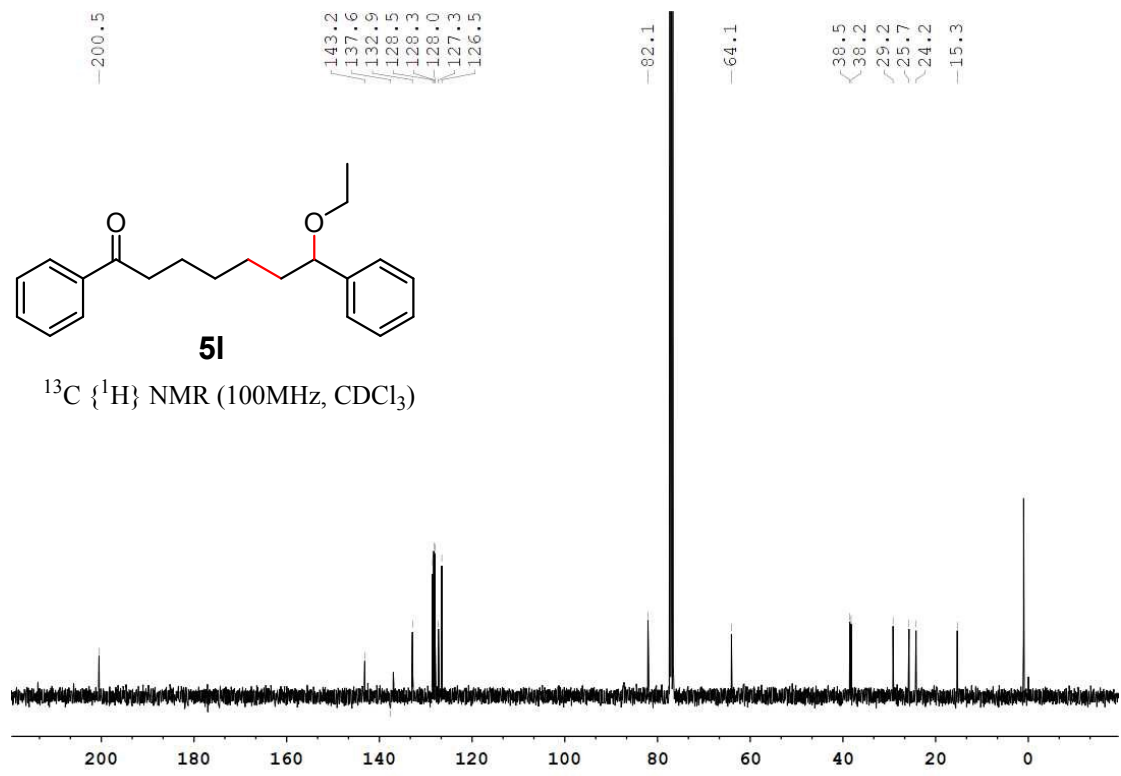

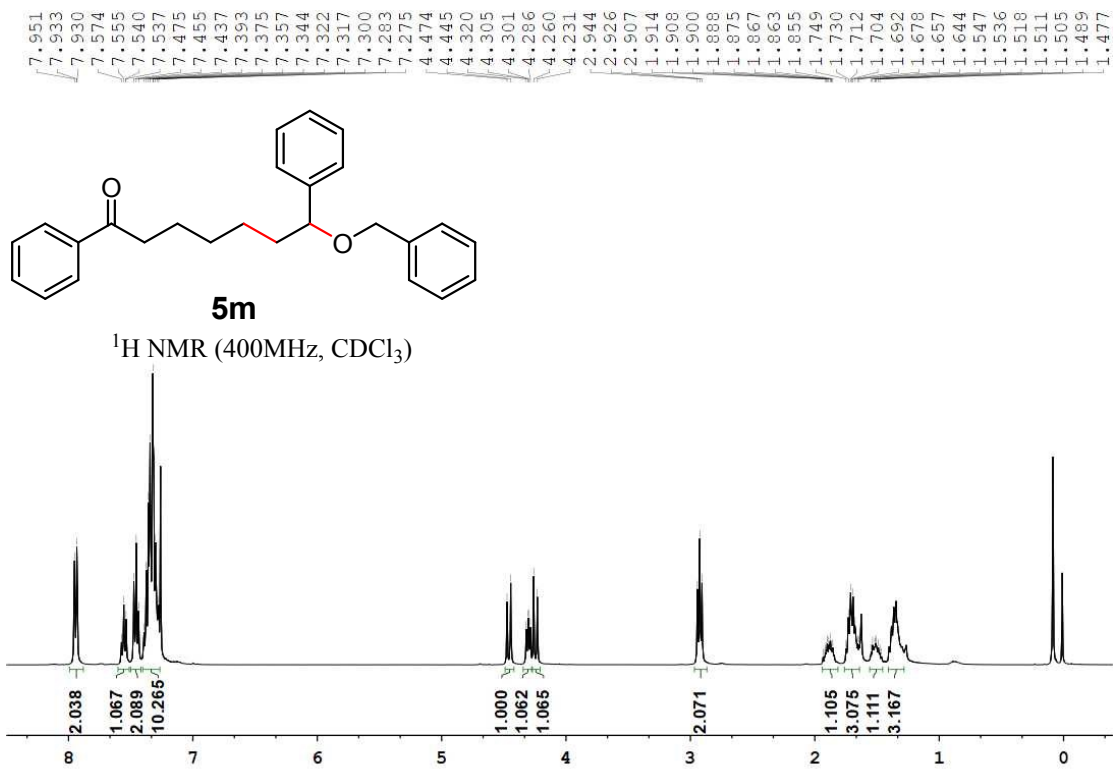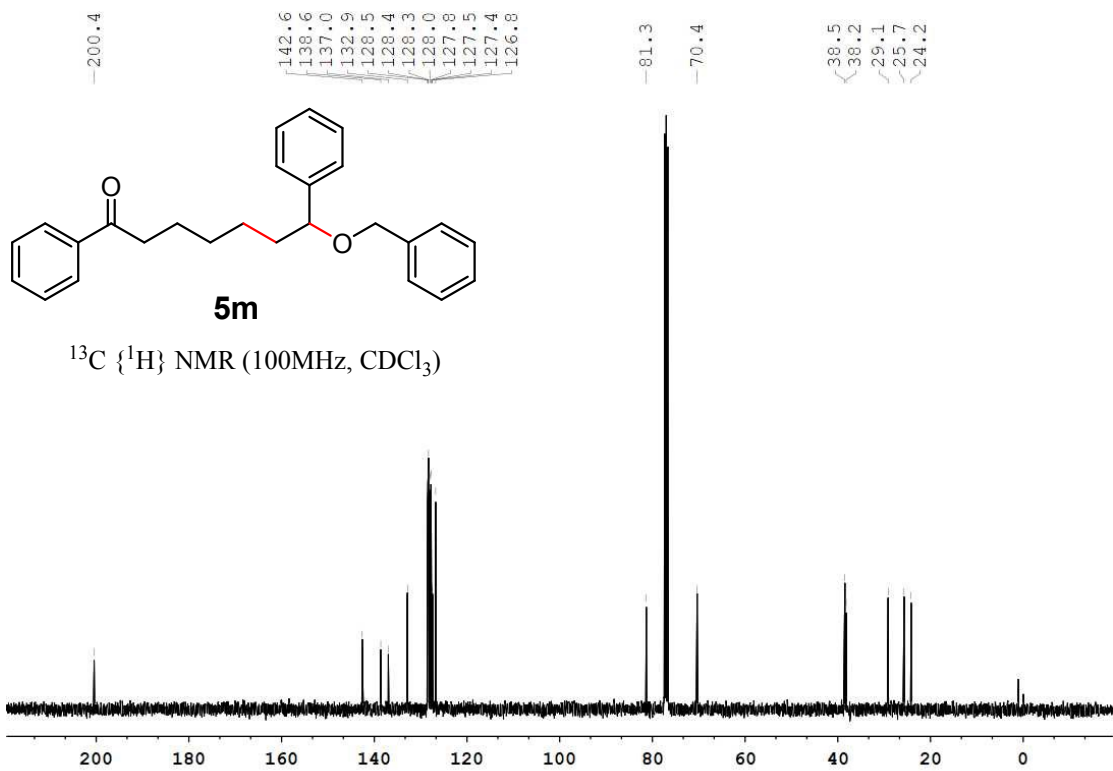

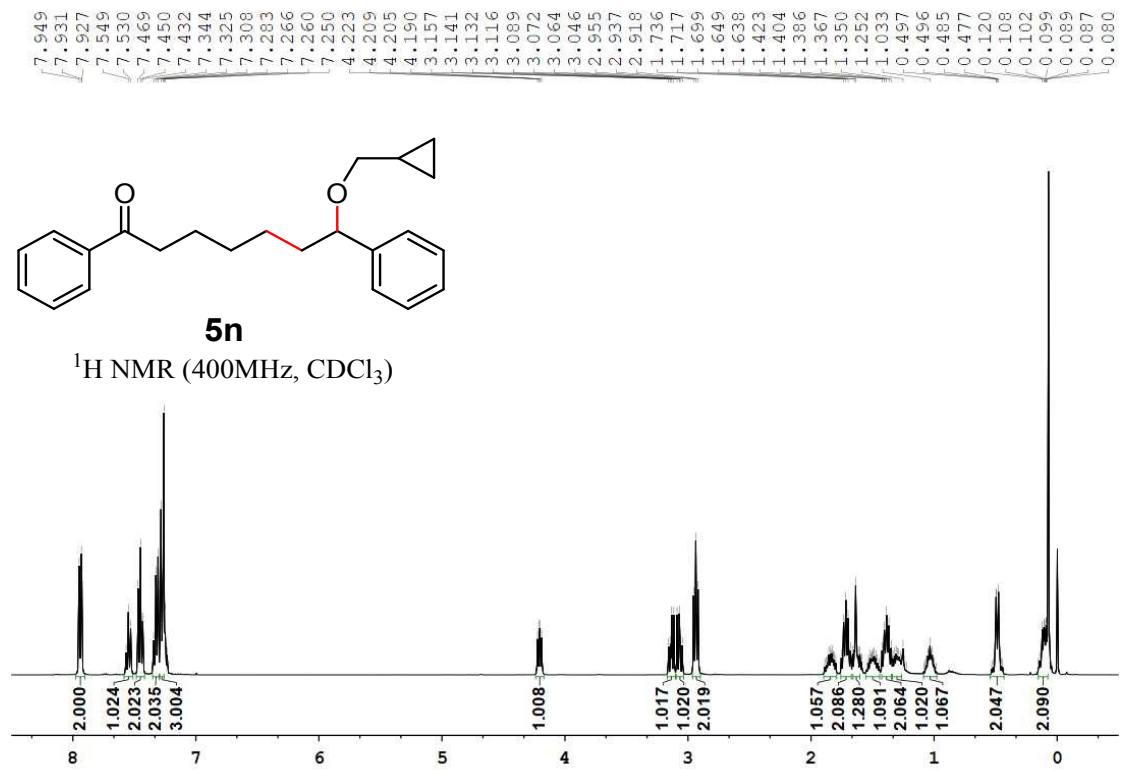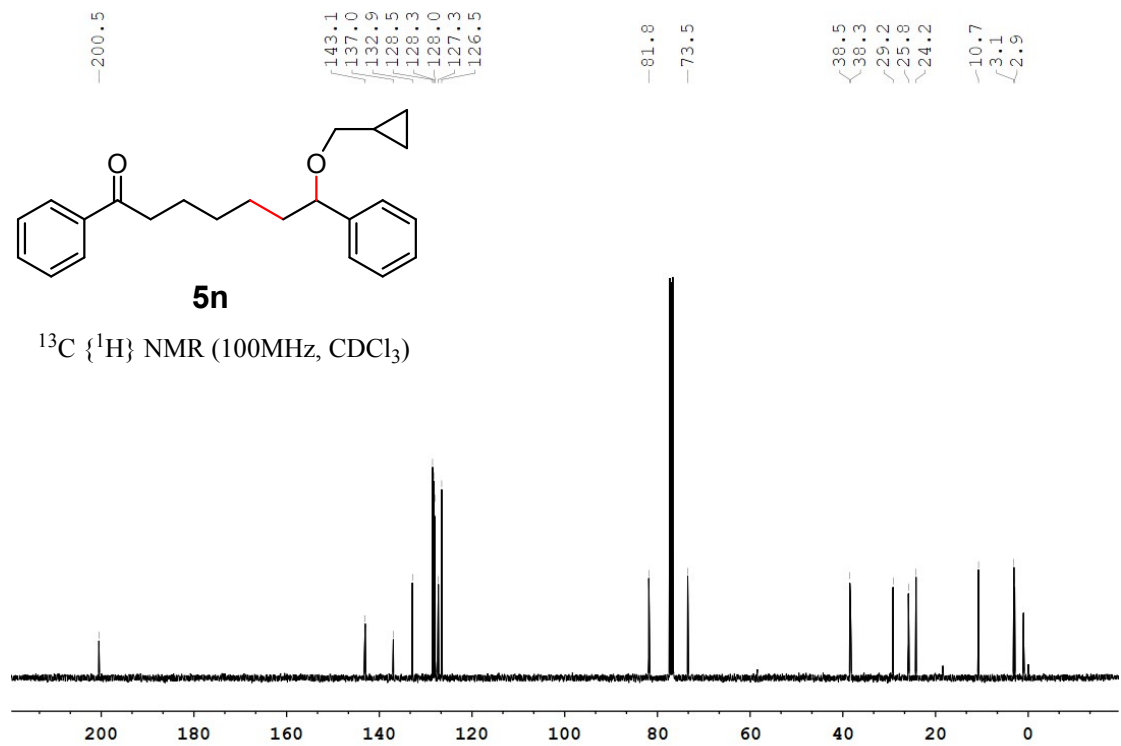

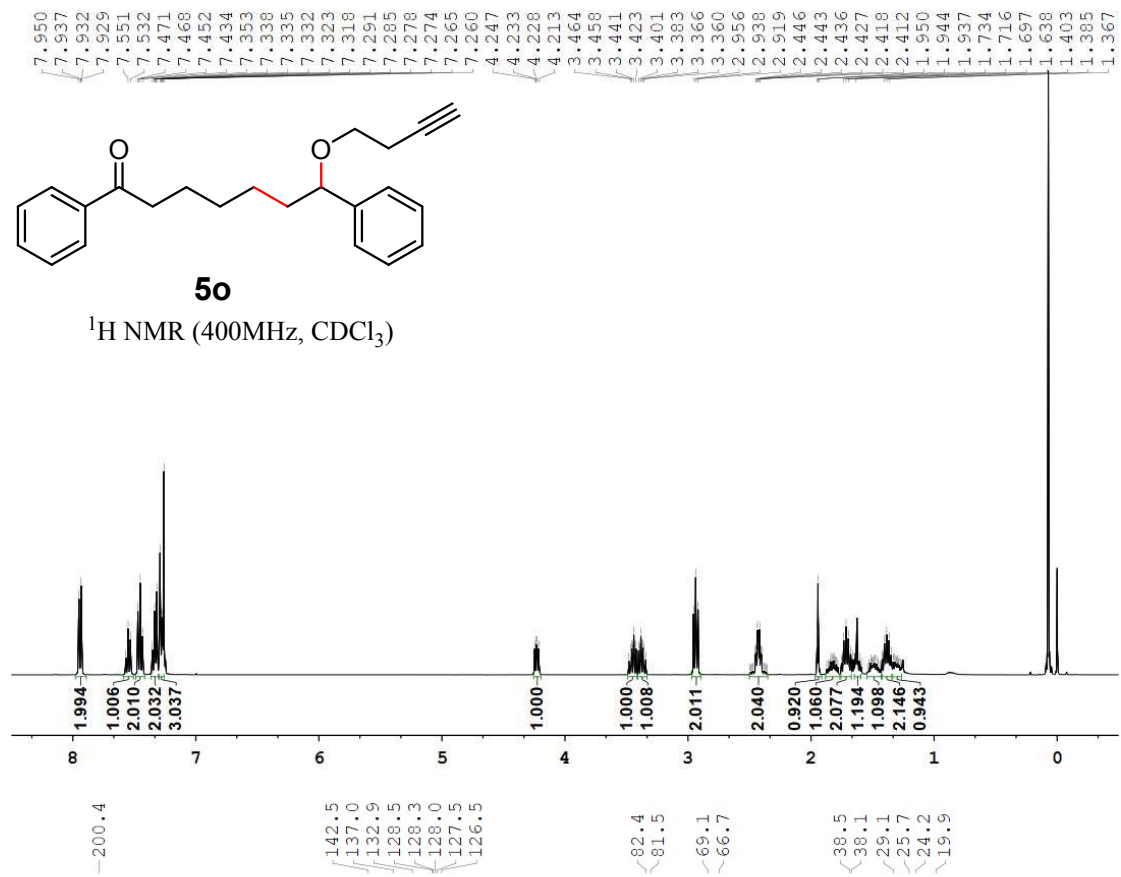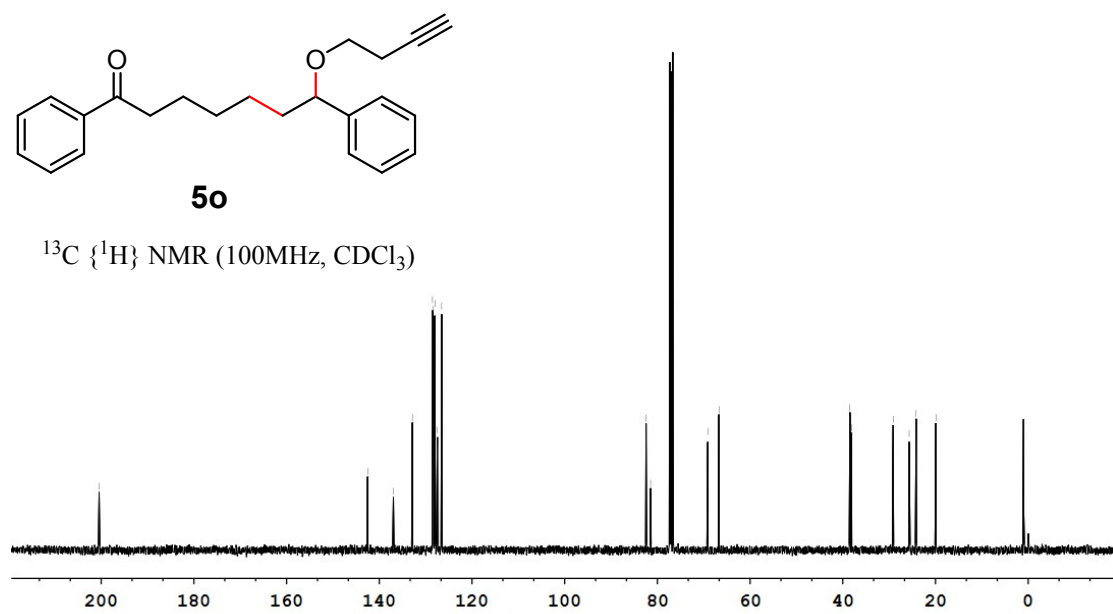

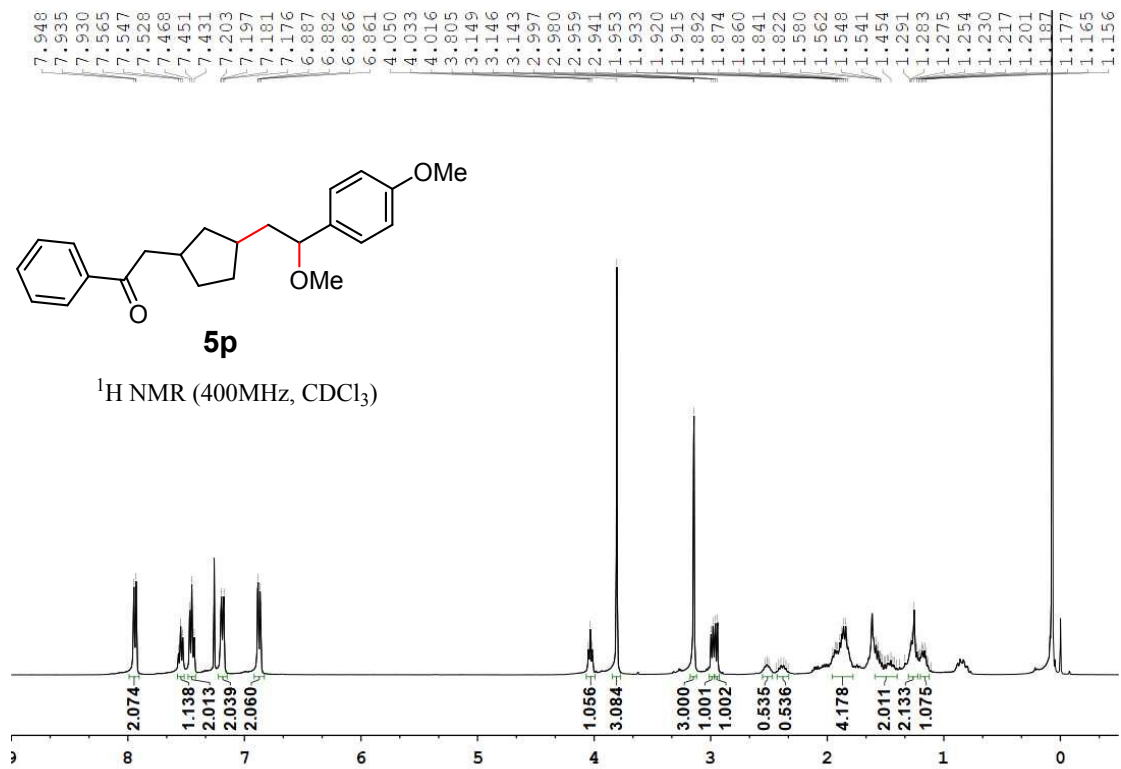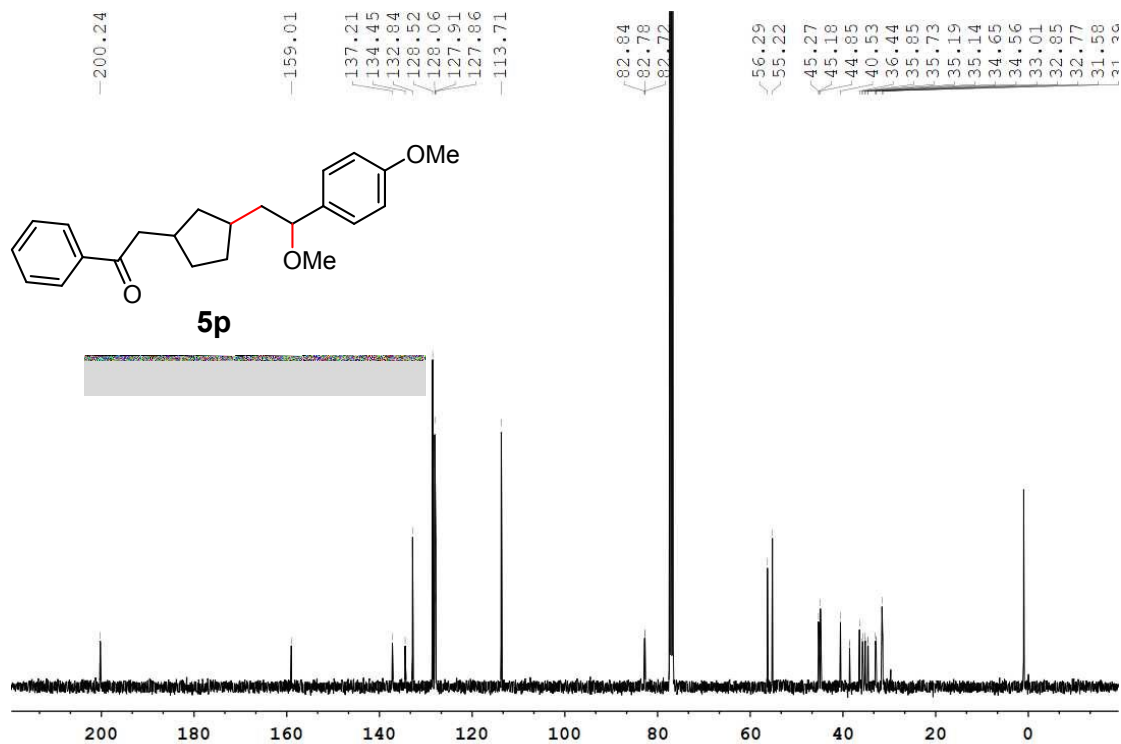

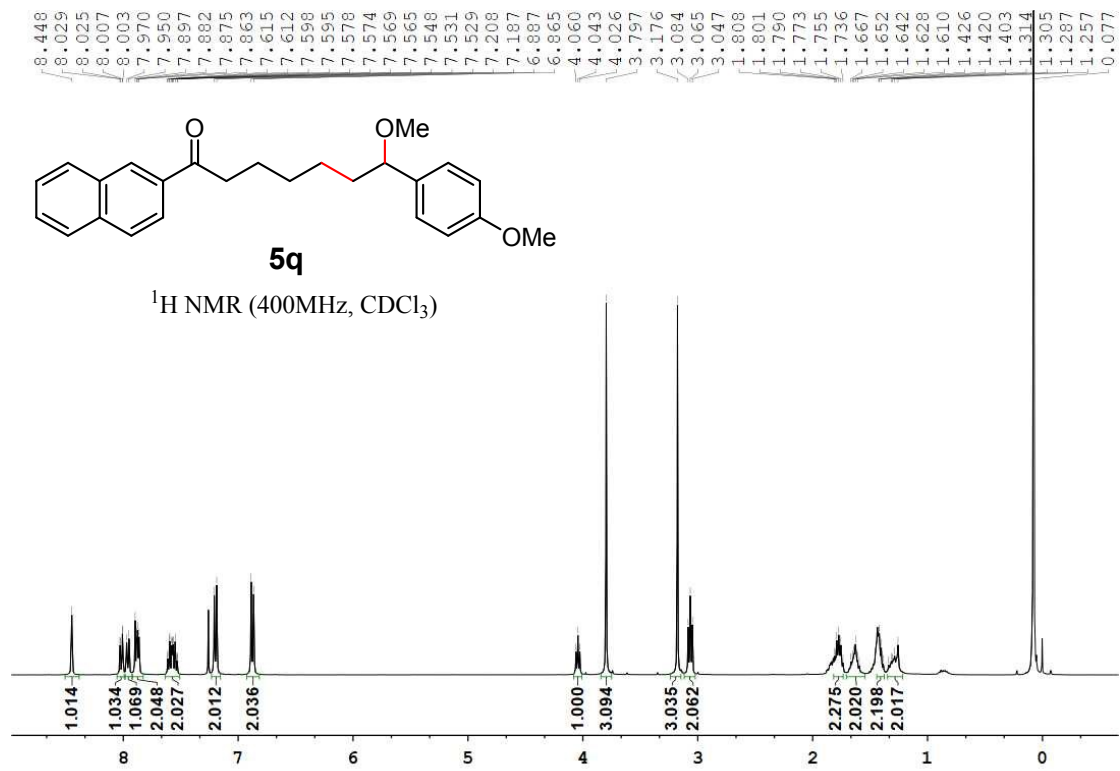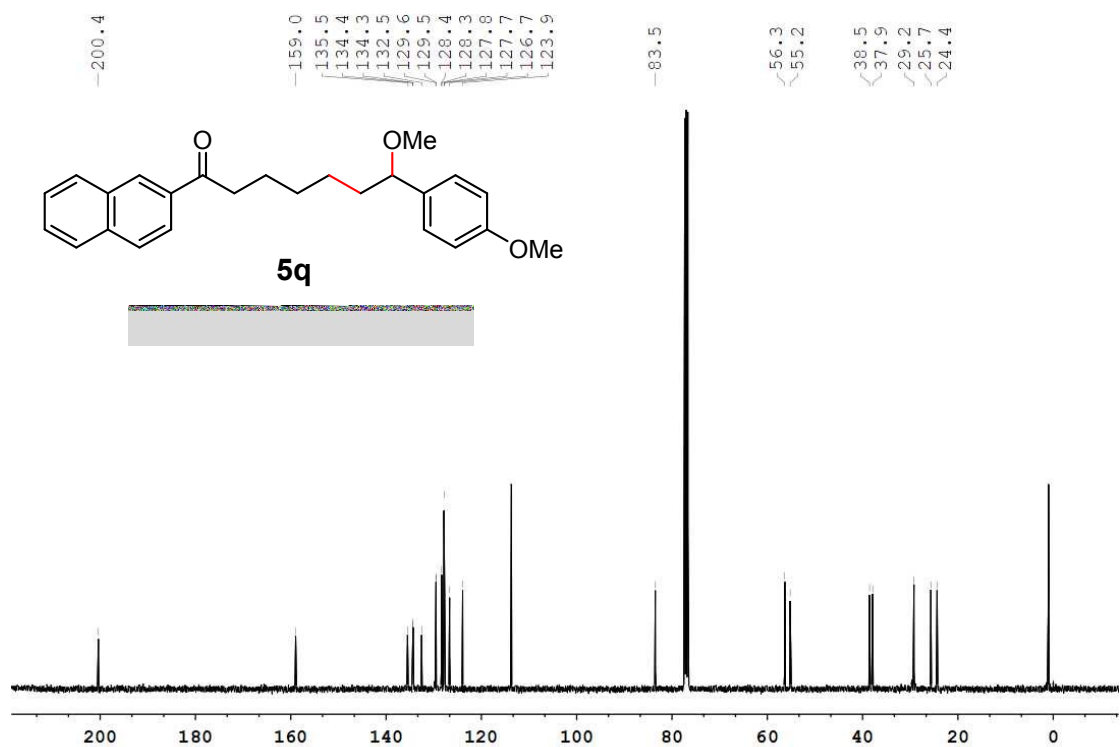



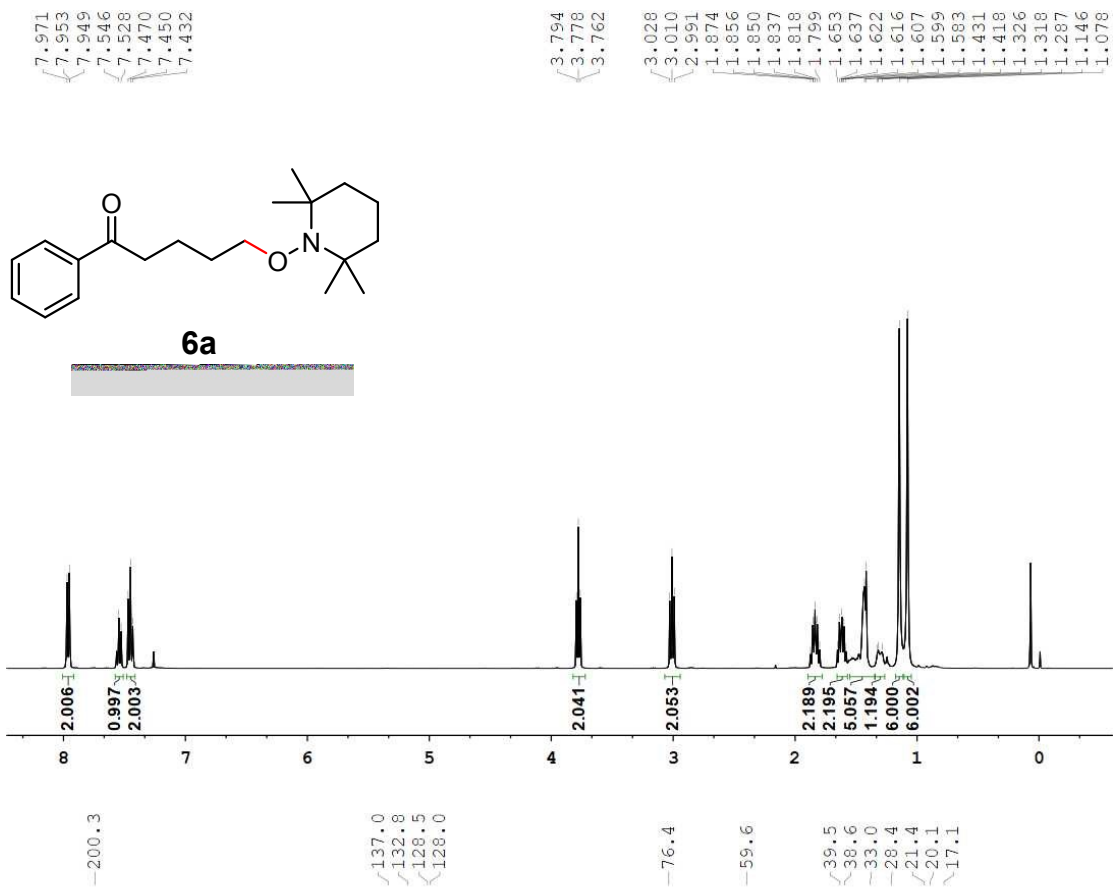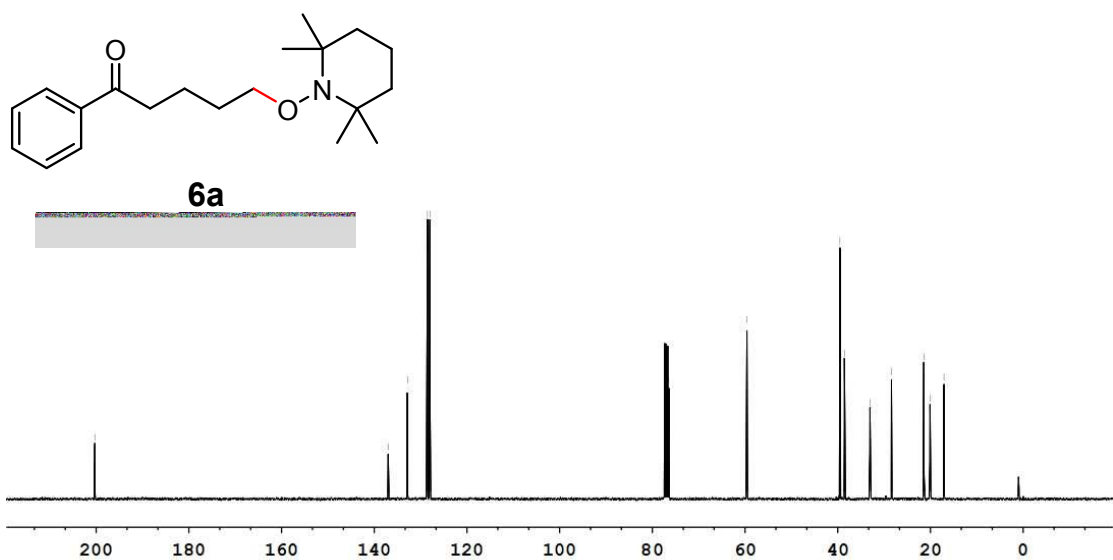

Supplement: d0qo00671h1.pdf [file d0qo00671h1.pdf]
